# Supplementary material for: Synthesis of densely substituted pyridine derivatives from nitriles by a non-classical [4+2] cycloaddition/1,5-hydrogen shift strategy
Source: Research Square preprint supplement (doi:10.21203/rs.3.rs-258126/v1), 2021-03-03
Supplement: Supplementary file 1 [file f8198fb6598dd3ea1b9708e4.docx]

Supporting Information

**Synthesis of densely substituted pyridine derivatives from nitriles by a non-classical [4+2] cycloaddition/1,5-hydrogen shift strategy**

Dandan He, Kanghui Duan, Yang Zhou, Meng Li, Huanfeng Jiang*, Wanqing Wu*

State Key Laboratory of Luminescent Materials and Devices, School of Chemistry and Chemical Engineering, South China University of Technology, Guangzhou 510641, ChinaE-mail: cewuwq@scut.edu.cn

**Contents**

**General Information………………………………….……………………….…....S2**

**Condition Optimization...…………………………………….……………….…....S2**

**General Experimental Procedure……………………………………….……..…..S3**

**References………………………………………….……………………………......S8**

**Mechanistic Studies.…………...................................................................................S9**

**Photophysical Spectra of Compounds 8 and 9.…………………………..….......S15**

**Characterization Data for Substrates and All Products………...……..…….….S16**

**X-ray Crystallographic Analysis for Product 3i....................................................S36**

**NMR Spectra for All the Compounds……………………………………..……..S37**

**General Information**

Melting points were determined with a Buchi Melting Point B-545 instrument. 1H and 13C NMR spectra were recorded using a Bruker DRX-400 spectrometer or Bruker DRX-500 spectrometer using Chloroform-*d* or DMSO-*d*6 as solvent. The peaks were internally referenced to TMS (0.00 ppm) or residual solvent signals (7.26 and 77.0 ppm for Chloroform-*d*, and 2.50 and 40.0 ppm for DMSO-*d*6). IR spectra were obtained either as potassium bromide pellets or as liquid films between two potassium bromide pellets with a Bruker TENSOR 27 spectrometer. The data of HRMS was carried out on a high-resolution mass spectrometer (LCMSIT-TOF). TLC was performed by using commercially prepared 100-400 mesh silica gel plates and visualization was effected at 254 nm. Absorption spectra were measured on a Shimadzu UV-2600 spectrophotometer. Photoluminescence spectra were obtained on a Horiba Fluoromax-4 spectrofluorometer. Unless otherwise noted, all reagents and solvents were purchased from commercial suppliers and used without further purification.

**Condition Optimization**

**Table S1.** Optimization of the reaction conditions*a*

| Entry*a* | Base | Additive | T/oC | Solvent | Time/h | Yield of **3a** (%) | Yield of recovered **1a** (%) |
| --- | --- | --- | --- | --- | --- | --- | --- |
| 1 | LiN(SiMe3)2 | *t*-BuOK | 100 | THF | 12 | 35 | 62 |
| 2 | KN(SiMe3)2 | *t*-BuOK | 100 | THF | 12 | 23 | 71 |
| 3 | NaN(SiMe3)2 | *t*-BuOK | 100 | THF | 12 | 25 | 75 |
| 4 | LiN(SiMe3)2 | *t*-BuOK | 110 | THF | 12 | 50 | 34 |
| 5 | LiN(SiMe3)2 | *t*-BuOK | 120 | THF | 12 | 55 | 22 |
| 6 | LiN(SiMe3)2 | *t*-BuOK | 130 | THF | 12 | 51 | 14 |
| 7 | LiN(SiMe3)2 | - | 120 | THF | 12 | trace | 96 |
| 8 | - | *t*-BuOK | 120 | THF | 12 | trace | 95 |
| 9 | LiN(SiMe3)2 | *t*-BuONa | 120 | THF | 12 | 43 | 40 |
| 10 | LiN(SiMe3)2 | Cs2CO3 | 120 | THF | 12 | 27 | 68 |
| 11 | LiN(SiMe3)2 | CsF | 120 | THF | 12 | 51 | 35 |
| 12 | LiN(SiMe3)2 | *t*-BuOK | 120 | cyclohexane | 12 | 55 | 8 |
| 13 | LiN(SiMe3)2 | *t*-BuOK | 120 | 1,4-dioxane | 12 | 54 | 22 |
| 14 | LiN(SiMe3)2 | *t*-BuOK | 120 | CPME | 12 | 57 | 26 |
| 15 | LiN(SiMe3)2 | *t*-BuOK | 120 | butyl oxide | 12 | 34 | 43 |
| 16 | LiN(SiMe3)2 | *t*-BuOK | 120 | DME | 12 | 52 | 12 |
| 17 | LiN(SiMe3)2 | *t*-BuOK | 120 | CPME | 24 | 65 | 14 |

*a* All reactions were performed with **1a** (0.2 mmol), **2a** (2 equiv), base (2 equiv), additive (2 equiv), solvent (1 mL, Dry) at 100~130 oC under N2 for 12 or 24 h. Yield was determined by 1H-NMR with CH3NO2 as internal standard based on **1a**. CPME = cyclopentyl methyl ether; DME = 1,2-dimethoxyethane.

**Table S2.** Quantitative optimization study*a*

| Entry*a* | **1a**/**2a**/LiN(SiMe3)2/*t*-BuOK | Yield of **3a** (%) | Yield of recovered **1a** (%) |
| --- | --- | --- | --- |
| 1 | 1:2:2:2 | 65 | 14 |
| 2 | 1:1.5:2:2 | 38 | 60 |
| 3 | 1:1:2:2 | 15 | 80 |
| 4 | 1:0.5:2:2 | trace | 97 |
| 5 | 1:2.5:2:2 | 67 | 19 |
| 6 | 1:3:2:2 | 70 | 8 |
| 7 | 1:4:2:2 | 71 | 10 |
| 8 | 1:3:1.5:2 | 57 | 20 |
| 9 | 1:3:2.5:2 | 62 | 6 |
| **10** | **1:3:2:1.5** | **84 (80)** | **n.d.** |
| 11 | 1:3:2:1.2 | 81 | n.d. |
| 12 | 1:3:2:1 | 73 | 9 |

*a* All reactions were performed with different molar ratios of **1a**/**2a**/base/additive, solvent (1 mL, dry) at 120 oC under N2 for 24 h; Yield was determined by 1H-NMR with CH3NO2 as internal standard based on **1a**. n.d. = not detected.

**General Experimental Procedure**

1. **General Procedure for the Preparation of Compound 1**

A mixture of *o*-substituted iodobenzene **M1**(2 mmol), CuI (2 mol %), Pd(PPh3)2Cl2 (1 mol %), and Et3N (5 mL) was added successively under N2 and then alkyne **M2** (2.4 mmol) was added *via* syringe. The mixture was stirred at room temperature for 5-10 h and monitored periodically by TLC. Upon completion, the reaction mixture was diluted with water (10 mL) and extracted with ethyl acetate (10 mL × 3). The combined organic layers were washed with water and brine, dried over Na2SO4, and filtered. The solvent was removed under vacuum. The residue was purified by chromatography on silica gel (petroleum ether/ethyl acetate 200:1~100:1 v/v).

**Table S3.** The structure of compounds **1a-1i**,[1-7] **1j, 1k**, **1l-1o**[8-10]

1. **General Procedure for the Preparation of Compound 4**

**The synthesis of 4**:[11] 2-Methylbenzo[*b*]thiophene (**N1**, 3 mmol), DMSO, and NH4I in ethyl acetate (10 mL) were added conc. H2SO4 at room temperature under air. The mixture was stirred at 60 oC and monitored by TLC. After cooling down to room temperature, the residue was concentrated in vacuum and purified by chromatography on silica gel (petroleum ether) to afford compound **N2**. Then product **4** was obtained from **N2** according to procedure A.

1. **General Procedure for the Preparation of Enyne 6**[12]

A mixture of *cis*-1-bromo-1-propene (1.2 g, 10 mmol), Pd(PPh3)4 (57.7 mg, 0.05 mmol, 0.5 mol %), and CuI (38 mg, 0.2 mmol, 2 mol %) in Et2NH (6 mL), cooled in an ice-bath, was added phenylacetylene (1.22 g, 12 mmol). Then the temperature was raised to room temperature and stirred for 12 h. The reaction mixture was diluted with water (10 mL) and extracted with ethyl acetate (10 mL × 3). The combined organic layers were washed with water and brine, dried over Na2SO4, and filtered. The solvent was removed under vacuum. The residue was purified by chromatography on silica gel (petroleum ether) to give (*Z*)-5-phenyl-pent-2-en-4-yne (**6**, 1.32 g, 93%).

1. **General Procedure for the Synthesis of Pyridine Derivatives**

In a glovebox, an oven-dried Schlenk tube equipped with a magnetic stirring bar was added a mixture of *o*-substituted aryl alkyne **1** (0.2 mmol), nitrile **2** (0.6 mmol), base (0.4 mmol), additive (0.3 mmol) dissolved in 1.0 mL of dry CPME. The Schlenk tube was sealed with a plug and removed from the glovebox. The mixture was allowed to stir at 120 °C under N2 for 24 h. The reaction mixture was cooled to room temperature and quenched by 10 mL water. The product was extracted with ethyl acetate (10 mL × 3). The organic phase was dried over Na2SO4 and concentrated in vacuum. The resulting residue was purified by silica gel column chromatography using petroleum ether/ethyl acetate (100:1-10:1 v/v) as eluent to afford the corresponding product **3**.

In a glovebox, an oven-dried Schlenk tube equipped with a magnetic stirring bar was added a mixture of *o*-substituted aryl alkyne **4** (0.2 mmol), nitrile **2** (0.6 mmol), base (0.4 mmol), additive (0.24 mmol) dissolved in 0.5 mL of dry CPME. The Schlenk tube was sealed with a plug and removed from the glovebox. The mixture was allowed to stir at 120 °C under N2 for 24 h. The reaction mixture was cooled to room temperature and quenched by 10 mL water. The product was extracted with ethyl acetate (10 mL × 3). The organic phase was dried over Na2SO4 and concentrated in vacuum. The resulting residue was purified by silica gel column chromatography using petroleum ether/ethyl acetate (100:1-10:1 v/v) as eluent to afford the corresponding product **5**.

In a glovebox, an oven-dried Schlenk tube equipped with a magnetic stirring bar was added a mixture of 1-methyl-1,3-enyne **6** (0.2 mmol), nitrile **2** (0.6 mmol), base (0.4 mmol), additive (0.24 mmol) dissolved in 0.5 mL of dry 1,4-dioxane. The Schlenk tube was sealed with a plug and removed from the glovebox. The mixture was allowed to stir at 120 °C under N2 for 12 h. The reaction mixture was cooled to room temperature and quenched by 10 mL water. The product was extracted with ethyl acetate (10 mL × 3). The organic phase was dried over Na2SO4 and concentrated in vacuum. The resulting residue was purified by silica gel column chromatography using petroleum ether/ethyl acetate (100:1-50:1 v/v) as eluent to afford the corresponding product **7**.

1. **General Procedure for the Synthesis of 1c-*d***[13, 14]

Under N2 atmosphere, the solution of **S1** (4.45 g, 17 mmol) in dry THF (10 mL) was added to a suspension solution of LiAlD4 (588 mg, 14 mmol) in dry THF (20 mL). The mixture was stirred at room temperature for 6 h. After the reaction was completed, the wet THF was added dropwise to quench the reaction, followed by the addition of 1.4 mL of 10% NaOH aq. The white solid was appeared, then filtered and dried by anhydrous MgSO4. The solvent was removed by vacuum and the residue was purified by column chromatography to give a white solid **S2** (3.41 g, 85% yield). 1H NMR (400 MHz, CDCl3) *δ* ppm 7.83 – 7.79 (m, 1H), 7.45 – 7.41 (m, 1H), 7.38 – 7.32 (m, 1H), 7.02 – 6.95 (m, 1H), 2.40 (s, 1H).

To a solution of **S2** (3.41 g, 14.5 mmol), PPh3 (4.6 g, 17.4 mmol) in 40 mL of dry CH2Cl2, *N*-bromosuccinimide (NBS, 3.1 g, 17.4 mmol) was added with several potions at 0 oC. The mixture was stirred overnight at room temperature. After the reaction was finished, the petroleum ether (100 mL) was added to the mixture solution, and the solid was filtered. The solvent was removed by vacuum, and the residue was purified by column chromatography to afford a white solid **S3** (3.02 g, 70% yield). 1H NMR (400 MHz, CDCl3) *δ* ppm 7.87 – 7.83 (m, 1H), 7.49 – 7.45 (m, 1H), 7.36 – 7.30 (m, 1H), 7.01 – 6.95 (m, 1H).

Under N2 atmosphere, a mixture of **S3** (3.02 g, 10 mmol) and LiAlD4 (0.21 g, 5 mmol) dissolved in THF (6 mL) was added in an oven-dried 25 mL Schlenk tube. The reaction was stirred at 50 oC overnight. Then the reaction was quenched cautiously with water and the ether layer dried (MgSO4). The solvent was removed by vacuum and residue was purified by column chromatography to give a colorless oil **S4** (1.33 g, 60% yield). 1H NMR (400 MHz, CDCl3) *δ* ppm 7.81 (d, *J* = 7.6 Hz, 1H), 7.29 – 7.19 (m, 2H), 6.91 – 6.82 (m, 1H).

A mixture of **S4** (1.33 g, 6 mmol), CuI (23 mg, 2 mol %), PdCl2(PPh3)2 (42 mg, 1 mol %), and Et3N (10 mL) was added successively to a Schlenk tube equipped with a magnetic stirring bar under N2. Then 1-ethynyl-4-methoxybenzene (0.95 g, 7.2 mmol) was added *via* syringe. The mixture was stirred at room temperature for 6 h and monitored periodically by TLC. Upon completion, the reaction mixture was diluted with water (30 mL) and extracted with ethyl acetate (30 mL × 3). The combined organic layers were washed with water and brine, dried over Na2SO4, and filtered. The solvent was removed under vacuum. The residue was purified by chromatography on silica gel (petroleum ether/ethyl acetate 100:1 v/v) to give a white solid **1c-*d***(1.22 g, 90% yield). 1H NMR (400 MHz, CDCl3) *δ* ppm 7.55 – 7.44 (m, 3H), 7.25 – 7.21 (m, 2H), 7.21 – 7.14 (m, 1H), 6.95 – 6.83 (m, 2H), 3.84 (s, 3H).

1. **General Procedure for the Synthesis of 8 and 9**

**The synthesis of 8**:[15]Under N2 atmosphere, a mixture of Pd(dppf)Cl2 (7 mg, 0.01 mmol), vinylboronate (86 mg, 0.2 mmol), **5f** (206 mg, 0.48 mmol), Cs2CO3 (196 mg, 0.6 mmol), H2O (40 µL, 2.2 mmol) and dioxane (3 mL) was added to a Schlenk tube equipped with a magnetic stirring bar. Then the solution was stirred at 70 °C for 24 h. The mixture was allowed to cool to room temperature and diluted with CH2Cl2 (10 mL). The resulting solution was washed with saturated aqueous NH4Cl (10 mL). The aqueous layer was extracted with CH2Cl2 (20 mL × 3). The combined organic layer was dried over anhydrous Na2SO4 and concentrated in vacuo. The residue was purified by silica gel chromatography to afford the desired product **8** (105 mg, 60% yield).

**The synthesis of 9**:[16, 17] To a round-bottom flask containing the acetal **5n** (1 mmol) in chloroform (2 mL) was slowly added trifluoroacetic acid (6 equiv) at ambient temperature. The resulting solution was allowed to stir for 20 h, and then the mixture was quenched with water (10 mL) and extracted with EtOAc (10 mL × 3). The organic layer was washed with brine and dried over MgSO4. The desired aldehyde was obtained directly after the removal of solvent in vacuo. Next, malononitrile (1 mmol) was added to a stirred solution of aldehyde (1 mmol) and piperidine (0.1 mmol) in ethanol (3 mL). The reaction mixture was stirred at room temperature for 1 h. A precipitate was formed and collected by suction filtration, and then purified by recrystallization from CH2Cl2 and petroleum ether to afford product **9** (406 mg, 95% yield).

**References**

[1] N. Kakusawa, K. Yamaguchi, J. Kurita, *J. Organomet. Chem.* **2005**, *690*, 2956.

[2] J. Moon, M. Jeong, H. Nam, J. Ju, J. H. Moon, H. M. Jung, S. Lee, *Org. Lett*. **2008**, *10*, 945.

[3] R. Bernini, S. Cacchi, G. Fabrizi, G. Forte, F. Petrucci, A. Prastaro, S. Niembro, A. Shafird, A. Vallribera, *Green Chem*. **2010**,*12*, 150.

[4] C. I. Ezugwu, B. Mousavi, M. A. Asraf, Z. Luo, F. Verpoort, *J. Catal.* **2016**, *344*, 445.

[5] Y. Yuan, H. Zhu, D. Zhao, L. Zhang, *Synthesis* **2011**, 1792.

[6] L. Liu, W.-Q. Yu, T. Huang, T. Chen, *Tetrahedron Lett.* **2020**, *61*, 151647.

[7] J. Park, K. H. Song, S. Lee, *Synthesis* **2018**, *50*, 3197.

[8] L.-L. Chen, J.-W. Zhang, W.-W. Yang, J.-Y. Fu, J.-Y. Zhu, Y.-B. Wang, *J. Org. Chem*. **2019**, *84*, 12, 8090.1l

[9] K. Sprenger, C. Golz, M. Alcarazo, *Eur. J. Org. Chem*. **2020**, 6245.

[10] D. Domyati, R. Latifi, L. Tahsini, *J. Organomet. Chem*. **2018**, *860*, 98.

[11] S. Song, X. Sun, X. Li, Y. Yuan, N. Jiao, *Org. Lett*. **2015**, *17*, 2886.

[12] B. Kang, D. Kim, Y. Do, S. Chang, *Org. Lett.* **2003**, *5*, 3041.

[13] R. P. Hanzlik, A. R. Schaefer, J. B. Moon, C. M. Judson, *J. Am. Chem. Soc*. **1987**, *109*, 4926.

[14] X. Qi, P. Chen, G. Liu, *Angew. Chem. Int. Ed*. **2017**, *56*, 9517.

[15] M. Zhang, Y, Yao, P. J. Stang, W. Zhao, *Angew. Chem. Int. Ed*. **2020**, *59*, 20090.

[16] W. Li, J. Li, Y. Wu, N. Fuller, M. A. Markus, *J. Org. Chem*. **2010**, *75*, 1077.

[17] J.-R. Xin, J.-T. Guo, D. Vigliaturo, Y.-H. He, Z. Guan, *Tetrahedron* **2017**, *73*, 4627.

**Mechanistic Studies**

**15N-Labling Experiment**

**Figure S1**. HRMS analysis of 15N-labling experiment

**Hammett Studies**

In a glovebox, an oven-dried Schlenk tube was charged with **4a** (0.1 mmol), several electronically different benzonitriles (0.3 mmol), LiN(SiMe3)2 (0.2 mmol), *t*-BuOK (0.12 mmol) and 0.25 mL CPME. The Schlenk tube was sealed with a plug and removed from the glovebox. All the tubes were allowed to stir at 120 °C under N2. The progress of the reaction was analyzed by 1H-NMR with CH3NO2 as internal standard. Reactivity towards the cycloaddition from nitrile follows the sequence: *p*-OMe > *p*-Me > *p*-H > *p*-Cl > *p*-CF3. The corresponding results are summarized in the following table.

**Table S4**. Hammett Analysis with the *para*-Substitution Constant (σ*P*)

| Substrate | K x 10-3 (min-1) | KX/KH | Lg(KX/KH) | σ | ρ |
| --- | --- | --- | --- | --- | --- |
| 4-Methoxy benzonitrile | 415.9 | 4.8025 | 0.6815 | -0.268 | -2.95 |
| 4-Methyl benzonitrile | 223.9 | 2.5855 | 0.4125 | -0.17 |
| Benzonitrile | 86.6 | 1 | 0 | 0 |
| 4-Chloro benzonitrile | 3.7 | 0.0427 | -1.3696 | 0.227 |
| 4-Trifluoromethyl benzonitrile | 2.9 | 0.0335 | -1.4750 | 0.54 |


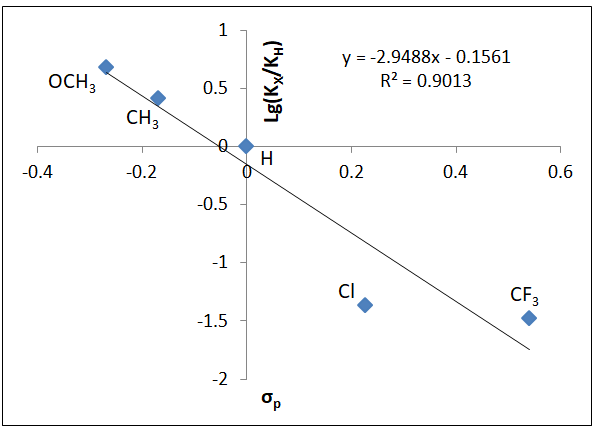


**Figure S2**. Hammett plot for the cycloaddition


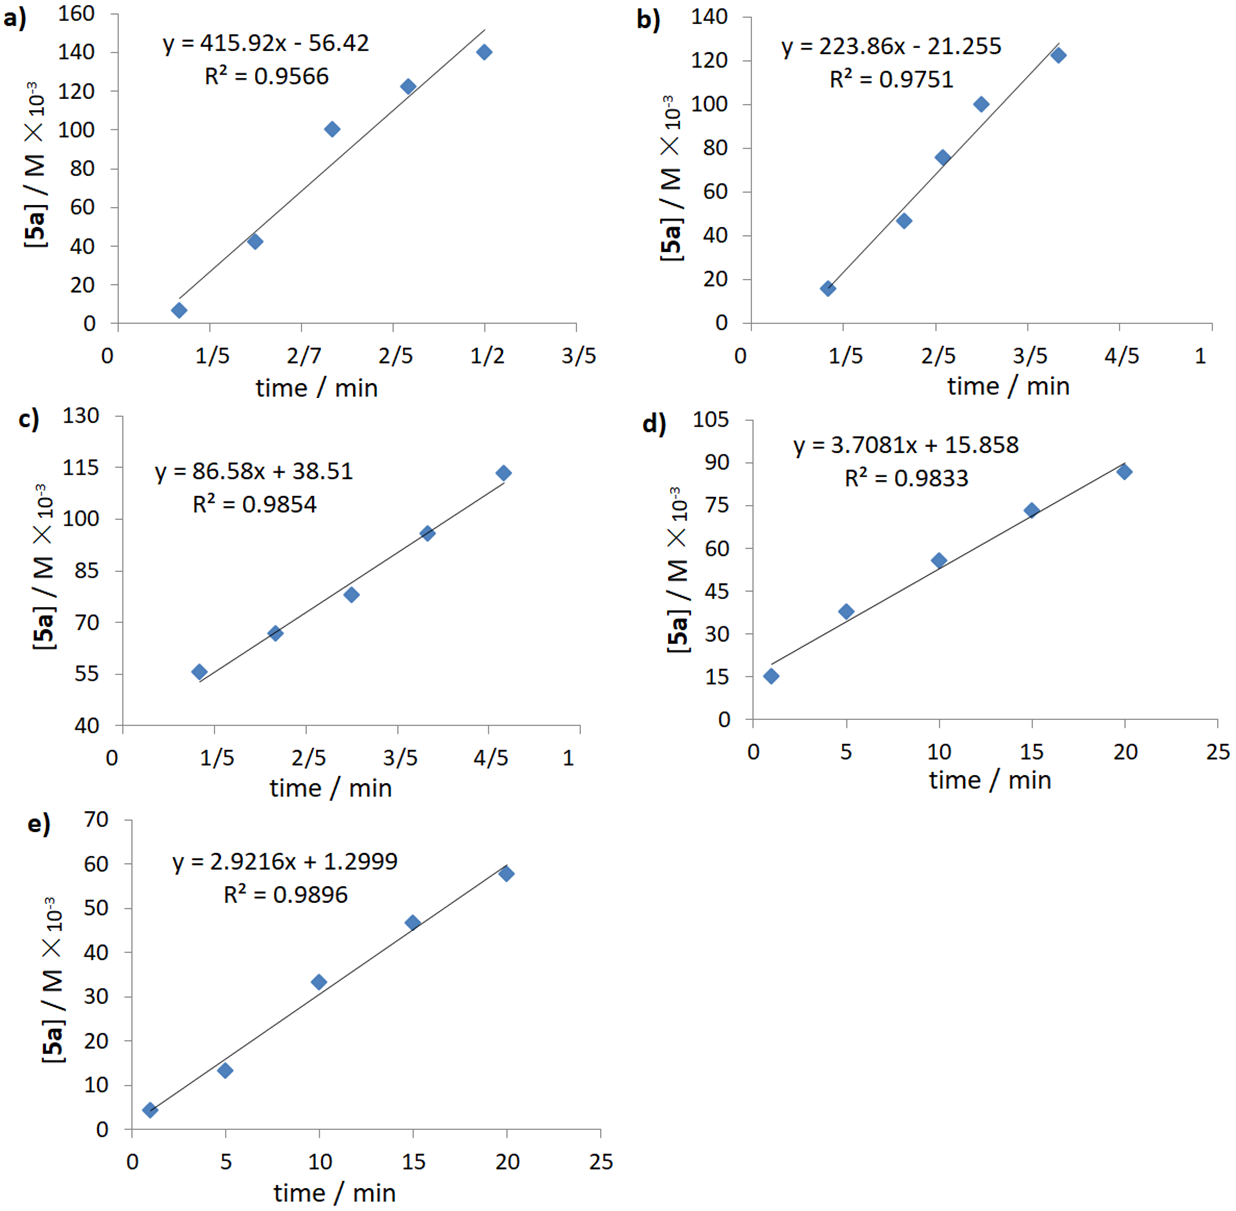


**Figure S3**. Determination of rate constant for the electronically different nitriles during the cycloaddition process: a) R = OCH3; b) R = CH3; c) R = H; d) R = Cl; e) R = CF3.

**Kinetic Studies**

The kinetic profile of the reaction was studied by obtaining initial rates of the reaction with different concentrations of **1c**, **2a**, LiN(SiMe3)2, and *t*-BuOK. The rates were monitored by 1H-NMR analysis using CH3NO2 as an internal standard.


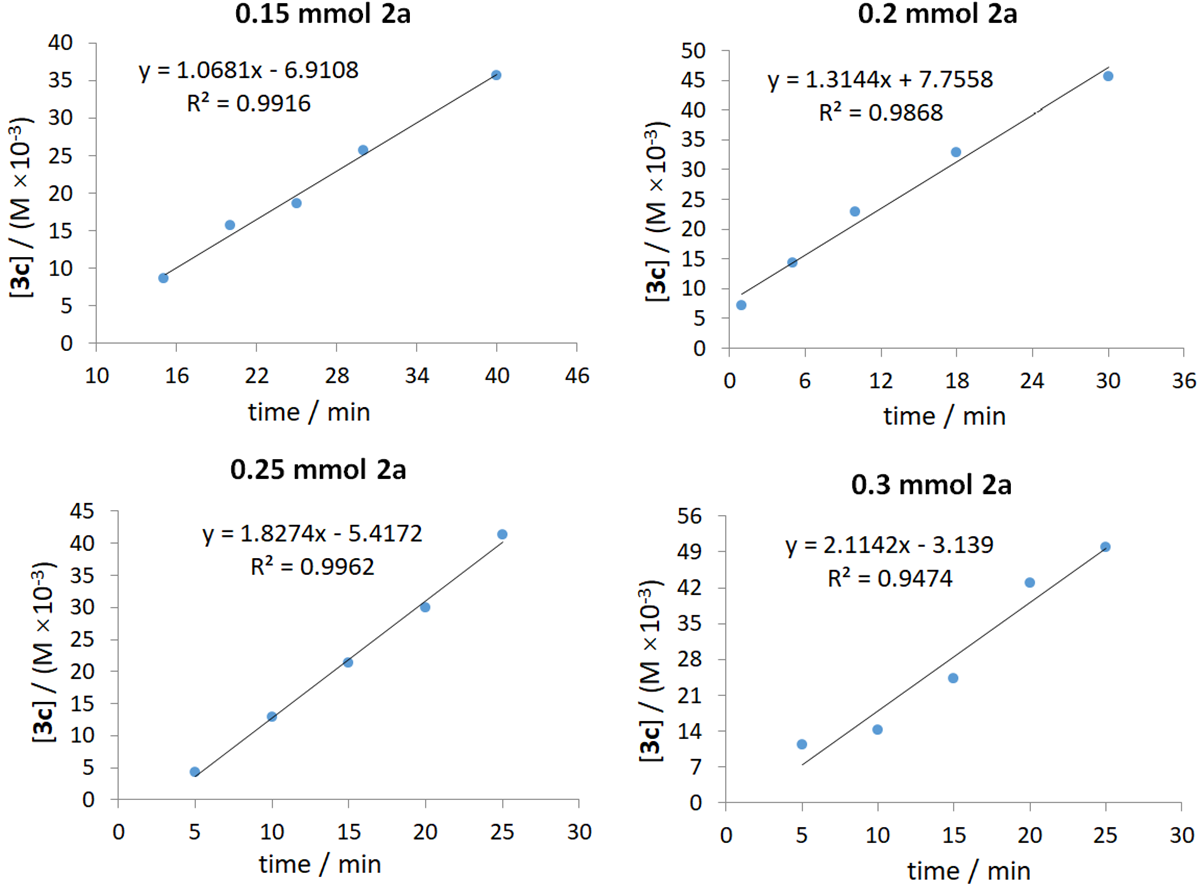


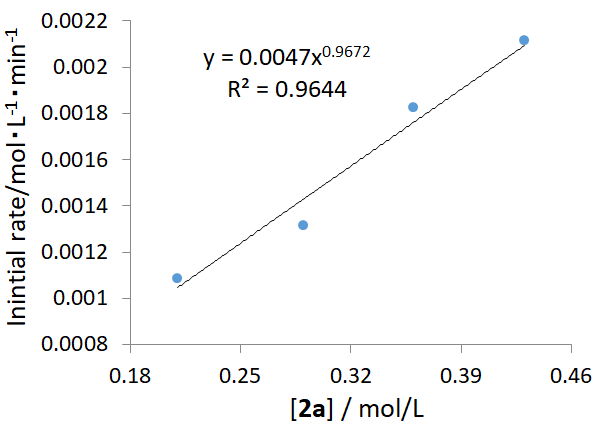


| **2a** / mmol | [**2a**] / (mol▪L-1) | K (mol▪L-1min-1) |
| --- | --- | --- |
| 0.15 | 0.21 | 0.0010857 |
| 0.2 | 0.29 | 0.0013144 |
| 0.25 | 0.36 | 0.0018274 |
| 0.3 | 0.43 | 0.0021142 |

**Figure S4.** Dependence of the reaction rate on concentration of **2a**

Kinetic profiles of different initial concentrations of **2a** (from 0.15 mmol to 0.3 mmol). Reaction conditions: **1c** (0.1 mmol), LiN(SiMe3)2 (0.2 mmol, 1.0 M in THF), *t*-BuOK (0.15 mmol), carried out in 0.5 mL of CPME at 120 °C.


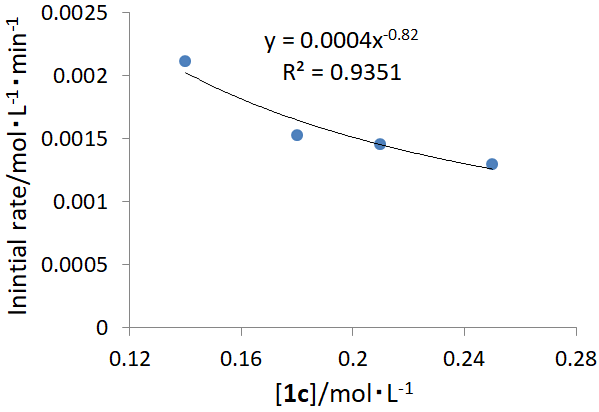

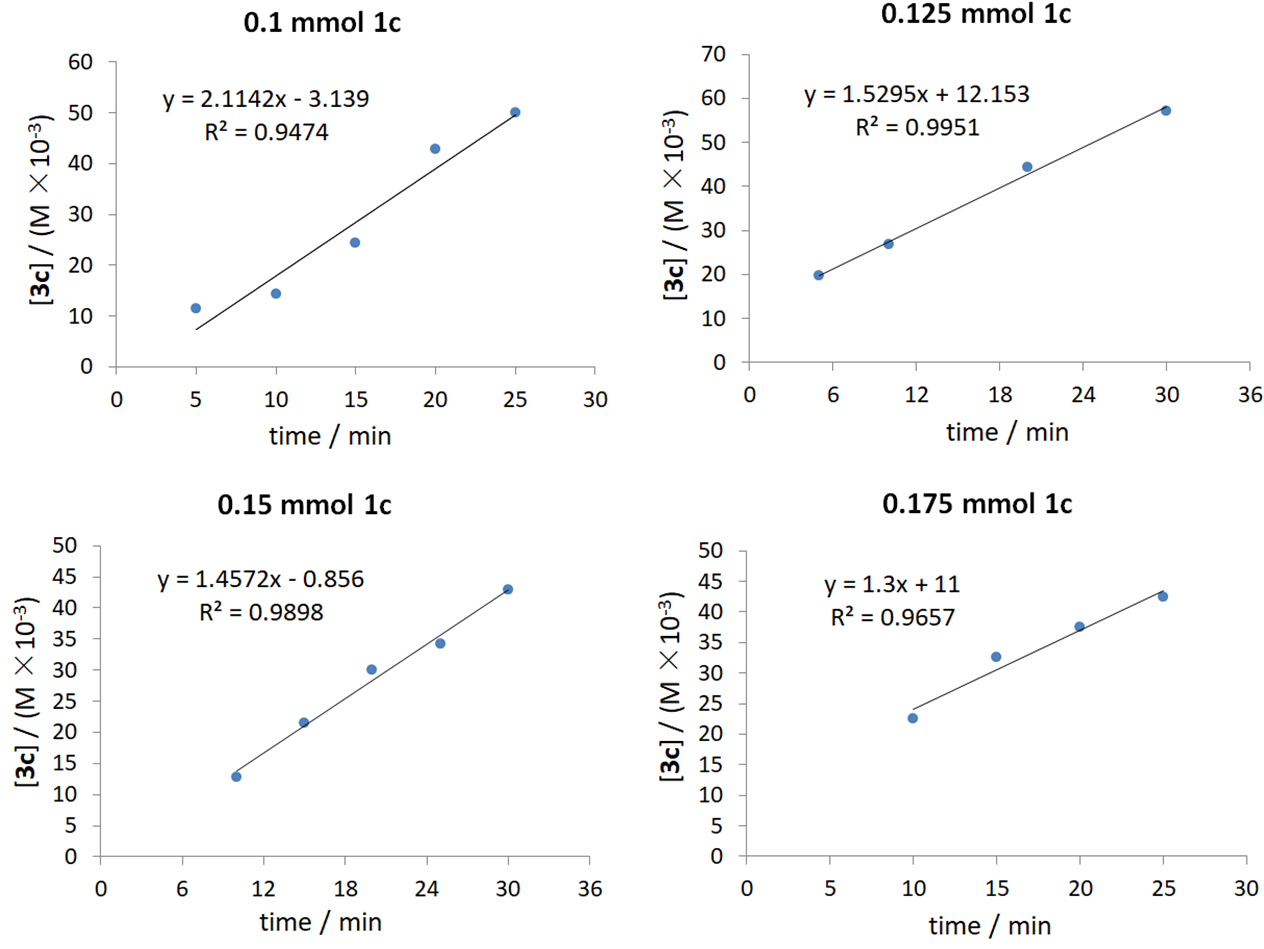


| **1c** / mmol | [**1c**] / (mol▪L-1) | K (mol▪L-1min-1) |
| --- | --- | --- |
| 0.1 | 0.14 | 0.0021142 |
| 0.125 | 0.18 | 0.0015295 |
| 0.15 | 0.21 | 0.0014572 |
| 0.175 | 0.25 | 0.0013 |

**Figure S5.** Dependence of the reaction rate on concentration of **1c**

Kinetic profiles of different initial concentrations of **1c** (from 0.1 mmol to 0.175 mmol). Reaction conditions: **2a** (0.3 mmol), LiN(SiMe3)2 (0.2 mmol, 1.0 M in THF), *t*-BuOK (0.15 mmol), carried out in 0.5 mL of CPME at 120 °C.


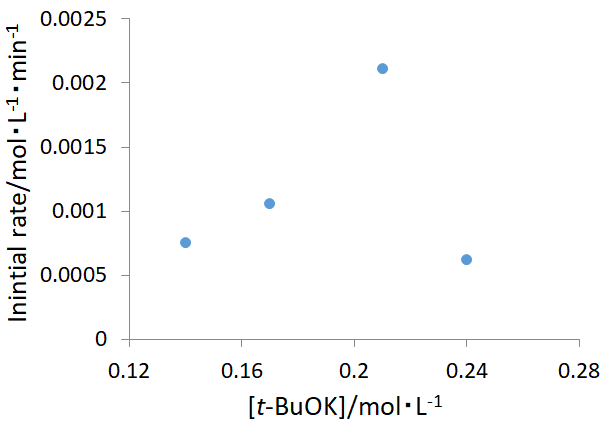

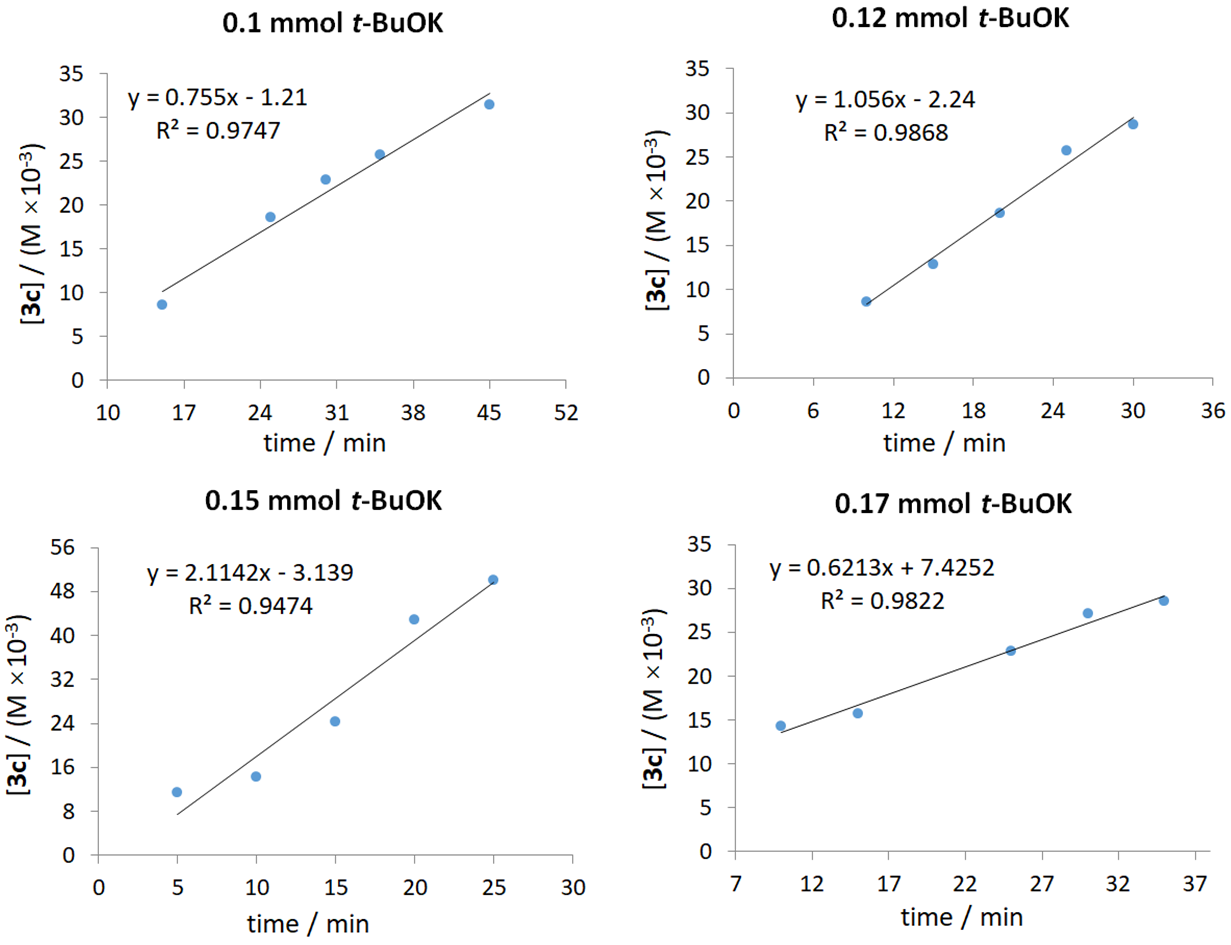


| *t*-BuOK/ mmol | [*t*-BuOK] / (mol▪L-1) | K (mol▪L-1min-1) |
| --- | --- | --- |
| 0.1 | 0.14 | 0.000755 |
| 0.12 | 0.17 | 0.001056 |
| 0.15 | 0.21 | 0.0021142 |
| 0.17 | 0.24 | 0.0006213 |

**Figure S6.** Dependence of the reaction rate on concentration of *t*-BuOK

Kinetic profiles of different initial concentrations of *t*-BuOK (from 0.1 mmol to 0.17 mmol). Reaction conditions: **1c** (0.1 mmol), **2a** (0.3 mmol), LiN(SiMe3)2 (0.2 mmol, 1.0 M in THF), carried out in 0.5 mL of CPME at 120 °C.

**
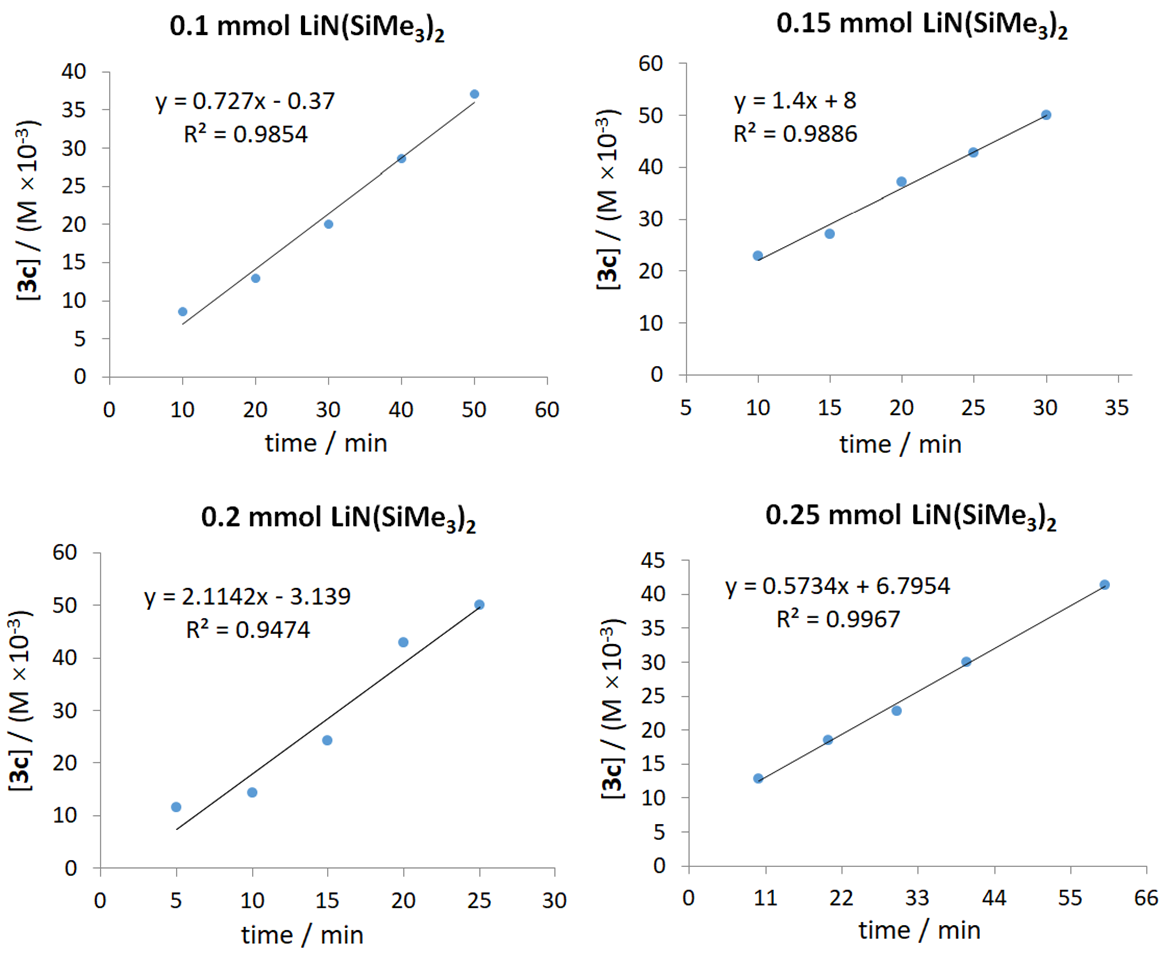
**

**
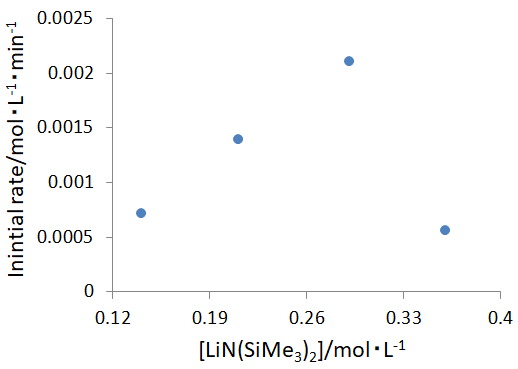
**

| LiN(SiMe3)2 / mmol | [LiN(SiMe3)2] / (mol▪L-1) | K (mol▪L-1min-1) |
| --- | --- | --- |
| 0.1 | 0.14 | 0.000727 |
| 0.15 | 0.21 | 0.0014 |
| 0.2 | 0.29 | 0.002114 |
| 0.25 | 0.36 | 0.000573 |

**Figure S7.** Dependence of the reaction rate on concentration of LiN(SiMe3)2

Kinetic profiles of different initial concentrations of LiN(SiMe3)2 (1 M in THF) (from 0.1 mmol to 0.25 mmol). Reaction conditions: **1c** (0.1 mmol), **2a** (0.3 mmol), *t*-BuOK (0.15 mmol), carried out in 0.5 mL of CPME (except 0.45 mL for 0.25 mmol) at 120 °C.

**Isotopic Effect Study of 1c-*d***

**Figure S8.** Hydrogen/deuterium exchange results of **1c-*d***analyzed by 1H-NMR

**Photophysical Spectra of Compounds 8 and 9**


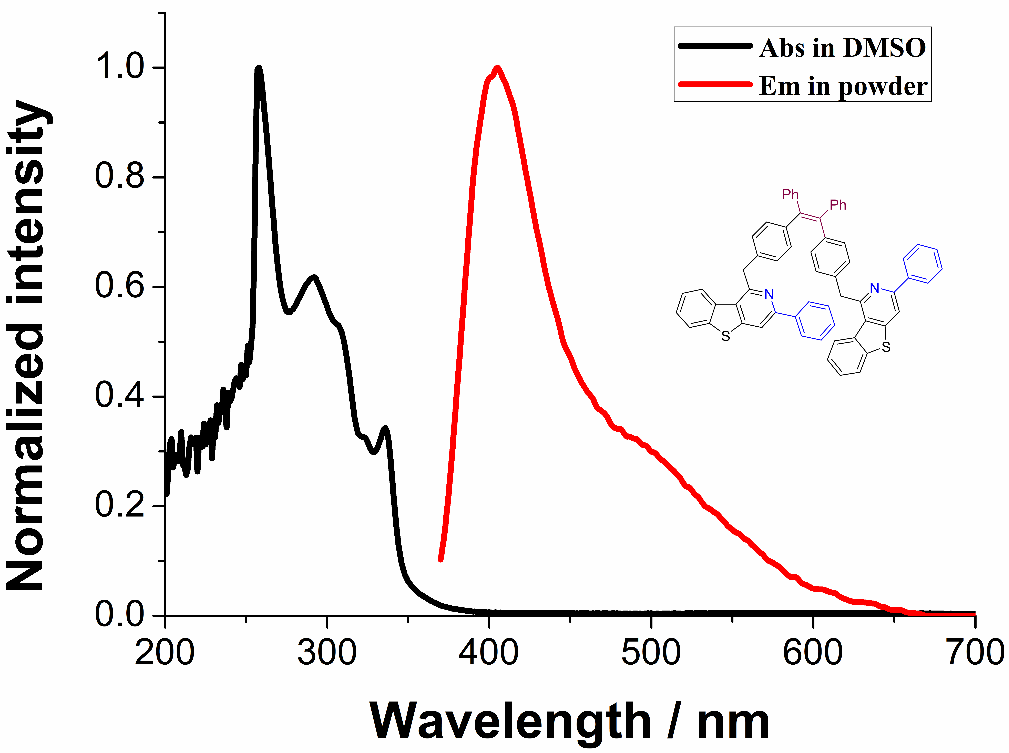

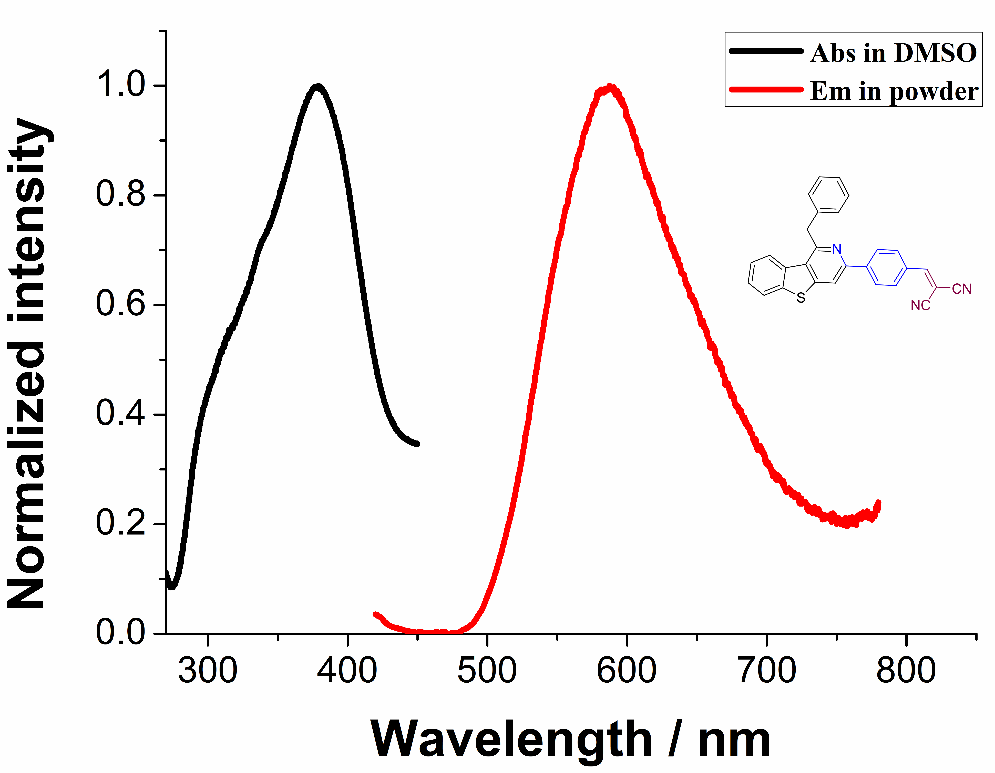


**Figure S9.** Photophysical spectra of compounds **8** and **9**. Absorption in DMSO at 100.0 *μ*M; Emission in powder.

**Characterization Data for Substrates and All Products**

**3-Methyl-4-(phenylethynyl)-1,1'-biphenyl (1j):**

1H NMR (400 MHz, CDCl3) *δ* ppm 7.77 – 7.61 (m, 5H), 7.58 – 7.47 (m, 4H), 7.47 – 7.37 (m, 4H), 2.68 (s, 3H); 13C NMR (100 MHz, CDCl3) *δ* ppm 141.0, 140.5, 140.5, 132.2, 131.5, 128.7, 128.3, 128.1, 128.1, 127.5, 127.0, 124.3, 123.5, 122.0, 94.0, 88.3, 20.86 (d, *J* = 2.2 Hz); HRMS (ESI) calc. C21H16 [M+H]+: 269.1325, found: 269.1321.

**4-Methyl-3-(phenylethynyl)-1,1'-biphenyl (1k):**

1H NMR (400 MHz, CDCl3) *δ* ppm 7.78 (s, 1H), 7.66 – 7.56 (m, 4H), 7.52 – 7.43 (m, 3H), 7.36 (d, J = 15.2 Hz, 5H), 2.58 (s, 3H); 13C NMR (100 MHz, CDCl3) *δ* ppm 140.3, 139.1, 138.7, 131.5, 130.4, 129.9, 128.8, 128.4, 128.2, 127.3, 127.0, 126.9, 123.4, 93.4, 88.3, 20.4; HRMS (ESI) calc. C21H16 [M+H]+: 269.1325, found: 269.1321.

**2-Methyl-3-(phenylethynyl)benzo[*b*]thiophene (4a):**

1H NMR (400 MHz, CDCl3) *δ* 7.93 (d, *J* = 7.9 Hz, 1H), 7.76 (d, *J* = 8.0 Hz, 1H), 7.65 – 7.60 (m, 2H), 7.48 – 7.30 (m, 5H), 2.75 (s, 3H); 13C NMR (100 MHz, CDCl3) *δ* ppm 144.9, 139.9, 137.5, 131.6, 128.4, 124.6, 124.4, 123.4, 122.5, 122.0, 115.8, 94.5, 82.6; HRMS (ESI) calc. C17H12S [M+H]+: 249.0732, found: 249.0729.

**3-((4-Methoxyphenyl)ethynyl)-2-methylbenzo[*b*]thiophene (4b):**

1H NMR (400 MHz, CDCl3) *δ* ppm 7.94 (d, *J* = 7.5 Hz, 1H), 7.77 (d, *J* = 8.7 Hz, 1H), 7.58 (d, *J* = 8.9 Hz, 2H), 7.45 (t, *J* = 7.0 Hz, 1H), 7.35 (t, *J* = 7.6 Hz, 1H), 6.93 (d, *J* = 8.8 Hz, 2H), 3.85 (s, 3H), 2.75 (s, 3H); 13C NMR (100 MHz, CDCl3) *δ* ppm 159.6, 144.1, 139.9, 137.5, 133.0, 124.5, 124.3, 122.4, 121.9, 116.0, 115.5, 114.0, 94.4, 81.2, 55.2, 15.3; HRMS (ESI) calc. C18H14OS [M+H]+: 279.0838, found: 279.0836.

***N*,*N*-Dimethyl-4-((2-methylbenzo[*b*]thiophen-3-yl)ethynyl)aniline (4c):**

1H NMR (400 MHz, CDCl3) *δ* ppm 8.01 (d, *J* = 7.9 Hz, 1H), 7.80 (d, *J* = 8.0 Hz, 1H), 7.59 – 7.54 (m, 2H), 7.51 – 7.45 (m, 1H), 7.41 – 7.35 (m, 1H), 6.89 – 6.60 (m, 2H), 3.02 (s, 6H), 2.79 (s, 3H); 13C NMR (100 MHz, CDCl3) *δ* ppm 150.0, 143.1, 140.0, 137.4, 132.6, 124.4, 124.2, 122.5, 121.9, 116.5, 111.8, 110.1, 95.6, 80.3, 40.0, 15.2; HRMS (ESI) calc. C19H17NS [M+H]+: 292.1154, found: 292.1151.

**3-((4-Fluorophenyl)ethynyl)-2-methylbenzo[*b*]thiophene (4d):**

1H NMR (400 MHz, CDCl3) *δ* ppm 7.90 (t, *J* = 8.7 Hz, 1H), 7.78 – 73 (m, 1H), 7.65 – 7.49 (m, 2H), 7.43 (q, *J* = 7.9, 6.4 Hz, 1H), 7.38 – 7.30 (m, 1H), 7.12 – 7.00 (m, 2), 2.73 (s, 3H); 13C NMR (100 MHz, CDCl3) *δ* ppm 162.5 (d, *J* = 249.6 Hz), 145.0, 139.8, 137.5, 133.4 (d, *J* = 8.3 Hz), 124.6, 124.5, 122.4, 122.0, 119.5 (d, *J* = 3.3 Hz), 116.0, 115.7 (d, *J* = 21.9 Hz), 93.4, 82.3, 15.3; HRMS (ESI) calc. C17H11FS [M+H]+: 267.0638, found: 267.0634.

**3-((4-Chlorophenyl)ethynyl)-2-methylbenzo[*b*]thiophene (4e):**

1H NMR (400 MHz, CDCl3) *δ* ppm 7.90 (d, *J* = 7.9 Hz, 1H), 7.76 (d, *J* = 8.0 Hz, 1H), 7.58 – 7.50 (m, 2H), 7.46-7.41 (m, 1H), 7.40 – 7.31 (m, 3H), 2.74 (s, 3H); 13C NMR (100 MHz, CDCl3) *δ* ppm 145.3, 139.7, 137.5, 134.1, 132.7, 128.7, 124.7, 124.5, 122.3, 122.0, 121.9, 115.5, 93.4, 83.6, 15.3; HRMS (ESI) calc. C17H11ClS [M+H]+: 283.0343, found: 283.0339.

**3-((4-Bromophenyl)ethynyl)-2-methylbenzo[*b*]thiophene (4f):**

1H NMR (400 MHz, CDCl3) *δ* ppm 7.87 (d, *J* = 8.0 Hz, 1H), 7.75 (d, *J* = 8.0 Hz, 1H), 7.56 – 7.49 (m, 2H), 7.48 – 7.39 (m, 3H), 7.34 (t, *J* = 7.6 Hz, 1H), 2.72 (s, 3H); 13C NMR (100 MHz, CDCl3) *δ* ppm 145.3, 139.7, 137.5, 132.9, 131.6, 124.7, 124.5, 122.4, 122.4, 122.0, 115.5, 93.4, 83.8, 15.4; HRMS (ESI) calc. C17H11BrS [M+H]+: 326.9838, found: 326.9833.

**3-((3-Chlorophenyl)ethynyl)-2-methylbenzo[*b*]thiophene (4g):**

1H NMR (400 MHz, CDCl3) *δ* ppm 7.90 (d, *J* = 7.8 Hz, 1H), 7.76 (d, *J* = 8.0 Hz, 1H), 7.62 (t, *J* = 1.5 Hz, 1H), 7.51 – 7.46 (m, 1H), 7.47 – 7.41 (m, 1H), 7.39 – 7.28 (m, 3H), 2.74 (s, 3H); 13C NMR (100 MHz, CDCl3) *δ* ppm 145.7, 139.8, 137.6, 134.3, 131.4, 129.7, 129.7, 128.5, 125.2, 124.8, 124.6, 122.4, 122.1, 115.4, 93.2, 84.0, 15.4; HRMS (ESI) calc. C17H11ClS [M+H]+: 283.0343, found: 283.0339.

**3-((3,5-Difluorophenyl)ethynyl)-2-methylbenzo[*b*]thiophene (4h):**

1H NMR (400 MHz, CDCl3) *δ* ppm 7.90 (d, *J* = 7.9 Hz, 1H), 7.77 (d, *J* = 8.0 Hz, 1H), 7.50 – 7.43 (m, 1H), 7.40 – 7.34 (m, 1H), 7.18 – 7.10 (m, 2H), 6.89 – 6.81 (m, 1H), 2.73 (s, 3H); 13C NMR (100 MHz, CDCl3) *δ* 162.9 (d, *J* = 247.3 Hz), 162.8 (d, *J* = 247.4 Hz), 146.4, 139.7, 137.6, 126.2 (t, *J* = 11.8 Hz), 124.8 (d, *J* = 18.1 Hz), 122.3 (d, *J* = 22.7 Hz), 115.0, 114.5 (d, *J* = 11.6 Hz), 114.5 (d, *J* = 26.7 Hz), 104.3 (t, *J* = 25.4 Hz), 92.5 (t, *J* = 3.9 Hz), 84.8, 15.4; HRMS (ESI) calc. C17H10F2S [M+H]+: 285.0544, found: 285.0541.

**2-((2-Methylbenzo[b]thiophen-3-yl)ethynyl)pyridine (4i):**

1H NMR (400 MHz, CDCl3) *δ* ppm 8.66 – 8.62 (m, 1H), 7.94 (d, *J* = 7.9 Hz, 1H), 7.73 (d, *J* = 7.9 Hz, 1H), 7.71 – 7.64 (m, 1H), 7.60 – 7.55 (m, 1H), 7.43 – 7.37 (m, 1H), 7.35 – 7.29 (m, 1H), 7.27 – 7.20 (m, 1H), 2.75 (s, 3H); 13C NMR (100 MHz, CDCl3) *δ* ppm 150.0, 146.8, 143.6, 139.7, 137.4, 136.1, 127.2, 124.7, 124.5, 122.6, 122.5, 121.9, 114.9, 93.9, 82.6, 15.4; HRMS (ESI) calc. C16H11NS [M+H]+: 250.0685, found: 250.0683.

**1-Benzyl-3-phenylisoquinoline (3a):**

Yield: 47 mg (80%), white solid. M.p.: 64.8 –  ºC. 1H NMR (500 MHz, CDCl3) *δ* ppm 8.18 (d, *J* = 7.0 Hz, 2H), 8.12 (d, *J* = 8.5 Hz, 1H), 7.95 (s, 1H), 7.81 (d, *J* = 8.2 Hz, 1H), 7.57 (t, *J* = 7.5 Hz, 1H), 7.51 – 7.42 (m, 3H), 7.39 (t, *J* = 7.3Hz, 1H), 7.34 (d, *J* = 7.5 Hz, 2H), 7.27 – 7.20 (m, 2H), 7.15 (t, *J* = 6.8 Hz, 1H), 4.73 (s, 2H); 13C NMR (125 MHz, CDCl3) *δ* ppm160.0, 150.0, 139.8, 139.7, 137.5, 130.0, 128.8, 128.8, 128.5, 128.5, 127.9, 127.1, 127.0, 126.3, 126.3, 125.9, 115.6, 42.3; IR (KBr, cm-1): *ν* = 1762, 1577, 1497, 1369, 1243, 1059, 755, 689; HRMS (ESI) calc. C22H17N [M+H]+: 296.1434, found: 296.1430.

**1-(4-Methylbenzyl)-3-phenylisoquinoline (3b):**

Yield: 37 mg (60%), white solid. M.p.: 85.6 – 87.3 ºC.1H NMR (400 MHz, CDCl3) *δ* ppm 8.24 (d, *J* = 7.7 Hz, 2H), 8.18 (d, *J* = 8.4 Hz, 1H), 8.00 (s, 1H), 7.86 (d, *J* = 8.2 Hz, 1H), 7.62 (t, *J* = 7.5 Hz, 1H), 7.55 (t, *J* = 7.5 Hz, 2H), 7.50 (t, *J* = 7.7 Hz, 1H), 7.45 (t, *J* = 7.3 Hz, 1H), 7.30 (d, *J* = 7.6 Hz, 2H), 7.11 (d, *J* = 7.6 Hz, 2H), 4.75 (s, 2H), 2.32 (s, 3H); 13C NMR (100 MHz, CDCl3) *δ* ppm 160.1, 149.8, 139.7, 137.4, 136.5, 135.6, 129.8, 129.1, 128.7, 128.5, 128.3, 127.7, 127.0, 126.9, 126.1, 125.8, 115.5, 41.8, 21.0; IR (KBr, cm-1): *ν* = 2991, 1764, 1567, 1378, 1243, 1056, 691; HRMS (ESI) calc. C23H19N [M+H]+: 310.1590, found: 310.1586.

**1-(4-Methoxybenzyl)-3-phenylisoquinoline (3c):**

Yield: 51 mg (78%), white solid. M.p.: 77.8 – 79.3 ºC. 1H NMR (400 MHz, CDCl3) *δ* ppm 8.26 (d, *J* = 7.6 Hz, 2H), 8.18 (d, *J* = 8.4 Hz, 1H), 8.00 (s, 1H), 7.86 (d, *J* = 8.2 Hz, 1H), 7.62 (t, *J* = 7.5 Hz, 1H), 7.56 (t, *J* = 7.5 Hz, 2H), 7.51 (t, *J* = 7.8 Hz, 1H), 7.46 (t, *J* = 7.3 Hz, 1H), 7.34 (d, *J* = 8.2 Hz, 2H), 6.85 (d, *J* = 8.3 Hz, 2H), 4.73 (s, 2H), 3.77 (s, 3H); 13C NMR (100 MHz, CDCl3) *δ* ppm 160.2 157.9, 149.8, 139.7, 137.4, 131.6, 129.8, 129.6, 128.7, 128.3, 127.7, 126.9, 126.8, 126.1, 125.7, 115.4, 113.8, 55.1, 41.3; IR (KBr, cm-1): *ν* = 1763, 1579, 1508, 1383, 1244, 1038, 909, 692; HRMS (ESI) calc. C23H19NO [M+H]+: 326.1539, found: 326.1535.

**1-(4-(*tert*-Butyl)benzyl)-3-phenylisoquinoline (3d):**

Yield: 53 mg (76%), yellow oil. 1H NMR (400 MHz, CDCl3) *δ* ppm 8.18 (t, *J* = 7.1 Hz, 3H), 7.95 (s, 1H), 7.83 (d, *J* = 8.0 Hz, 1H), 7.59 (t, *J* = 7.2 Hz, 1H), 7.48 (q, *J* = 6.8 Hz, 3H), 7.39 (t, *J* = 7.1 Hz, 1H), 7.29 (s, 4H), 4.70 (s, 2H), 1.26 (s, 9H); 13C NMR (100 MHz, CDCl3) *δ* ppm 160.1, 149.9, 148.9, 139.8, 137.5, 136.5, 129.8, 128.7, 128.4, 128.3, 127.8, 127.0, 126.8, 126.3, 125.9, 125.3, 115.4, 41.6, 34.3, 31.3; IR (KBr, cm-1): *ν* = 2957, 1762, 1569, 1504, 1374, 1245, 1051, 758, 692; HRMS (ESI) calc. C26H25N [M+H]+: 352.2060, found: 353.2056.

**1-(3-Methylbenzyl)-3-phenylisoquinoline (3e):**

Yield: 26 mg (42%), yellow oil. 1H NMR (500 MHz, CDCl3*) δ* ppm 8.20 (dd, *J* = 6.8, 3.8 Hz, 2H), 8.13 (d, *J* = 8.4 Hz, 1H), 7.95 (s, 1H), 7.81 (d, *J* = 8.1 Hz, 1H), 7.58 (t, *J* = 7.5 Hz, 1H), 7.527.47 (m, 2H), 7.45 (t, *J* = 7.5 Hz, 1H), 7.40 (dd, *J* = 8.5, 5.9 Hz, 1H), 7.19 – 7.11 (m, 3H), 6.98 (d, *J* = 2.8 Hz, 1H), 4.70 (s, 2H), 2.27 (s, 3H); 13C NMR (125 MHz, CDCl3) *δ* ppm 160.0, 149.8, 139.7, 139.5, 138.0, 137.4, 129.9, 129.4, 128.7, 128.4, 128.3, 127.7, 127.0, 126.9, 126.9, 126.2, 125.8, 125.7, 115.5, 42.2, 21.4; IR (KBr, cm-1): *ν* = 3051, 2924, 1760, 1573, 1494, 1376, 1243, 1052, 876, 763, 691; HRMS (ESI) calc. C23H19N [M+H]+: 310.1590, found: 310.1586.

**1-(3-Fluorobenzyl)-3-phenylisoquinoline (3f):**

Yield: 9 mg (14%), white solid. M.p.: 62.5 – 64.1 ºC. 1H NMR (500 MHz, CDCl3) *δ* ppm 8.07 (d, *J* = 7.5 Hz, 2H), 7.96 (d, *J* = 8.4 Hz, 1H), 7.86 (s, 1H), 7.72 (d, *J* = 8.2 Hz, 1H), 7.49 (t, *J* = 7.5 Hz, 1H), 7.43 – 7.34 (m, 3H), 7.30 (t, *J* = 7.3 Hz, 1H), 7.10 (dd, *J* = 14.2, 7.6 Hz, 1H), 7.02 (d, *J* = 7.6 Hz, 1H), 6.94 (d, *J* = 10.0 Hz, 1H), 6.75 (t, *J* = 8.3 Hz, 1H), 4.61 (s, 2H); 13C NMR (125 MHz, CDCl3) *δ* ppm 162.9 (d, *J* = 240.0 Hz), 159.1, 149.9, 142.0 (d, *J* = 5.9 Hz), 139.4, 137.4, 130.0, 129.8 (d, *J* = 6.7 Hz), 128.7, 128.5, 127.8, 127.0, 126.9, 126.1, 125.5, 124.4 (d, *J* = 2.6 Hz), 115.7 (d, *J* = 2.2 Hz), 115.6, 113.1 (d, *J* = 21.0 Hz), 41.7; IR (KBr, cm-1): *ν* = 3055, 1764, 1579, 1490, 1443, 1245, 1137, 947, 878, 772, 690; HRMS (ESI) calc. C22H16FN [M+H]+: 314.1340, found: 314.1335.

**1-(Naphthalen-2-ylmethyl)-3-phenylisoquinoline (3g):**

Yield: 45 mg (65%), white solid. M.p.: 120.5 – 121.9 ºC. 1H NMR (500 MHz, CDCl3) *δ* ppm 8.28 (d, *J* = 7.6 Hz, 2H), 8.22 (d, *J* = 8.4 Hz, 1H), 8.03 (s, 1H), 7.87 (d, *J* = 8.1 Hz, 1H), 7.80 (t, *J* = 9.4 Hz, 4H), 7.66 – 7.54 (m, 4H), 7.52 – 7.39 (m, 4H), 4.96 (s, 2H); 13C NMR (125 MHz, CDCl3) *δ* ppm 159.8, 149.9, 139.6, 137.5, 137.2, 133.5, 132.1, 129.9, 128.7, 128.4, 128.0, 127.8, 127.6, 127.3, 127.0, 126.9, 126.3, 125.9, 125.8, 125.3, 115.7, 42.4; IR (KBr, cm-1): *ν* = 2991, 1762, 1584, 1375, 1243, 1055, 752, 692; HRMS (ESI) calc. C26H19N[M+H]+: 346.1590, found: 346.1587.

**1-Benzyl-3-(*p*-tolyl)isoquinoline (3h):**

Yield: 30 mg (48%), white solid. M.p.: 82.5 – 83.7 ºC. 1H NMR (400 MHz, CDCl3) *δ* ppm 8.20 (d, *J* = 7.9 Hz, 3H), 8.02 (s, 1H), 7.88 (d, *J* = 8.1 Hz, 1H), 7.65 (t, *J* = 7.4 Hz, 1H), 7.52 (t, *J* = 7.6 Hz, 1H), 7.46 (d, *J* = 7.4 Hz, 2H), 7.41 (d, *J* = 7.7 Hz, 2H), 7.35 (t, *J* = 7.4 Hz, 2H), 7.27 (q, *J* = 7.2 Hz, 1H), 4.83 (s, 2H), 2.52 (s, 3H); 13C NMR (100 MHz, CDCl3) *δ* ppm 159.7, 149.8, 139.6, 138.2, 137.2, 136.8, 131.9, 129.7, 129.4, 128.7, 128.3, 127.6, 126.8, 126.6, 126.1, 126.0, 125.7, 114.9, 42.1, 21.2; IR (KBr, cm-1): *ν* = 3061, 3027, 2922, 1744, 1615, 1568, 1500, 1443, 1377, 1245, 1047, 823, 745, 703; HRMS (ESI) calc. C23H19N [M+H]+: 310.1590, found: 310.1587.

**1-Benzyl-3-(4-(*tert*-butyl)phenyl)isoquinoline (3i):**

Yield: 53 mg (75%), yellow solid. M.p.: 89.5 – 91.1 ºC. 1H NMR (500 MHz, CDCl3) *δ* 8.12 (d, *J* = 8.4 Hz, 3H), 7.93 (s, 1H), 7.81 (d, *J* = 8.2 Hz, 1H), 7.57 (t, *J* = 7.4 Hz, 1H), 7.53 (d, *J* = 8.4 Hz, 2H), 7.44 (t, *J* = 7.6 Hz, 1H), 7.35 (d, *J* = 7.4 Hz, 2H), 7.23 (dd, *J* = 14.1, 6.4 Hz, 2H), 7.15 (t, *J* = 7.3 Hz, 1H), 4.73 (s, 2H), 1.38 (s, 9H); 13C NMR (126 MHz, CDCl3) *δ* 159.8, 151.5, 149.9, 139.6, 137.5, 136.9, 131.9, 129.8, 128.7, 128.4, 127.7, 126.7, 126.1, 126.1, 125.8, 125.7, 115.1, 42.2, 34.6, 31.3; IR (KBr, cm-1): *ν* = 2957, 1756, 1575, 1451, 1374, 1247, 1051, 837, 745, 699; HRMS (ESI) calc. C26H25N [M+H]+: 352.2060, found: 352.2056.

**1-Benzyl-3-(4-methoxyphenyl)isoquinoline (3j):**

Yield: 40 mg (61%), white solid. M.p.: 130.7 – 131.3 ºC. 1H NMR (400 MHz, CDCl3) *δ* ppm 8.12 (t, *J* = 9.0 Hz, 3H), 7.87 (s, 1H), 7.79 (d, *J* = 8.2 Hz, 1H), 7.56 (t, *J* = 7.4 Hz, 1H), 7.43 (t, *J* = 7.6 Hz, 1H), 7.35 (d, *J* = 7.4 Hz, 2H), 7.24 (t, *J* = 7.6 Hz, 2H), 7.15 (t, *J* = 7.3 Hz, 1H), 7.02 (d, *J* = 8.5 Hz, 2H), 4.73 (s, 2H), 3.85 (s, 3H); 13C NMR (100 MHz, CDCl3) *δ* ppm 160.1, 159.7, 149.5, 139.5, 137.6, 132.1, 129.9, 128.7, 128.4, 128.2, 127.6, 126.6, 126.1, 125.8, 125.8, 114.5, 114.1, 55.3, 42.0; IR (KBr, cm-1): *ν* = 1571, 1601, 1510, 1245, 1174, 1042, 833, 741; HRMS (ESI) calc. C23H19NO [M+H]+: 326.1539, found: 326.1535.

**3-([1,1'-Biphenyl]-4-yl)-1-benzylisoquinoline (3k):**

Yield: 53 mg (71%), white solid. M.p.: 166.7 – 167.9 ºC. 1H NMR (400 MHz, CDCl3) *δ* ppm 8.27 (d, *J* = 8.3 Hz, 2H), 8.15 (d, *J* = 8.4 Hz, 1H), 8.01 (s, 1H), 7.85 (d, *J* = 8.2 Hz, 1H), 7.74 (d, *J* = 8.3 Hz, 2H), 7.70 – 7.65 (m, 2H), 7.61 (t, *J* = 7.5 Hz, 1H), 7.51 – 7.40 (m, 3H), 7.36 (t, *J* = 7.3 Hz, 3H), 7.28 – 7.20 (m, 2H), 7.17 (t, *J* = 7.3 Hz, 1H), 4.77 (s, 2H); 13C NMR (100 MHz, CDCl3) *δ* ppm 159.9, 149.3, 141.0 140.7, 139.5, 138.5, 137.4, 129.9, 128.8, 128.7, 128.4, 127.7, 127.4, 127.3, 127.3, 127.0, 126.9, 126.2, 126.2, 125.7, 115.4, 42.2; IR (KBr, cm-1): *ν* = 2984, 1762, 1584, 1485, 1379, 1056, 837, 695; HRMS (ESI) calc. : C28H21N [M+H]+: 372.1747, found: 372.1744.

**1-Benzyl-3-(3-(*tert*-butyl)phenyl)isoquinoline (3l):**

Yield: 58 mg (82%), yellow oil. 1H NMR (500 MHz, CDCl3) *δ* ppm 8.23 (s, 1H), 8.08 (d, *J* = 6.2 Hz, 1H), 7.96 (s, 1H), 7.91 (d, *J* = 3.3 Hz, 1H), 7.75 (d, *J* = 6.3 Hz, 1H), 7.54 – 7.47 (m, 1H), 7.44 – 7.32 (m, 5H), 7.23 (d, *J* = 6.2 Hz, 2H), 7.14 (d, *J* = 6.2 Hz, 1H), 4.70 (s, 2H), 1.40 (s, 9H); 13C NMR (125 MHz, CDCl3) *δ* ppm 159.7, 151.4, 150.3, 139.5, 139.3, 137.4, 129.7, 128.9, 128.4, 128.3, 127.7, 126.7, 126.1, 126.0, 125.6, 125.5, 124.1, 124.1, 115.3, 42.0, 34.8, 31.4; IR (KBr, cm-1): *ν* = 3060, 2960, 1574, 1490, 1373, 1252, 10278, 882, 799, 749, 701; HRMS (ESI) calc. C26H25N [M+H]+: 352.2060, found: 352.2056.

**1-Benzyl-6-methyl-3-phenylisoquinoline (3m):**

Yield: 42 mg (68%), white solid. M.p.: 81.9 – 83.4 ºC. 1H NMR (400 MHz, CDCl3) *δ* ppm 8.16 (d, *J* = 7.9 Hz, 2H), 7.98 (d, *J* = 8.6 Hz, 1H), 7.84 (s, 1H), 7.54 (s, 1H), 7.47 (t, *J* = 7.6 Hz, 2H), 7.40 – 7.30 (m, 3H), 7.28 – 7.19 (m, 3H), 7.13 (t, *J* = 7.3 Hz, 1H), 4.68 (s, 2H), 2.43 (s, 3H); 13C NMR (100 MHz, CDCl3) *δ* ppm 159.5, 149.9, 140.0, 139.8, 139.7, 137.8, 129.1, 128.7, 128.6, 128.4, 128.3, 126.9, 126.6, 126.1, 125.6, 124.6, 115.1, 42.2, 21.7 (d, *J* = 2.5 Hz); IR (KBr, cm-1): *ν* = 3051, 2918, 2846, 1750, 1579, 1493, 1375, 1243, 1048, 895, 767, 693; HRMS (ESI) calc. C23H19N [M+H]+: 310.1590, found: 310.1587.

**1-Benzyl-8-fluoro-3-phenylisoquinoline (3n):**

Yield: 23 mg (36%), white solid. M.p.: 86.2 – 87.9 ºC. 1H NMR (400 MHz, CDCl3) *δ* ppm 8.22 (d, *J* = 7.3 Hz, 2H), 7.97 (d, *J* = 2.6 Hz, 1H), 7.63 (d, *J* = 8.1 Hz, 1H), 7.57 – 7.50 (m, 3H), 7.45 (t, *J* = 7.3 Hz, 1H), 7.40 (d, *J* = 7.7 Hz, 2H), 7.29 (t, *J* = 7.6 Hz, 2H), 7.20 (t, *J* = 7.3 Hz, 1H), 7.14 (dd, *J* = 12.5, 7.6 Hz, 1H), 4.88 (d, *J* = 3.4 Hz, 2H); 13C NMR (100 MHz, CDCl3) *δ* ppm 160.7, 158.2, 157.8 (d, *J* = 7.0 Hz), 150.2 (d, *J* = 1.8 Hz), 140.0 (d, *J* = 3.7 Hz), 139.7, 138.9, 130.2 (d, *J* = 9.4 Hz), 128.9 (d, *J* = 1.6 Hz), 128.7, 128.2, 126.9, 126.0, 123.8 (d, *J* = 4.3 Hz), 116.9 (d, *J* = 14.1 Hz), 114.6 (d, *J* = 3.6 Hz), 112.3 (d, *J* = 23.6 Hz), 45.12 (d, *J* = 9.6 Hz); IR (KBr, cm-1): *ν* = 3060, 2923, 2857, 1761, 1627, 1567, 1493, 1450, 1348, 1240, 1028, 865, 775, 691; HRMS (ESI) calc. C22H16FN [M+H]+: 314.1340, found: 314.1336.

**1-Benzyl-3,6-diphenylisoquinoline (3o):**

Yield: 46 mg (62%), yellow solid. M.p.: 104.6 – 106.2 ºC. 1H NMR (500 MHz, CDCl3) *δ* ppm 8.19 (d, *J* = 7.7 Hz, 2H), 8.15 (d, *J* = 8.7 Hz, 1H), 7.98 (s, 2H), 7.68 (d, *J* = 8.8 Hz, 1H), 7.65 (d, *J* = 7.6 Hz, 2H), 7.52 7.43 (m, 4H), 7.41  (m, 4H), 7.25 (t, *J* = 7.5 Hz, 2H), 7.20 7.113 (m, 1H), 4.73 (s, 2H); 13C NMR (125 MHz, CDCl3) *δ* ppm 159.8, 150.3, 142.5, 140.1, 139.6, 139.6, 137.8, 128.9, 128.7, 128.7, 128.4, 128.0, 127.4, 127.0, 126.6, 126.3, 126.2, 125.4, 125.2, 115.7, 42.2; IR (KBr, cm-1): *ν* = 3047, 2925, 1614, 1575, 1491, 1449, 1244, 901, 760, 695; HRMS (ESI) calc. C28H21N [M+H]+: 372.1747, found: 372.1742.

**1,3,7-Triphenylisoquinoline (3p):**

Yield: 45 mg (60%), white solid. M.p.: 135.3 – 136.8 ºC. 1H NMR (500 MHz, CDCl3) *δ* ppm 8.32 (s, 1H), 8.19 (d, *J* = 7.5 Hz, 2H), 7.96 (s, 1H), 7.85 (dd, *J* = 18.5, 8.4 Hz, 2H), 7.57 (d, *J* = 7.4 Hz, 2H), 7.52 – 7.43 (m, 4H), 7.41 – 7.35 (m, 4H), 7.27 (t, *J* = 7.4 Hz, 2H), 7.22 – 7.14 (m, 1H), 4.78 (s, 2H); 13C NMR (126 MHz, CDCl3) *δ* ppm 160.2, 149.8, 140.6, 139.6, 139.6, 136.6, 129.6, 129.0, 128.8, 128.7, 128.5, 128.4, 128.3, 127.7, 127.3, 126.9, 126.4, 126.2, 123.7, 115.2, 42.3; IR (KBr, cm-1): *ν* = 3004, 1763, 1565, 1483, 1382, 1243, 1057, 878, 759, 691; HRMS (ESI) calc. C28H21N [M+H]+: 372.1747, found: 372.1744.

**1-Benzyl-3-phenylisoquinoline-4-carbonitrile (3q):**

Yield: 47 mg (74%), white solid. M.p.: 174.6 – 175.7 ºC. 1H NMR (400 MHz, CDCl3) *δ* 8.27 (t, *J* = 8.8 Hz, 2H), 8.10 (d, *J* = 6.9 Hz, 2H), 7.82 (t, *J* = 7.6 Hz, 1H), 7.63 (t, *J* = 7.6 Hz, 1H), 7.59 – 7.48 (m, 3H), 7.34 – 7.23 (m, 4H), 7.19 (t, *J* = 7.1 Hz, 1H), 4.75 (s, 2H); 13C NMR (100 MHz, CDCl3) *δ* 164.1, 156.2, 138.2, 137.8, 136.7, 132.3, 129.9, 129.5, 128.7, 128.6, 128.5, 126.6, 126.4, 125.4, 124.8, 117.2, 101.1, 42.5; IR (KBr, cm-1): *ν* = 3361, 2920, 2852, 1744, 1657, 1549, 1452, 1375, 1244, 1049, 760, 699; HRMS (ESI) calc. C23H16N2 [M+H]+: 321.1386, found: 321.1383.

**1-Benzyl-3-(pyridin-2-yl)isoquinoline-4-carbonitrile (3r):**

Yield: 44 mg (69%), white solid. M.p.: 167.8 – 169.3 ºC. 1H NMR (400 MHz, CDCl3) *δ* ppm 8.85 (d, *J* = 4.4 Hz, 1H), 8.43 (d, *J* = 8.4 Hz, 1H), 8.38 (d, *J* = 7.9 Hz, 1H), 8.26 (d, *J* = 8.4 Hz, 1H), 7.91  7.80 (m, 2H), 7.66 (t, *J* = 7.6 Hz, 1H), 7.41 (t, *J* = 6.0 Hz, 1H), 7.32  7.24 (m, 4H), 7.20 (t, *J* = 6.8 Hz, 1H), 4.77 (s, 2H); 13C NMR (100 MHz, CDCl3) *δ* ppm 163.5, 154.9, 152.9, 148.9, 138.2, 137.0, 136.9, 132.3, 128.8, 128.7, 128.6, 126.6, 126.3, 125.8, 125.7, 124.5, 123.6, 116.7, 101.6, 42.3; IR (KBr, cm-1): *ν* = 3118, 2993, 1764, 1583, 1381, 1243, 1057, 919; HRMS (ESI) calc. C22H15N3 [M+H]+: 322.1339, found: 322.1337.

**1-Benzyl-3,4-diphenylisoquinoline (3s):**

Yield: 33 mg (45%), white solid. M.p.: 116.8 – 118.0 ºC. 1H NMR (500 MHz, CDCl3) *δ* ppm 8.21 (d, *J* = 8.3 Hz, 1H), 7.64 (d, *J* = 8.0 Hz, 1H), 7.55 – 7.46 (m, 3H), 7.43 – 7.39 (m, 4H), 7.37 – 7.31 (m, 3H), 7.28 (t, *J* = 7.6 Hz, 2H), 7.23 (d, *J* = 5.9 Hz, 2H), 7.21 – 7.16 (m, 3H), 4.78 (s, 2H); 13C NMR (125 MHz, CDCl3) *δ* ppm 159.2, 149.3, 140.8, 139.6, 137.5, 136.7, 131.3, 130.4, 129.8, 129.7, 128.7, 128.5, 128.2, 127.6, 127.2, 127.0, 126.6, 126.4, 126.2, 125.7, 42.3; IR (KBr, cm-1): *ν* = 3062, 2925, 1751, 1600, 1557, 1495, 1444, 1376, 1242, 1043, 761, 700; HRMS (ESI) calc. C28H21N [M+H]+: 372.1747, found: 372.1743.

**1-Benzyl-4-methyl-3-phenylisoquinoline (3t):**

Yield: 17 mg (28%), yellow solid. M.p.: 91.5 – 92.8 ºC. 1H NMR (400 MHz, CDCl3) *δ* ppm 8.17 (d, *J* = 8.4 Hz, 1H), 8.06 (d, *J* = 8.5 Hz, 1H), 7.75 – 7.59 (m, 3H), 7.55 – 7.48 (m, 3H), 7.46 – 7.39 (m, 1H), 7.33 (d, *J* = 7.2 Hz, 2H), 7.25 (t, *J* = 7.5 Hz, 2H), 7.16 (t, *J* = 7.3 Hz, 1H), 4.72 (s, 2H), 2.64 (s, 3H); 13C NMR (100 MHz, CDCl3) *δ* ppm 157.4, 150.7, 141.5, 139.9, 136.9, 130.0, 129.7, 128.5, 128.4, 128.1, 127.5, 126.4, 126.4, 126.1, 125.8, 124.2, 122.9, 42.2, 15.5; IR (KBr, cm-1): *ν* = 2923, 1761, 1562, 1496, 1448, 1379, 1243, 755, 700; HRMS (ESI) calc. C23H19N [M+H]+: 310.1590, found: 310.1586.

**1-Benzyl-3-phenylbenzo[4,5]thieno[3,2-*c*]pyridine (5a):**

Yield: 63 mg (90%), white solid. M.p.: 142.5 143.8 ºC. 1H NMR (400 MHz, CDCl3) *δ* 8.20 – 8.16 (m, 1H), 8.13 (d, *J* = 7.0 Hz, 2H), 7.90 – 7.79 (m, 1H), 7.47 (t, *J* = 7.4 Hz, 1H), 7.43 – 7.36 (m, 3H), 7.29 – 7.20 (m, 2H), 7.20 – 7.14 (m, 1H), 4.89 (s, 2H); 13C NMR (100 MHz, CDCl3) *δ* ppm 155.1, 152.2, 150.0, 139.0, 138.9, 138.2, 133.6, 128.9, 128.9, 128.7, 128.6, 128.5, 127.1, 126.7, 126.2, 125.2, 125.0, 122.8, 112.3, 43.7; IR (KBr, cm-1): *ν* = 2992, 1764, 1571, 1374, 1243, 1056, 756, 692; HRMS (ESI) calc. C24H17NS [M+H]+: 352.1154, found: 352.1151.

**1-(4-Methoxybenzyl)-3-phenylbenzo[4,5]thieno[3,2-*c*]pyridine (5b):**

Yield: 54 mg (71%), yellowish green solid. M.p.: 203.0 – 204.3 ºC. 1H NMR (400 MHz, CDCl3) *δ* ppm 8.23 (dd, *J* = 7.1, 1.8 Hz, 1H), 8.16 (d, *J* = 7.2 Hz, 3H), 7.88 (dd, *J* = 7.0, 1.9 Hz, 1H), 7.62 – 7.36 (m, 5H), 7.20 (d, *J* = 8.8 Hz, 2H), 6.94 – 6.70 (m, 2H), 4.84 (s, 2H), 3.75 (s, 3H); 13C NMR (100 MHz, CDCl3) *δ* ppm 158.1, 155.6, 152.3, 149.9, 139.1, 139.0, 133.7, 130.3, 129.6, 128.8, 128.8, 127.1, 126.7, 125.2, 125.1, 122.8, 114.0, 112.2, 55.2, 42.9; IR (KBr, cm-1): *ν* = 2991, 1764, 1692, 1646, 1559, 1514, 1383, 1243, 1053, 750, 670; HRMS (ESI) calc. C25H19NOS [M+H]+: 382.1260, found: 382.1255.

***N*,*N*-Dimethyl-4-((3-phenylbenzo[4,5]thieno[3,2-*c*]pyridin-1-yl)methyl)aniline (5c):**

Yield: 65 mg (83%), white solid. M.p.: 147.7 – 149.1 ºC. 1H NMR (400 MHz, CDCl3) *δ* ppm 8.33 – 8.28 (m, 1H), 8.22 – 8.17 (m, 2H), 8.15 (s, 1H), 7.95 – 7.77 (m, 1H), 7.52 (t, *J* = 7.5 Hz, 2H), 7.48 – 7.41 (m, 3H), 7.20 (d, *J* = 8.7 Hz, 2H), 6.70 (d, *J* = 8.7 Hz, 2H), 4.83 (s, 2H), 2.89 (s, 6H); 13C NMR (100 MHz, CDCl3) *δ* ppm 156.0, 152.2, 149.8, 149.1, 139.1, 138.9, 133.7, 129.2, 128.8, 128.7, 128.7, 127.1, 126.5, 126.2, 125.2, 125.1, 122.6, 113.0, 112.0, 42.8, 40.7; IR (KBr, cm-1): *ν* = 3060, 2920, 1763, 1676, 1611, 1570, 1519, 1435, 1353, 1239, 1062, 941, 811, 759, 692; HRMS (ESI) calc. C26H22N2S [M+H]+: 395.1576, found: 395.1573.

**1-(4-Fluorobenzyl)-3-phenylbenzo[4,5]thieno[3,2-*c*]pyridine (5d):**

Yield: 49 mg (67%), yellowish green solid. M.p.: 157.5 – 158.9 ºC. 1H NMR (400 MHz, CDCl3) *δ* ppm 8.23 – 8.12 (m, 4H), 7.96 – 7.82 (m, 1H), 7.59 – 7.40 (m, 5H), 7.27 (t, *J* = 7.0 Hz, 2H), 7.00 (t, *J* = 8.7 Hz, 2H), 4.87 (s, 2H); 13C NMR (100 MHz, CDCl3) *δ* ppm 161.47 (d, *J* = 242.7 Hz), 154.9, 152.2, 150.0, 139.0, 138.8, 133.8 (d, *J* = 3.2 Hz), 133.4, 130.1, 130.1, 128.9, 128.7, 127.0, 126.7, 125.1, 124.8, 122.8, 115.3 (d, *J* = 21.1 Hz), 112.2, 42.8; IR (KBr, cm-1): *ν* = 3317, 3058, 2990, 1764, 1572, 1506, 1434, 1374, 1237, 1158, 1058, 915, 823, 762, 691; HRMS (ESI) calc. C24H16FNS [M+H]+: 370.1060 , found: 370.1058.

**1-(4-Chlorobenzyl)-3-phenylbenzo[4,5]thieno[3,2-*c*]pyridine (5e):**

Yield: 50 mg (65%), white solid. M.p.: 205.8 – 207.3 ºC. 1H NMR (400 MHz, CDCl3) *δ* ppm 8.26 – 8.05 (m, 4H), 7.87 (d, *J* = 7.6 Hz, 1H), 7.55 – 7.37 (m, 5H), 7.25 – 7.17 (m, 4H), 4.84 (s, 2H); 13C NMR (100 MHz, CDCl3) *δ* ppm 154.6, 152.3, 145.0, 139.1, 138.9, 136.7, 133.5, 132.1, 130.0, 128.9, 128.8, 128.6, 127.1, 126.8, 125.2, 124.8, 122.9, 112.3, 43.1; IR (KBr, cm-1): *ν* = 2920, 1765, 1571, 1486, 1243, 1061, 693, 629; HRMS (ESI) calc. C24H16ClNS [M+H]+: 386.0765, found: 386.0761.

**1-(4-Bromobenzyl)-3-phenylbenzo[4,5]thieno[3,2-*c*]pyridine (5f):**

Yield: 49 mg (57%), whitesolid. M.p.: 186.1 – 187.8 ºC. 1H NMR (400 MHz, CDCl3) *δ* ppm 8.30 – 8.06 (m, 4H), 7.89 (d, *J* = 7.5 Hz, 1H), 7.52 – 7.38 (m, 7H), 7.17 (t, *J* = 8.8 Hz, 2H), 4.85 (s, 2H); 13C NMR (100 MHz, CDCl3) *δ* ppm 154.5, 152.3, 150.0, 139.1, 138.9, 137.2, 133.4, 131.6, 130.4, 129.0, 128.8, 127.1, 126.8, 125.2, 124.8, 122.9, 120.2, 112.4, 43.2; IR (KBr, cm-1): *ν* = 2991, 1764, 1566, 1485, 1376, 1243, 1058, 977, 909; HRMS (ESI) calc. C24H16BrNS [M+H]+: 430.0260, found: 430.0255.

**1-(3-Chlorobenzyl)-3-phenylbenzo[4,5]thieno[3,2-*c*]pyridine (5g):**

Yield: 27 mg (35%), yellowish green solid. M.p.: 150.8 – 152.1 ºC. 1H NMR (400 MHz, CDCl3) *δ* ppm 8.38 – 8.06 (m, 4H), 7.89 (d, *J* = 8.8 Hz, 1H), 7.54 – 7.40 (m, 5H), 7.30 (s, 1H), 7.22 – 7.14 (m, 3H), 4.88 (s, 2H); 13C NMR (100 MHz, CDCl3) *δ* ppm 154.2, 152.3, 150.0, 140.3, 139.1, 138.8, 134.3, 133.4, 129.7, 128.9, 128.8, 128.8, 127.1, 126.9, 126.8, 126.5, 125.2, 124.8, 122.9, 112.4, 43.3; IR (KBr, cm-1): *ν* = 3057, 2994, 2917, 1764, 1568, 1475, 1423, 1373, 1242, 1061, 759, 691; HRMS (ESI) calc. C24H16ClNS [M+H]+: 386.0765, found: 386.0762.

**1-(3,5-Difluorobenzyl)-3-phenylbenzo[4,5]thieno[3,2*-c*]pyridine (5h):**

Yield: 31 mg (40%), white solid. M.p.: 170.1 – 171.4 ºC. 1H NMR (400 MHz, CDCl3) *δ* ppm 8.19 (s, 1H), 8.12 (t, *J* = 7.6 Hz, 3H), 7.90 (d, *J* = 7.2 Hz, 1H), 7.56 – 7.38 (m, 5H), 6.81 (d, *J* = 6.6 Hz, 2H), 6.66 (t, *J* = 9.0 Hz, 1H), 4.86 (s, 2H); 13C NMR (100 MHz, CDCl3) *δ* ppm 164.3 (d, *J* = 12.9 Hz), 161.9 (d, *J* = 12.8 Hz), 153.5, 152.4, 150.2, 142.2 (t, *J* = 9.2 Hz), 139.1, 138.7, 133.3, 128.8, 128.0 (d, *J* = 210 Hz), 127.1, 125.3, 124.6, 123.0, 112.7, 111.6 (d, *J* = 25.2 Hz), 111.6 (d, *J* = 11.6 Hz), 101.9 (t, *J* = 25.4 Hz), 43.3; IR (KBr, cm-1): *ν* = 2990, 2913, 1764, 1580, 1452, 1377, 1243, 1110, 1057, 985, 846, 759, 694, 837; HRMS (ESI) calc. C24H15F2NS [M+H]+: 388.0966, found: 388.0962.

**3-Phenyl-1-(pyridin-2-ylmethyl)benzo[4,5]thieno[3,2-*c*]pyridine (5i):**

Yield: 51 mg (72%), white solid. M.p.: 133.6 – 134.9 ºC. 1H NMR (400 MHz, CDCl3) *δ* ppm 8.63 (d, *J* = 4.4 Hz, 1H), 8.45 – 8.35 (m, 1H), 8.23 – 8.04 (m, 3H), 7.92 – 7.79 (m, 1H), 7.57 – 7.34 (m, 6H), 7.17 – 7.06 (m, 2H), 5.09 (s, 2H); 13C NMR (101 MHz, CDCl3) *δ* ppm 158.8, 154.2, 152.3, 150.0, 149.3, 139.0, 138.9, 136.5, 133.6, 129.1, 128.9, 128.8, 127.1, 126.8, 125.4, 125.3, 123.1, 122.6, 121.4, 112.4, 47.0; IR (KBr, cm-1): *ν* = 3058, 2997, 1756, 1572, 1429, 1375, 1243, 1051, 853, 757, 692; HRMS (ESI) calc. C23H16N2S [M+H]+: 353.1107, found: 353.1101.

**1-Benzyl-3-(4-chlorophenyl)benzo[4,5]thieno[3,2-*c*]pyridine (5j):**

Yield: 41 mg (53%), white solid. M.p.: 166.9 – 167.8 ºC. 1H NMR (400 MHz, CDCl3) *δ* ppm 8.18 (d, *J* = 6.6 Hz, 1H), 8.12 – 8.00 (m, 3H), 7.89 – 7.76 (m, 1H), 7.42 (s, 4H), 7.32 – 7.22 (m, 4H), 7.20 (s, 1H), 4.87 (s, 2H); 13C NMR (100 MHz, CDCl3) *δ* ppm 155.3, 150.9, 150.0, 139.1, 138.1, 137.4, 134.9, 133.5, 129.1, 128.9, 128.6, 128.5, 128.3, 126.8, 126.3, 125.2, 125.0, 122.8, 112.0, 43.7; IR (KBr, cm-1): *ν* = 2992, 1763, 1566, 1485, 1242, 1065, 930, 826, 724, 630; HRMS (ESI) calc. C24H16ClNS [M+H]+: 386.0765, found: 386.0760.

**1-Benzyl-3-(4-(trifluoromethyl)phenyl)benzo[4,5]thieno[3,2-*c*]pyridine (5k):**

Yield: 25 mg (30%), yellow solid. M.p.: 139.6 – 141.2 ºC.1H NMR (400 MHz, CDCl3) *δ* ppm 8.24 (d, *J* = 8.2 Hz, 3H), 8.20 (s, 1H), 7.92 – 7.87 (m, 1H), 7.73 (d, *J* = 8.2 Hz, 2H), 7.52 – 7.40 (m, 2H), 7.33 – 7.27 (m, 4H), 7.25 – 7.18 (m, 1H), 4.91 (s, 2H); 13C NMR (101 MHz, CDCl3) *δ* ppm 155.5, 150.5, 145.0, 142.3, 139.2, 138.0, 133.4, 130.6 (q, *J* = 32.3 Hz), 129.6, 128.7, 128.6, 127.3, 127.0, 126.4, 125.7 (q, *J* = 3.8 Hz), 125.3, 125.2, 122.9, 112.7, 43.8; IR (KBr, cm-1): 2985, 2345, 1763, 1581, 1322, 1243, 1059, 841, 749, 684; HRMS (ESI) calc. C25H16F3NS [M+H]+: 420.1028, found: 420.1027.

**1-Benzyl-3-(4-(methoxymethoxy)phenyl)benzo[4,5]thieno[3,2-*c*]pyridine (5l):**

Yield: 58 mg (71%), white solid. M.p.: 141.9 – 143.0 ºC. 1H NMR (400 MHz, CDCl3) *δ* ppm 8.20 (dd, *J* = 7.1, 1.9 Hz, 1H), 8.15 – 8.05 (m, 3H), 7.85 (dd, *J* = 6.9, 2.0 Hz, 1H), 7.49 – 7.37 (m, 2H), 7.34 – 7.27 (m, 4H), 7.24 – 7.19 (m, 1H), 7.19 – 7.14 (m, 2H), 5.26 (s, 2H), 4.89 (s, 2H), 3.53 (s, 3H); 13C NMR (101 MHz, CDCl3) *δ* ppm 158.0, 155.0, 151.8, 149.9, 138.8, 138.2, 133.6, 132.7, 128.6, 128.5, 128.4, 128.3, 126.5, 126.2, 125.1, 124.9, 122.7, 116.3, 111.4, 94.3, 56.0, 43.7; IR (KBr, cm-1): *ν* = 2920, 2852, 1764, 1569, 1503, 1421, 1237, 1150, 1070, 992, 831, 729, 634; HRMS (ESI) calc. C26H21NO2S [M+H]+: 412.1366, found: 412.1360.

**1-Benzyl-3-(3-(methoxymethoxy)phenyl)benzo[4,5]thieno[3,2-*c*]pyridine (5m):**

Yield: 54 mg (66%), yellow solid. M.p.: 92.8 – 93.6 ºC. 1H NMR (400 MHz, CDCl3) *δ* ppm 8.23 (dd, *J* = 7.1, 1.8 Hz, 1H), 8.15 (s, 1H), 7.87 (dd, *J* = 9.2, 2.1 Hz, 2H), 7.79 (d, *J* = 7.8 Hz, 1H), 7.49 – 7.38 (m, 3H), 7.34 – 7.27 (m, 4H), 7.22 (tt, *J* = 5.4, 2.8 Hz, 1H), 7.13 (dd, *J* = 7.9, 2.1 Hz, 1H), 5.29 (s, 2H), 4.91 (s, 2H), 3.56 (s, 3H); 13C NMR (101 MHz, CDCl3) *δ* ppm 157.6, 155.1, 151.7, 149.8, 140.5, 139.0, 138.2, 133.5, 129.7, 129.0, 128. 7, 128.5, 126.6, 126.2, 125.1, 125.0, 122.7, 120.6, 116.7, 114.9, 112.3, 94.4, 56.0, 43.7; IR (KBr, cm-1): *ν* = 2934, 1573, 1487, 1443, 1220, 1152, 1079, 1013, 928, 861, 784, 734, 700; HRMS (ESI) calc. C26H21NO2S [M+H]+: 412.1366, found: 412.1363.

**3-(4-(1,3-Dioxolan-2-yl)phenyl)-1-benzylbenzo[4,5]thieno[3,2-*c*]pyridine (5n):**

Yield: 51 mg (60%), white solid. M.p.: 178.2 – 179.8 ºC. 1H NMR (400 MHz, CDCl3) *δ* ppm 8.24 – 8.14 (m, 4H), 7.89 – 7.83 (m, 1H), 7.62 (d, *J* = 8.2 Hz, 2H), 7.48 – 7.38 (m, 2H), 7.32 – 7.25 (m, 4H), 7.23 – 7.18 (m, 1H), 5.91 (s, 1H), 4.91 (s, 2H), 4.20 – 4.01 (m, 4H); 13C NMR (101 MHz, CDCl3) *δ* ppm 155.1, 151.6, 149.9, 139.7, 139.0, 138.5, 138.1, 133.5, 129.0, 128.6, 128.5, 127.1, 126.8, 126.7, 126. 2, 125.1, 125.0, 122.7, 112.3, 103.5, 65.2, 43.6; IR (KBr, cm-1): *ν* = 2922, 2855, 2227, 1713, 1567, 1447, 1243, 1080, 1020, 949, 830, 736, 703; HRMS (ESI) calc. C27H21NO2S [M+H]+: 424.1366, found: 424.1359.

**1-Benzyl-3-(3,5-dimethylphenyl)benzo[4,5]thieno[3,2-*c*]pyridine (5o):**

Yield: 55 mg (72%), yellow solid. M.p.: 152.3 – 153.7 ºC. 1H NMR (400 MHz, CDCl3) *δ* 8.26 – 8.19 (m, 1H), 8.17 (s, 1H), 7.90 – 7.84 (m, 1H), 7.81 (s, 2H), 7.48 – 7.35 (m, 2H), 7.33 (d, *J* = 4.2 Hz, 4H), 7.24 (dd, *J* = 8.9, 4.6 Hz, 1H), 7.11 (s, 1H), 4.95 (s, 2H), 2.46 (s, 6H); 13C NMR (101 MHz, CDCl3) *δ* 154.9, 152.5, 149.8, 138.9, 138.8, 138.2, 138.2, 133.6, 130.5, 128.8, 128.6, 128.5, 126.5, 126.2, 125.0, 125.0, 124.9, 122.7, 112.3, 43.7, 21.4; IR (KBr, cm-1): *ν* = 3056, 2919, 1761, 1705, 1569, 1438, 1241, 1076, 913, 851, 707; HRMS (ESI) calc. C26H21NS [M+H]+: 380.1467, found: 380.1463.

**1-Benzyl-3-(naphthalen-2-yl)benzo[4,5]thieno[3,2-*c*]pyridine (5p):**

Yield: 53 mg (66%), white solid. M.p.: 185.7 – 187.3 ºC. 1H NMR (400 MHz, CDCl3) *δ* ppm 8.67 – 8.59 (m, 1H), 8.31 (s, 1H), 8.28 (dd, *J* = 8.6, 1.9 Hz, 1H), 8.25 – 8.19 (m, 1H), 7.99 – 7.92 (m, 2H), 7.92 – 7.84 (m, 2H), 7.54 – 7.48 (m, 2H), 7.47 – 7.40 (m, 2H), 7.36 – 7.27 (m, 4H), 7.25 – 7.19 (m, 1H), 4.95 (s, 2H); 13C NMR (100 MHz, CDCl3) *δ* ppm 155.3, 152.1, 150.0, 139.1, 138.3, 136.3, 133.7, 133.7, 133.6, 129.0, 128.7, 128.7, 128.6, 128.4, 127.7, 126.7, 126.5, 126.4, 126.3, 126.2, 125.2, 125.1, 124.8, 122.8, 112.5, 43.8; IR (KBr, cm-1): *ν* = 2994, 2917, 1764, 1571, 1378, 1243, 1057, 739, 631; HRMS (ESI) calc. C28H19NS [M+H]+: 402.1311, found: 402.1307.

**1-Benzyl-3-(pyridin-2-yl)benzo[4,5]thieno[3,2-*c*]pyridine (5q):**

Yield: 25 mg (70%), white solid. M.p.: 152.7 – 154.0 ºC. 1H NMR (400 MHz, CDCl3) *δ* ppm 8.85 (s, 1H), 8.65 (d, *J* = 4.0 Hz, 1H), 8.47 (d, *J* = 8.0 Hz, 1H), 8.28 – 8.12 (m, 1H), 7.84 – 7.78 (m, 1H), 7.76 – 7.67 (m, 1H), 7.41 – 7.30 (m, 2H), 7.28 – 7.11 (m, 6H), 4.85 (s, 2H); 13C NMR (101 MHz, CDCl3) *δ* ppm 155.8, 154.7, 150.8, 149.9, 149.0, 139.5, 138.1, 136.8, 133.5, 130.0, 128.6, 128.5, 126.7, 126.2, 125.0, 125.0, 123.5, 122.7, 121.6, 113.1, 43.7; IR (KBr, cm-1): *ν* = 2990, 1764, 1583, 1372, 1243, 1057, 926, 489; HRMS (ESI) calc. C23H16N2S [M+H]+: 353.1107, found: 353.1103.

**3-(Pyridin-2-yl)-1-(pyridin-2-ylmethyl)benzo[4,5]thieno[3,2-c]pyridine (5r):**

Yield: 45 mg (64%), white solid. M.p.: 154.5 – 156.0 ºC. 1H NMR (400 MHz, CDCl3) *δ* ppm 8.89 (s, 1H), 8.70 (d, *J* = 4.0 Hz, 1H), 8.65 (d, *J* = 4.2 Hz, 1H), 8.49 (d, *J* = 7.9 Hz, 1H), 8.44 – 8.30 (m, 1H), 7.90 – 7.83 (m, 1H), 7.83 – 7.77 (m, 1H), 7.58 – 7.38 (m, 3H), 7.35 – 7.24 (m, 1H), 7.16 – 7.08 (m, 2H), 5.10 (s, 2H); 13C NMR (101 MHz, CDCl3) *δ* ppm 158.7, 155.9, 153.7, 151.0, 150.1, 149.1, 149.1, 139.5, 136.9, 136.6, 133.5, 130.3, 127.0, 125.4, 125.2, 123.6, 123.2, 122.7, 121.6, 121.5, 113.4, 46.8; IR (KBr, cm-1): *ν* = 2928, 1763, 1576, 1468, 1242, 1060, 749, 629; HRMS (ESI) calc. C22H15N3S [M+H]+: 354.1059, found: 354.1053.

**3-(5-(1-Benzylbenzo[4,5]thieno[3,2-*c*]pyridin-3-yl)-1-(4-fluorophenyl)-1,3-dihydroisobenzofuran-1-yl)-*N*,*N*-dimethylpropan-1-amine (5s):**

Yield: 77 mg (67%), yellowish green solid. M.p.: 155.8 – 157.3 ºC. 1H NMR (400 MHz, CDCl3) *δ* ppm 8.16 (d, *J* = 7.8 Hz, 1H), 8.09 (s, 1H), 8.03 – 7.95 (m, 2H), 7.83 (d, *J* = 7.6 Hz, 1H), 7.49 (dd, *J* = 8.7, 5.5 Hz, 2H), 7.45 – 7.31 (m, 3H), 7.24 (d, *J* = 4.9 Hz, 4H), 7.21 – 7.11 (m, 1H), 6.99 (t, *J* = 8.7 Hz, 2H), 5.33 – 5.13 (m, 2H), 4.86 (s, 2H), 2.26 (t, *J* = 7.3 Hz, 2H), 2.20 (ddd, *J* = 10.2, 6.5, 3.9 Hz, 2H), 2.15 (s, 6H), 1.64 – 1.32 (m, 2H); 13C NMR (100 MHz, CDCl3) *δ* ppm 161.8 (d, *J* = 245.2 Hz), 155.2, 151.8, 149.9, 144.8, 141.0 (d, *J* = 3.0 Hz), 139.9, 138.9, 138.9, 138.1, 133.5, 128.5, 128.5, 126.9, 126.8, 126.7, 126.6, 126.2, 125.2, 125.0, 122.7, 122.1, 120.0, 114.9 (d, *J* = 21.2 Hz), 112.2, 90.8, 71.9, 59.6, 45.3, 43.7, 39.2, 22.2; IR (KBr, cm-1): *ν* = 3062, 2947, 2769, 1755, 1571, 1505, 1451, 1372, 1234, 1158, 1033, 830, 739; HRMS (ESI) calc. C37H33FN2OS [M+H]+: 573.2370, found: 573.2365.

**2-Benzyl-6-phenylpyridine (7a):**

Yield: 29 mg (60%), yellow oil. 1H NMR (400 MHz, CDCl3) *δ* ppm 8.12 – 8.01 (m, 2H), 7.64 (t, *J* = 7.7 Hz, 1H), 7.56 (d, *J* = 7.3 Hz, 1H), 7.53 – 7.47 (m, 2H), 7.46 – 7.41 (m, 1H), 7.40 – 7.32 (m, 4H), 7.30 – 7.22 (m, 1H), 7.04 (d, *J* = 7.0 Hz, 1H), 4.28 (s, 2H); 13C NMR (100 MHz, CDCl3) *δ* ppm 160.8, 156.8, 139.6, 139.5, 137.1, 129.2, 128.8, 128.6, 128.5, 127.0, 126.3, 121.3, 118.0, 44.8; IR (KBr, cm-1): *ν* = 3055, 2920, 1574, 1445, 1242, 1025, 754, 698; HRMS (ESI) calc. C18H15N [M+H]+: 246.1277, found: 246.1274.

**2-Benzyl-6-(4-(*tert*-butyl)phenyl)pyridine (7b):**

Yield: 35 mg (58%), yellow oil. 1H NMR (400 MHz, CDCl3) *δ* ppm 7.94 (d, *J* = 8.4 Hz, 2H), 7.56 (t, *J* = 7.7 Hz, 1H), 7.51 – 7.46 (m, 3H), 7.37 – 7.25 (m, 4H), 7.20 (t, *J* = 7.0 Hz, 1H), 6.96 (d, *J* = 7.5 Hz, 1H), 4.21 (s, 2H), 1.35 (s, 9H); 13C NMR (100 MHz, CDCl3) *δ* ppm 160.7, 156.8, 151.9, 139.7, 137.0, 136.8, 129.2, 128.4, 126.7, 126.2, 125.6, 121.0, 117.7, 44.9, 34.6, 31.3; IR (KBr, cm-1): *ν* = 2956, 1747, 1579, 1451, 1374, 1248, 841, 791, 700; HRMS (ESI) calc. C22H23N [M+H]+: 302.1903, found: 302.1901.

**2-Benzyl-6-(4-methoxyphenyl)pyridine (7c):**

Yield: 19 mg (35%), yellow oil. 1H NMR (400 MHz, CDCl3) *δ* ppm 8.01 – 7.95 (m, 2H), 7.59 (t, *J* = 7.7 Hz, 1H), 7.49 (d, *J* = 7.6 Hz, 1H), 7.39 – 7.28 (m, 4H), 7.26 – 7.20 (m, 1H), 7.02 – 6.98 (m, 2H), 6.96 (d, *J* = 7.6 Hz, 1H), 4.23 (s, 2H), 3.87 (s, 3H); 13C NMR (100 MHz, CDCl3) *δ* ppm 160.7, 160.4, 156.5, 139.7, 137.2, 132.2, 129.3, 128.5, 128.3, 126.3, 120.7, 117.3, 114.1, 55.4, 44.8; IR (KBr, cm-1): *ν* = 1761, 1707, 1566, 1507, 1439, 1242, 1171, 1021, 784, 701, 625; HRMS (ESI) calc. C19H17NO [M+H]+: 276.1383, found: 276.1379.

**2-([1,1'-Biphenyl]-4-yl)-6-benzylpyridine (7d):**

Yield: 33 mg (52%), white solid. M.p.: 102.9 – 104.3 ºC. 1H NMR (400 MHz, CDCl3) *δ* ppm 8.15 (dd, *J* = 8.3, 2.6 Hz, 2H), 7.75 (dd, *J* = 8.4, 2.1 Hz, 2H), 7.72 – 7.66 (m, 2H), 7.66 – 7.58 (m, 2H), 7.53 – 7.46 (m, 2H), 7.42 – 7.33 (m, 5H), 7.32 – 7.24 (m, 1H), 7.05 (d, *J* = 7.3 Hz, 1H), 4.30 (s, 2H); 13C NMR (100 MHz, CDCl3) *δ* ppm 160.9, 156.4, 141.6, 140.7, 139.6, 138.4, 137.2, 129.3, 128.8, 128.5, 127.5, 127.4, 127.1, 126.3, 121.4, 117.9, 44.8; IR (KBr, cm-1): *ν* = 2956, 2345, 1757, 1592, 1493, 1241, 1054, 690; HRMS (ESI) calc. C24H19N [M+H]+: 322.1590, found: 322.1585.

**2-Benzyl-6-(*m*-tolyl)pyridine (7e):**

Yield: 26 mg (50%), yellow oil. 1H NMR (400 MHz, CDCl3) *δ* ppm 7.86 (s, 1H), 7.80 (d, *J* = 7.7 Hz, 1H), 7.62 (t, *J* = 7.7 Hz, 1H), 7.54 (d, *J* = 7.4 Hz, 1H), 7.42 – 7.30 (m, 5H), 7.28 – 7.21 (m, 2H), 7.01 (d, *J* = 7.6 Hz, 1H), 4.26 (s, 2H), 2.46 (s, 3H); 13C NMR (100 MHz, CDCl3) *δ* ppm 160.8, 157.0, 139.7, 139.6, 138.3, 137.1, 129.6, 129.3, 128.6, 128.5, 127.7, 126.3, 124.1, 121.2, 118.1, 44.9, 21.6; IR (KBr, cm-1): *ν* = 3062, 2997, 1763, 1700, 1575, 1441, 1242, 1059, 768, 699; HRMS (ESI) calc. C19H17N [M+H]+: 260.1434, found: 260.1431.

**2-Benzyl-6-(3,5-dimethylphenyl)pyridine (7f):**

Yield: 25 mg (45%), yellow oil. 1H NMR (400 MHz, CDCl3) *δ* ppm 7.68 – 7.58 (m, 3H), 7.54 (d, *J* = 7.7 Hz, 1H), 7.35 (d, *J* = 6.2 Hz, 4H), 7.27 (s, 1H), 7.08 (s, 1H), 7.00 (d, *J* = 7.5 Hz, 1H), 4.28 (s, 2H), 2.43 (s, 6H); 13C NMR (100 MHz, CDCl3) *δ* ppm 160.7, 157.2, 139.7, 139.6, 138.1, 137.0, 130.4, 129.2, 128.5, 126.3, 124.9, 121.1, 118.1, 44.9, 21.4; IR (KBr, cm-1): *ν* = 2927, 2346, 1763, 1579, 1452, 1243, 1057, 685; HRMS (ESI) calc. C20H19N [M+H]+: 274.1590, found: 274.1586.

**(*Z*)-1,2-Diphenyl-1,2-bis(4-((3-phenylbenzo[4,5]thieno[3,2-*c*]pyridin-1-yl)methyl)phenyl)ethene (8):**

white solid. M.p.: 237.5 – 238.9 ºC. 1H NMR (400 MHz, DMSO-*d*6) *δ* ppm 8.65 (s, 2H), 8.18 (d, *J* = 7.4 Hz, 4H), 8.09 (d,  *J* = 7.9 Hz, 4H), 7.53 – 7.46 (m, 6H), 7.46 – 7.37 (m, 4H), 7.07 (d, *J* = 6.0 Hz, 6H), 6.95 – 6.68 (m, 12H), 4.71 (s, 4H); 13C NMR (100 MHz, DMSO-*d*6) *δ* ppm 155.2, 151.4, 150.0, 143.7, 141.5, 140.6, 139.1, 138.7, 136.7, 133.3, 131.2, 131.1, 129.5, 129.2, 128.7, 128.7, 128.5, 128.2, 127.5, 127.2, 126.9, 125.7, 125.5, 123.7, 112.8, 43.3; IR (KBr, cm-1): *ν* = 2925, 2858, 1756, 1458, 1376, 1244, 1052, 933, 850, 754, 609; HRMS (ESI) calc. C62H42N2S2 [M+H]+: 879.2862, found: 879.2847.

**2-(4-(1-Benzylbenzo[4,5]thieno[3,2-c]pyridin-3-yl)benzylidene)malononitrile (9):**

yellow solid. M.p.: 255.7 – 257.1 ºC. 1H NMR (400 MHz, DMSO-*d*6) *δ* ppm 8.80 (s, 1H), 8.53 (s, 1H), 8.40 (d, *J* = 8.2 Hz, 2H), 8.33 (d, *J* = 7.8 Hz, 1H), 8.14 (d, *J* = 7.6 Hz, 1H), 8.04 (d, *J* = 8.2 Hz, 2H), 7.59 – 7.49 (m, 2H), 7.27 (s, 4H), 7.23 – 7.16 (m, 1H), 4.87 (s, 2H); 13C NMR (100 MHz, DMSO-*d*6) *δ* ppm 161.0, 155.8, 150.1, 149.4, 143.8, 139.5, 138.5, 133.1, 132.0, 131.5, 129.5, 129.1, 129.0, 128.0, 127.8, 126.7, 126.1, 125.7, 123.9, 114.8, 114.2, 113.9, 81.7, 43.4; IR (KBr, cm-1): *ν* = 2921, 2341, 1758, 1639, 1380, 1244, 1047, 832, 757, 673; HRMS (ESI) calc. C28H17N3S [M+H]+: 428.1216, found: 428.1217.

**X-ray Crystallographic Analysis for Product 3i**

**Table S4.** Crystal data and structure refinement for **3i**

| Empirical formula | C26H25N |
| --- | --- |
| Formula weight | 351.47 |
| Temperature | 100(10) K |
| Wavelength | 0.71073 Å |
| Crystal system | triclinic |
| Space group | P-1 |
| Unit cell dimensions | *a* = 9.5286(8) Å, *α* = 96.109(6) o |
| *b* = 10.7411(8) Å, *β* = 113.718(7) o |
| *c* = 11.4614(8) Å, *γ* = 109.108(7) o |
| Density (calculated) | 1.196 |
| Absorption coefficient | 0.069 mm1 |
| *F*(000) | 376.0 |
| Crystal size | 0.13 × 0.12 × 0.11 |
| Theta range for data collection | 4.82 to 49.992 |
| Index ranges | -11 ≤ h ≤ 11, -12 ≤ k ≤ 12, -13 ≤ l ≤ 13 |
| Reflections collected | 7248 |
| Independent reflections | 3427 [*R*int = 0.0291, *R*sigma = 0.0479] |
| Completeness to theta | 99.9% |
| Refinement method | Full-matrix least-squares on *F*2 |
| Data/restraints/parameters | 3427/0/280 |
| Goodness-of-fit on *F*2 | 1.050 |
| Final *R* indices [*I > 2sigma(I)*] | *R*1 = 0.0502, *wR*2 = 0.1281 |
| Final *R* indices (all data) | *R*1 = 0.0677, *wR*2 = 0.1440 |

**NMR Spectra for All the Compounds**

**1H NMR (500 MHz, CDCl3) spectrum of compound 3a**


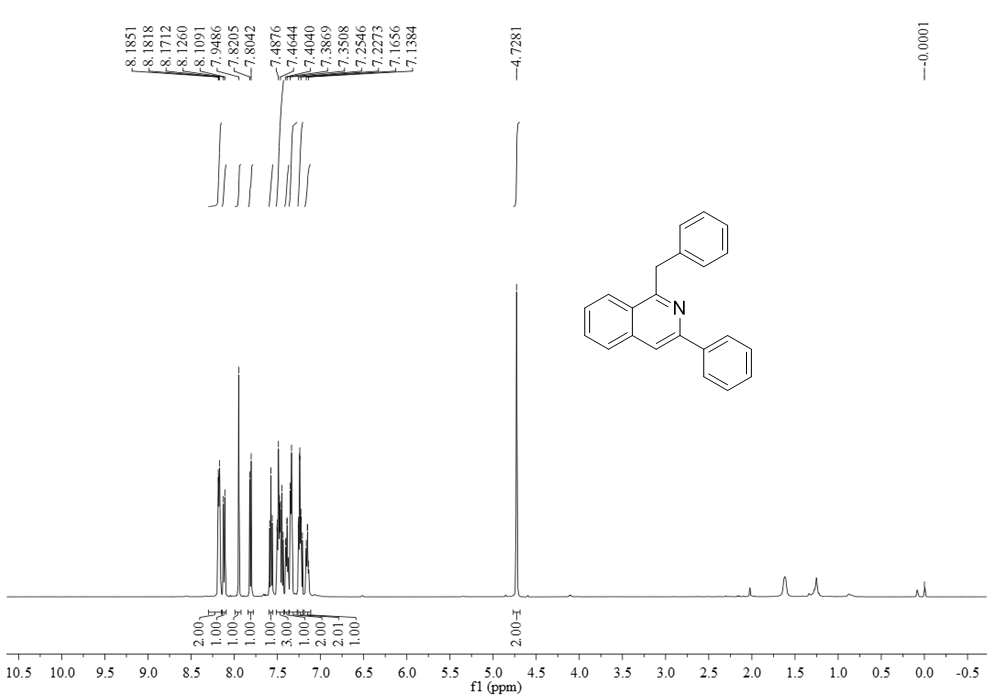


**13C NMR (125 MHz, CDCl3) spectrum of compound 3a**


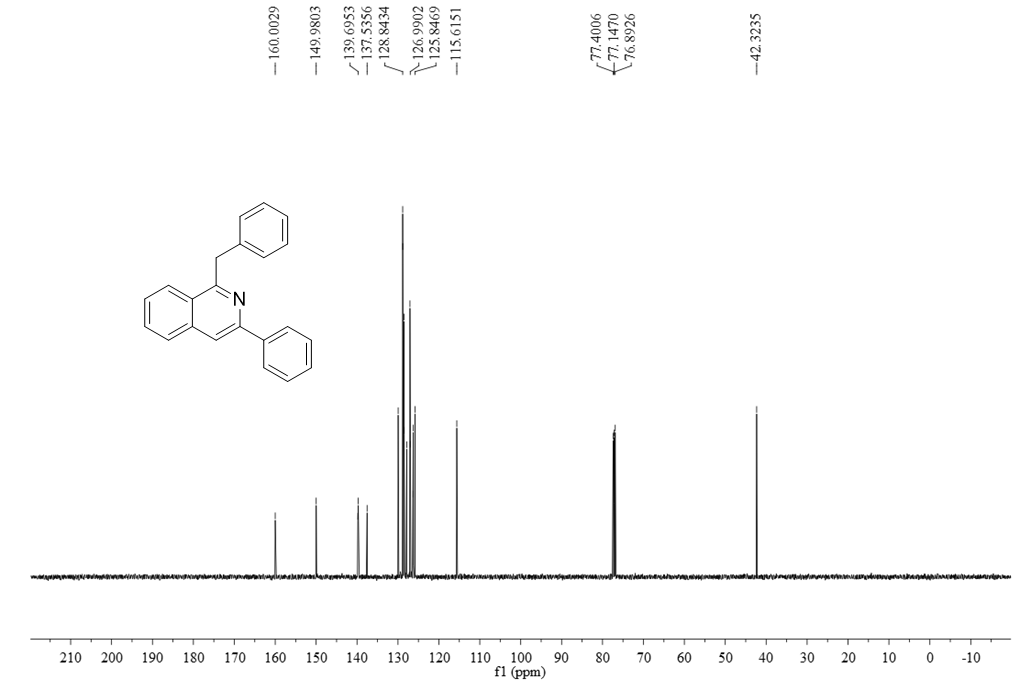


**1H NMR (400 MHz, CDCl3) spectrum of compound 3b**


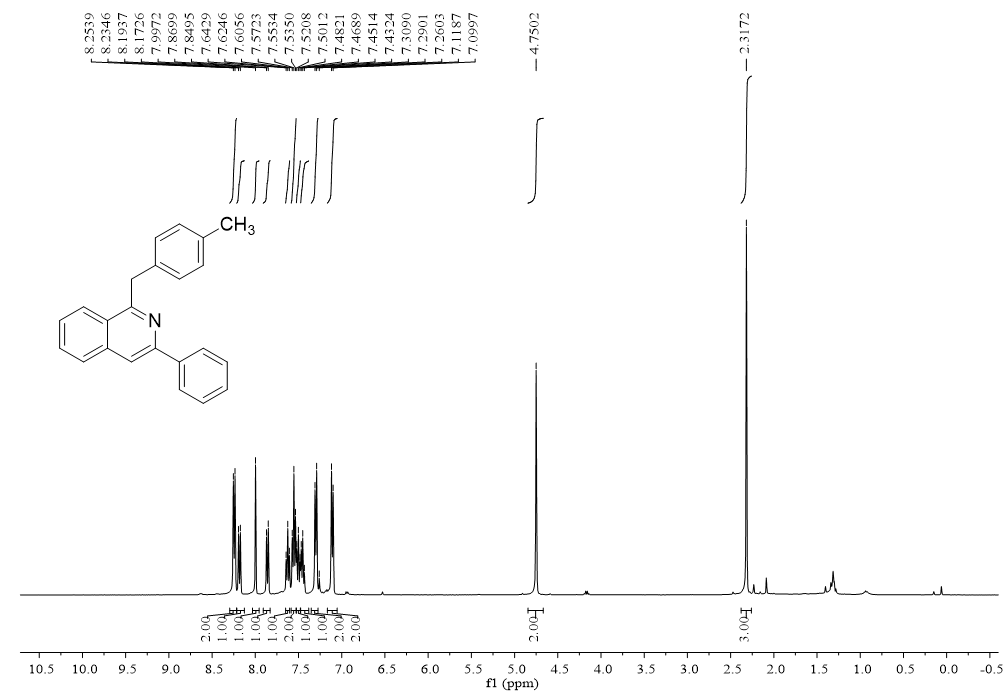


**13C NMR (100 MHz, CDCl3) spectrum of compound 3b**


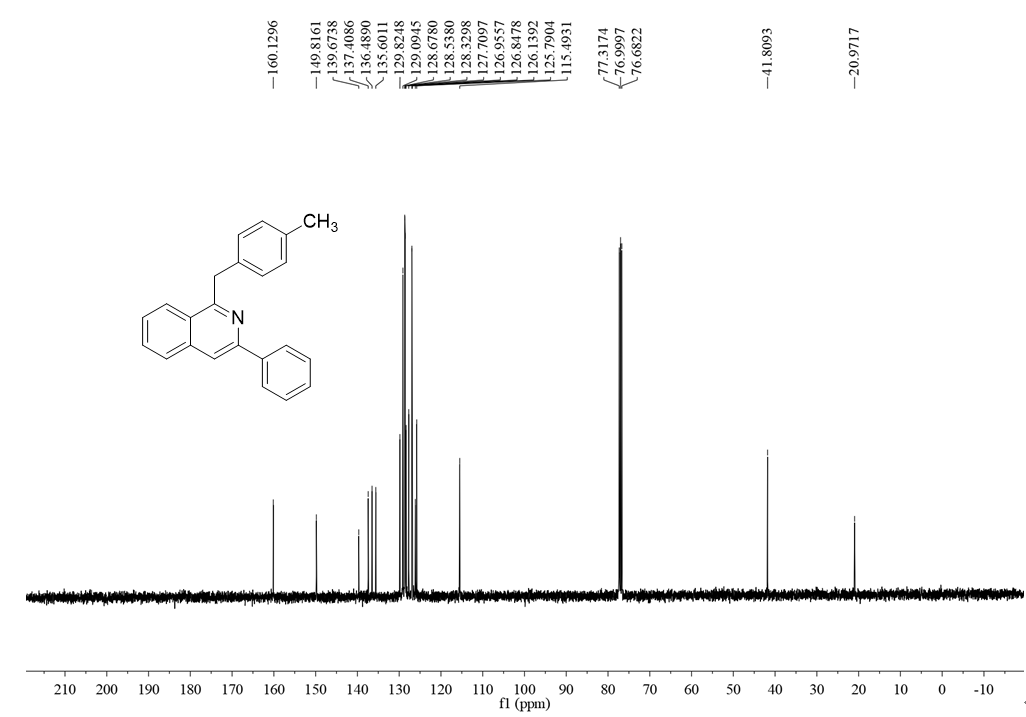


**1H NMR (400 MHz, CDCl3) spectrum of compound 3c**


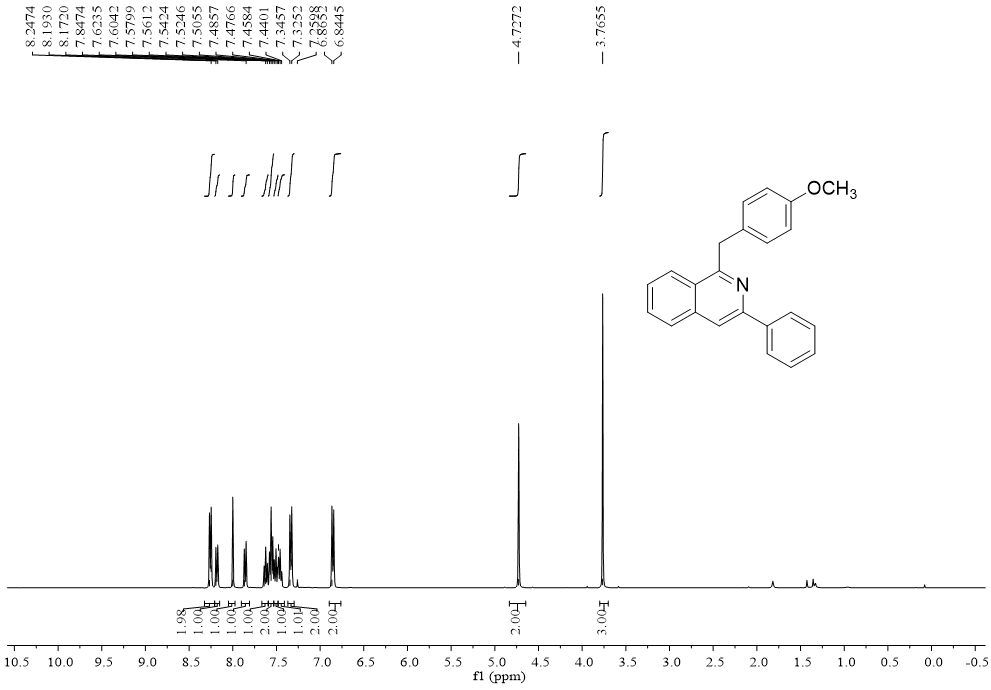


**13C NMR (100 MHz, CDCl3) spectrum of compound 3c**


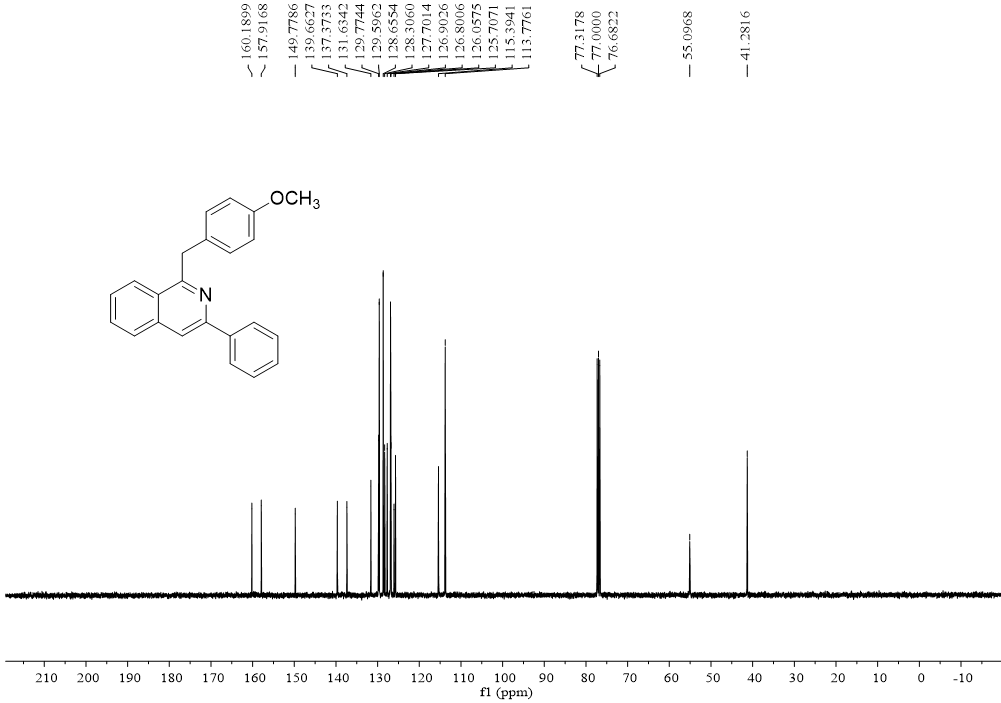


**1H NMR (400 MHz, CDCl3) spectrum of compound 3d**


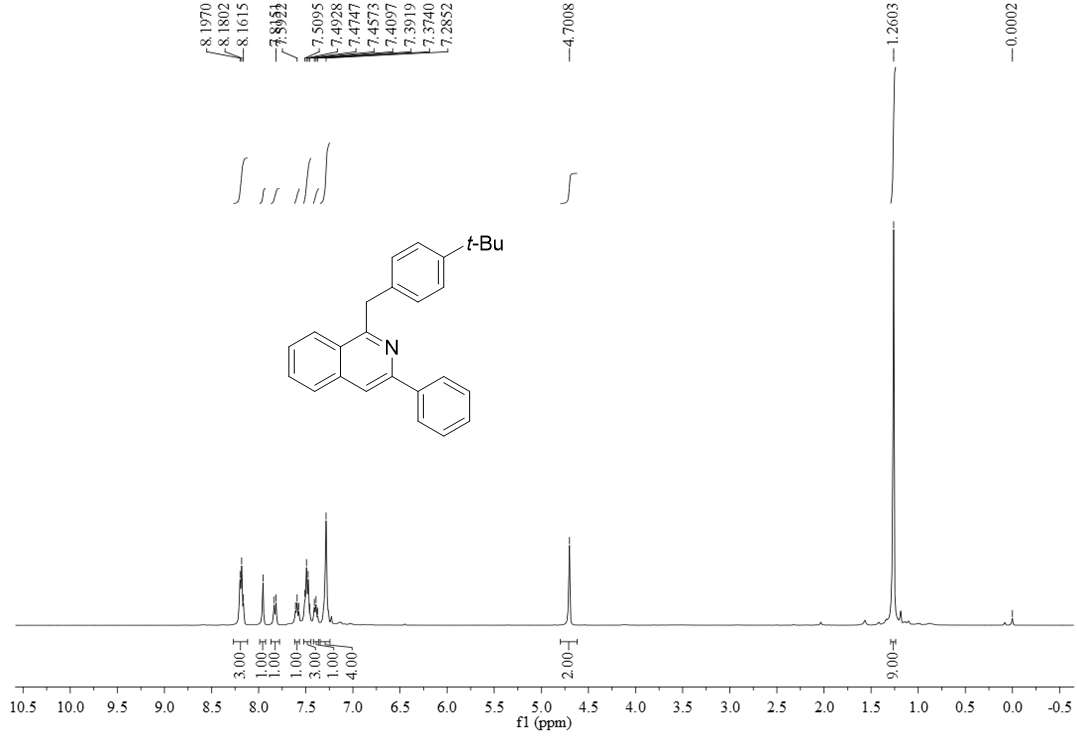


**13C NMR (100 MHz, CDCl3) spectrum of compound 3d**


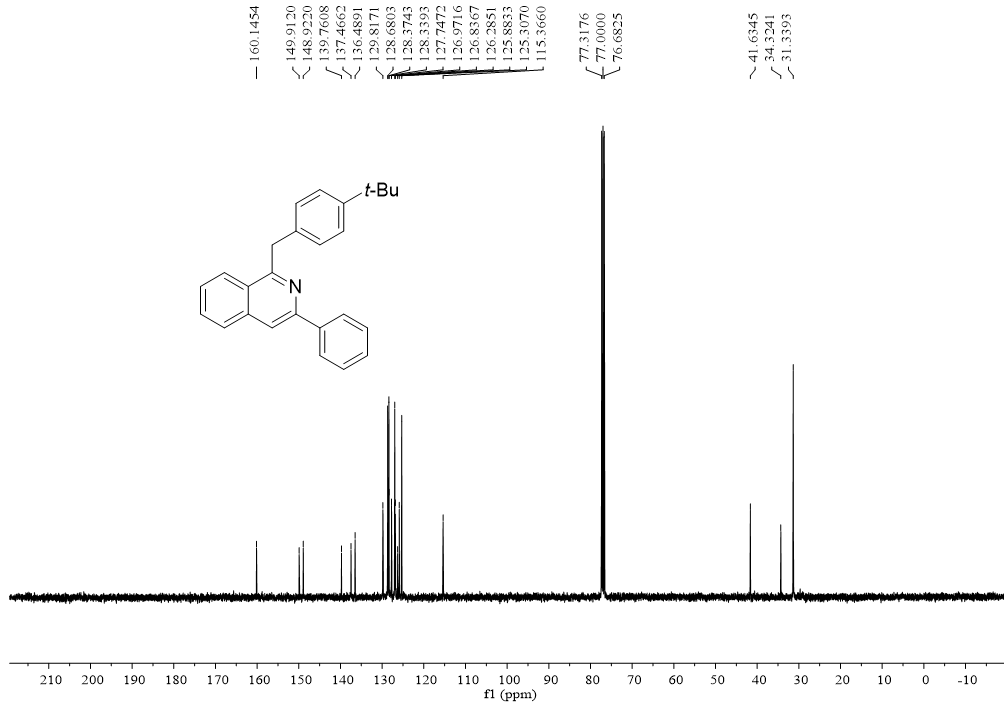


**1H NMR (500 MHz, CDCl3) spectrum of compound 3e**


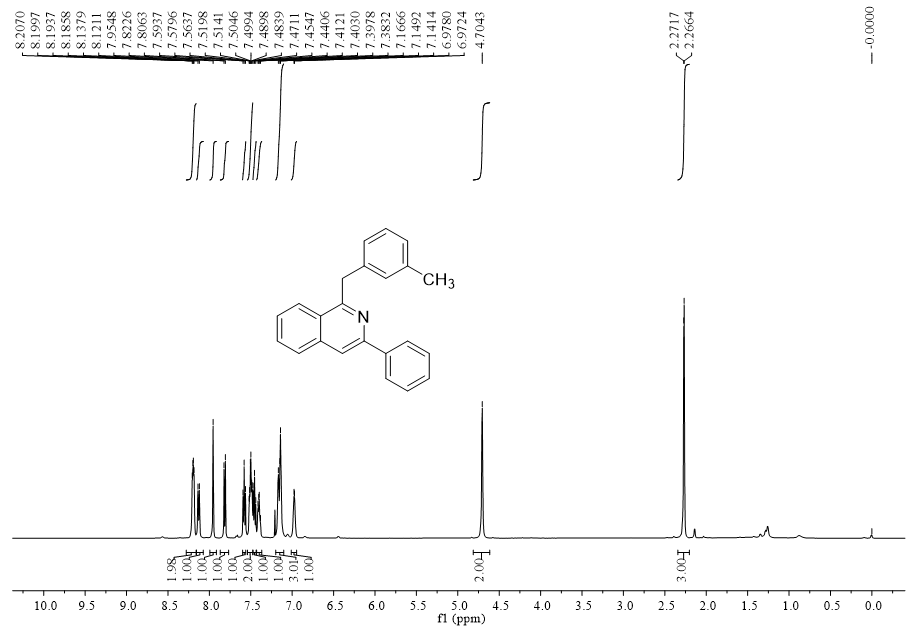


**13C NMR (125 MHz, CDCl3) spectrum of compound 3e**


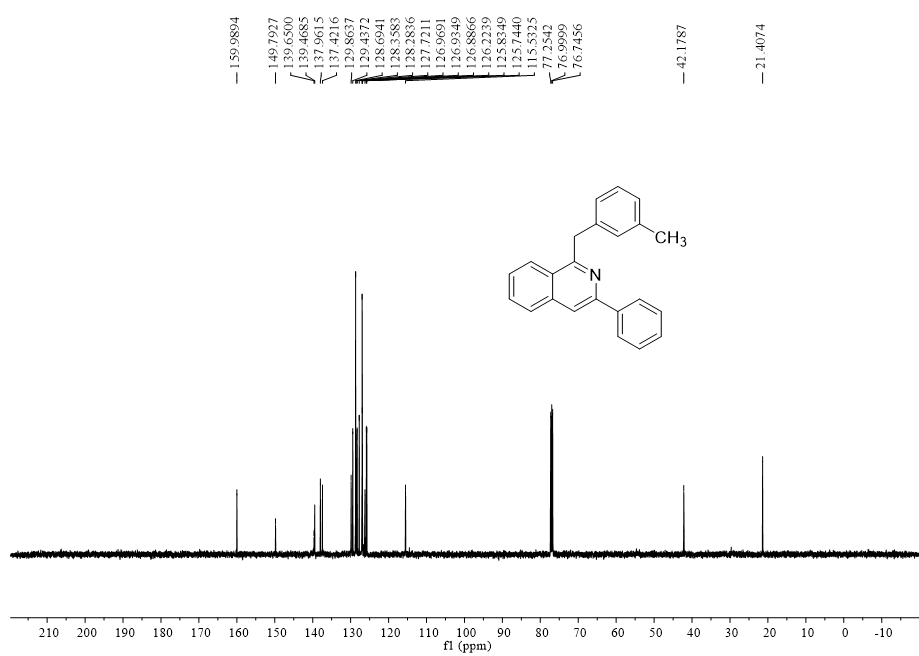


**1H NMR (500 MHz, CDCl3) spectrum of compound 3f**


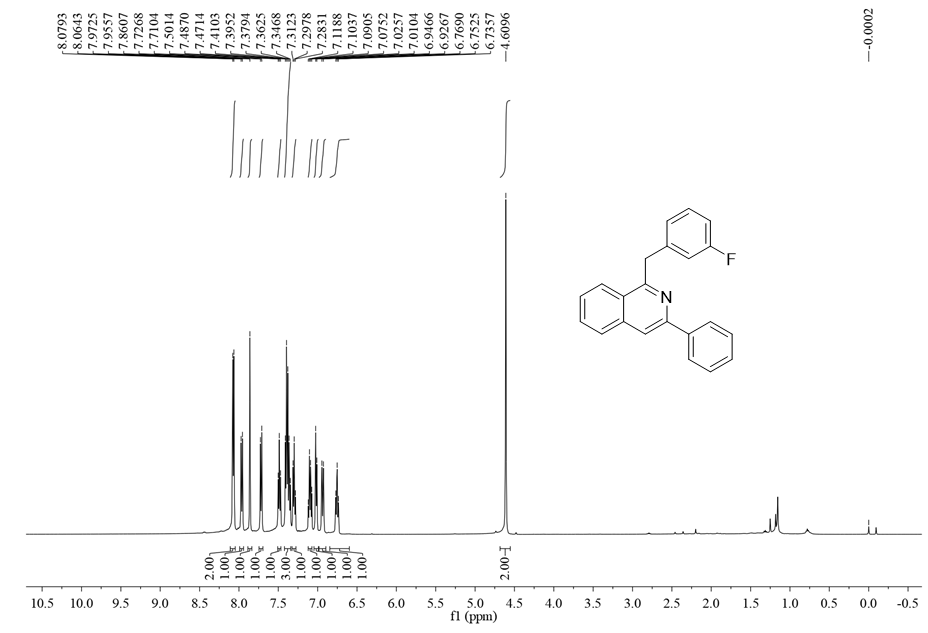


**13C NMR (125 MHz, CDCl3) spectrum of compound 3f**


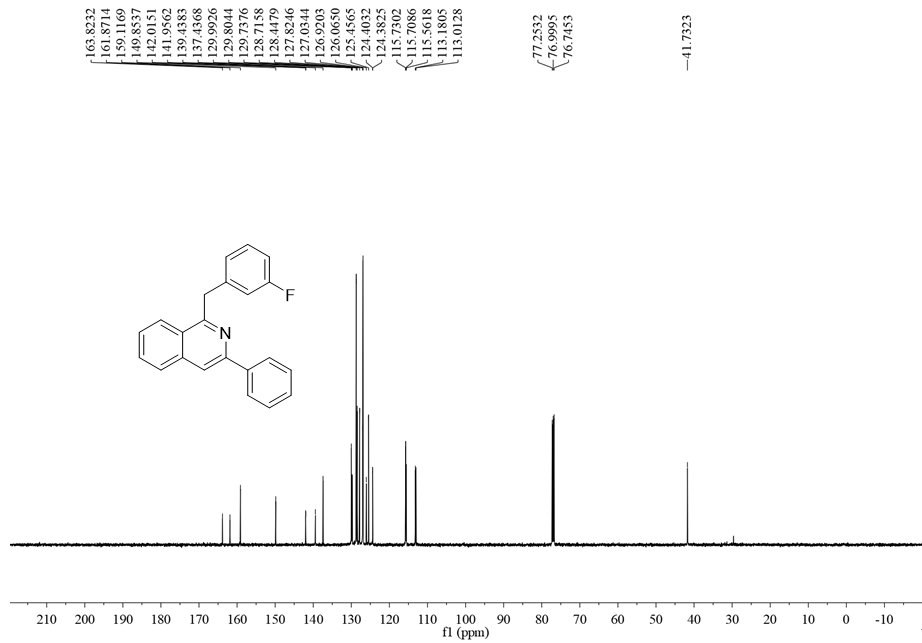


**1H NMR (500 MHz, CDCl3) spectrum of compound 3g**


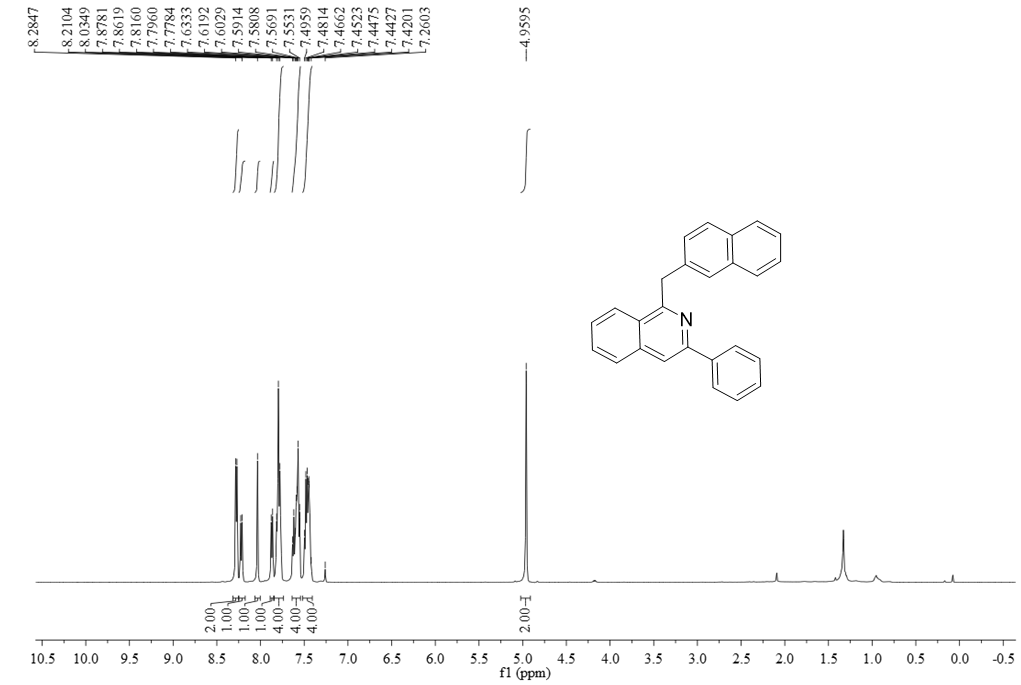


**13C NMR (125 MHz, CDCl3) spectrum of compound 3g**


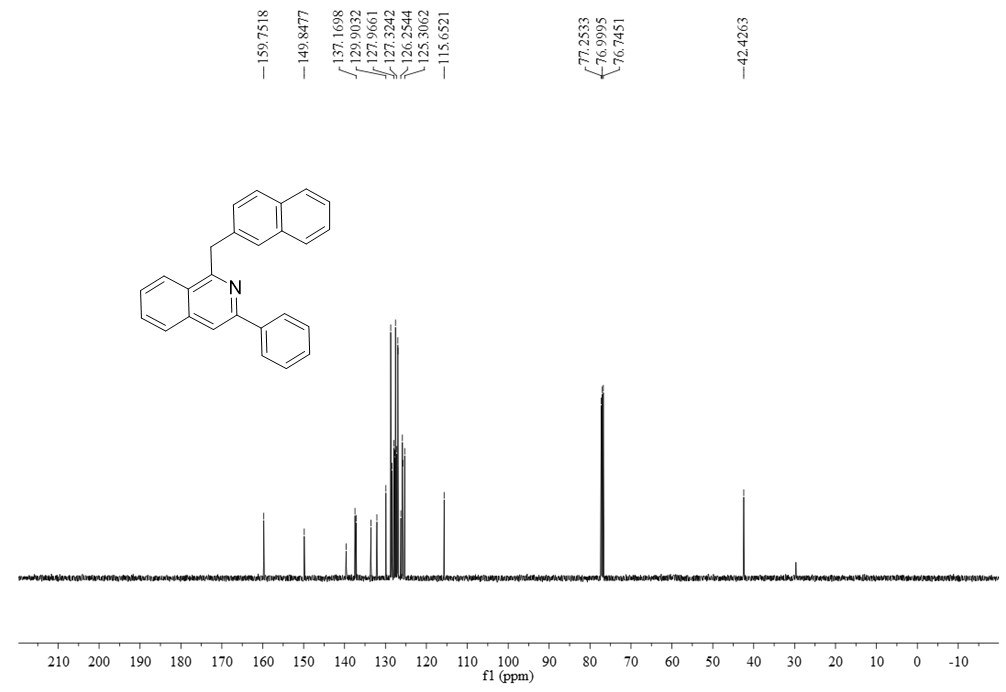


**1H NMR (400 MHz, CDCl3) spectrum of compound 3h**


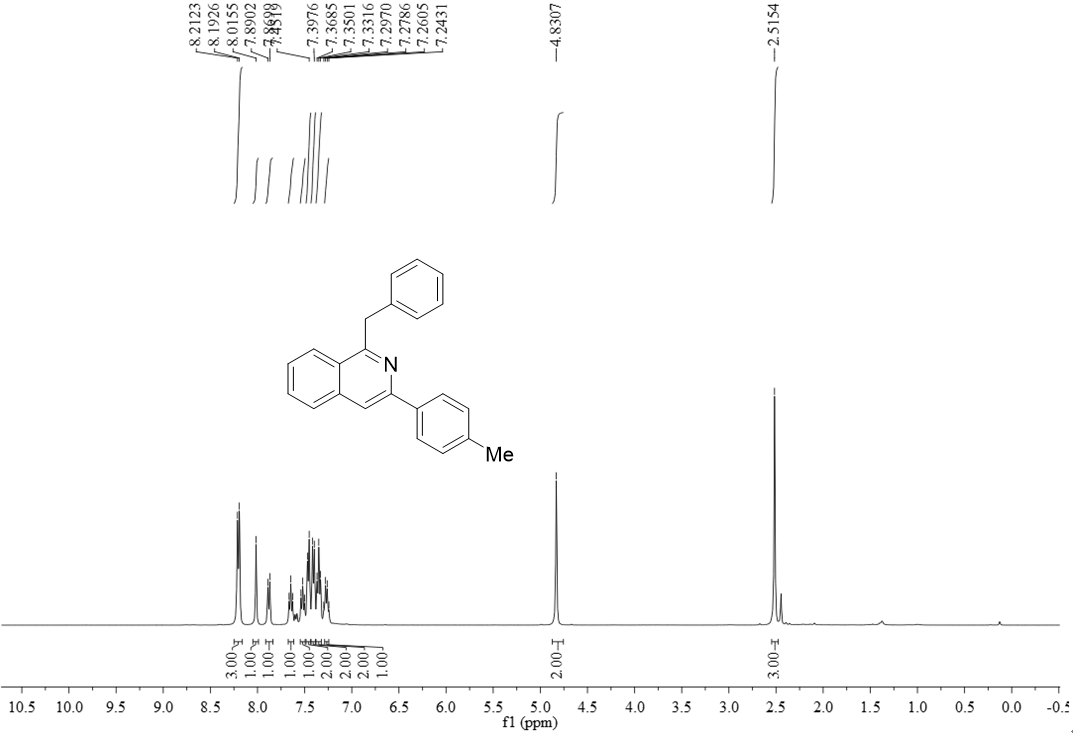


**13C NMR (100 MHz, CDCl3) spectrum of compound 3h**


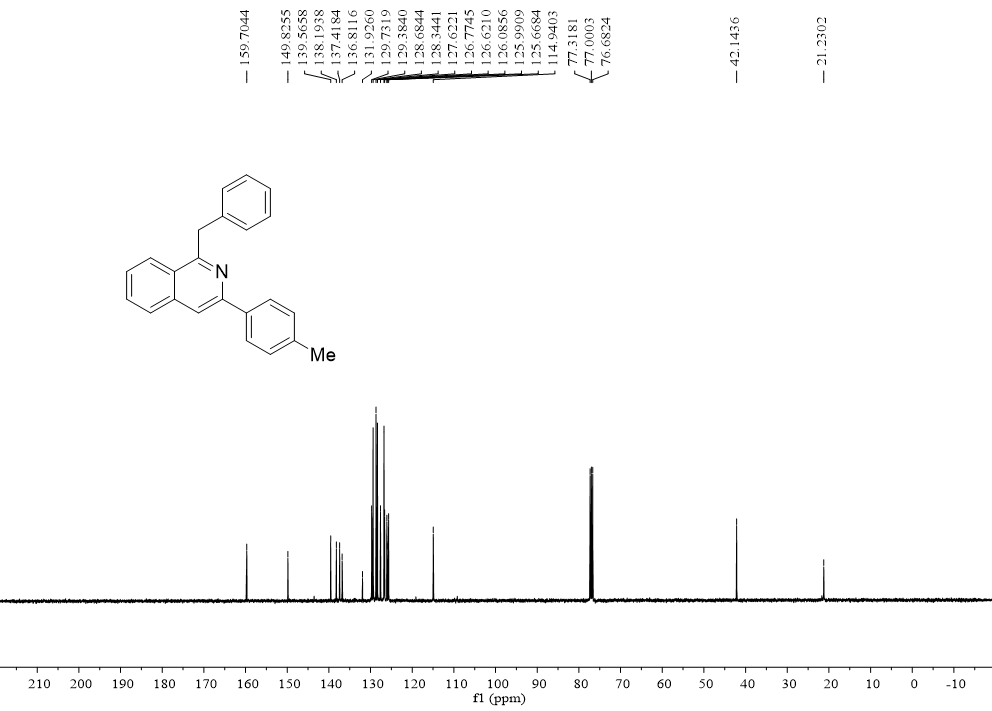


**1H NMR (500 MHz, CDCl3) spectrum of compound 3i**


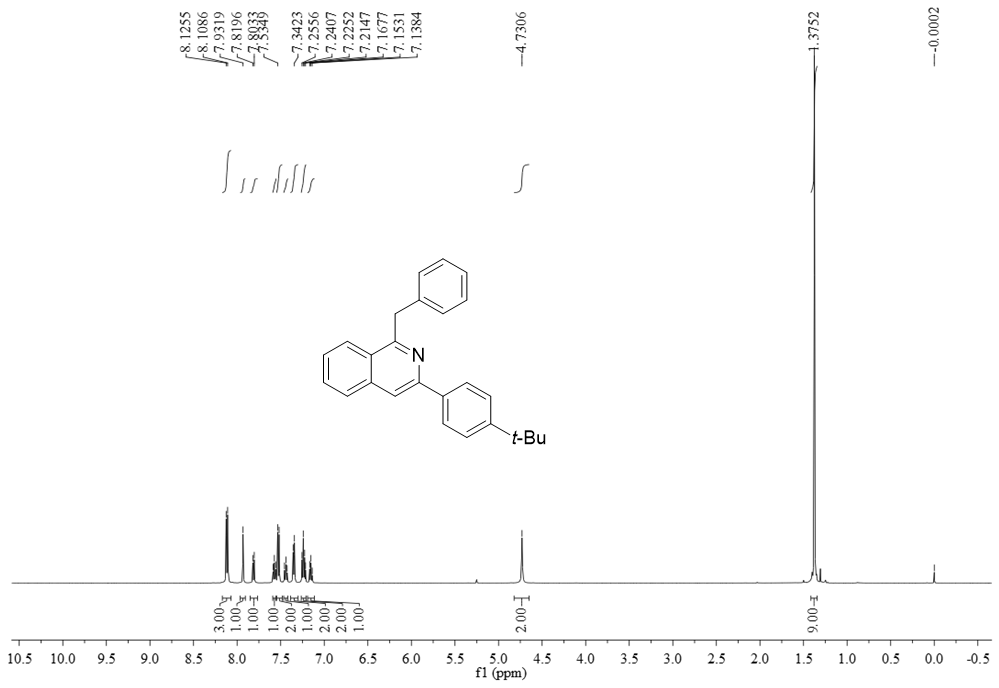


**13C NMR (125 MHz, CDCl3) spectrum of compound 3i**


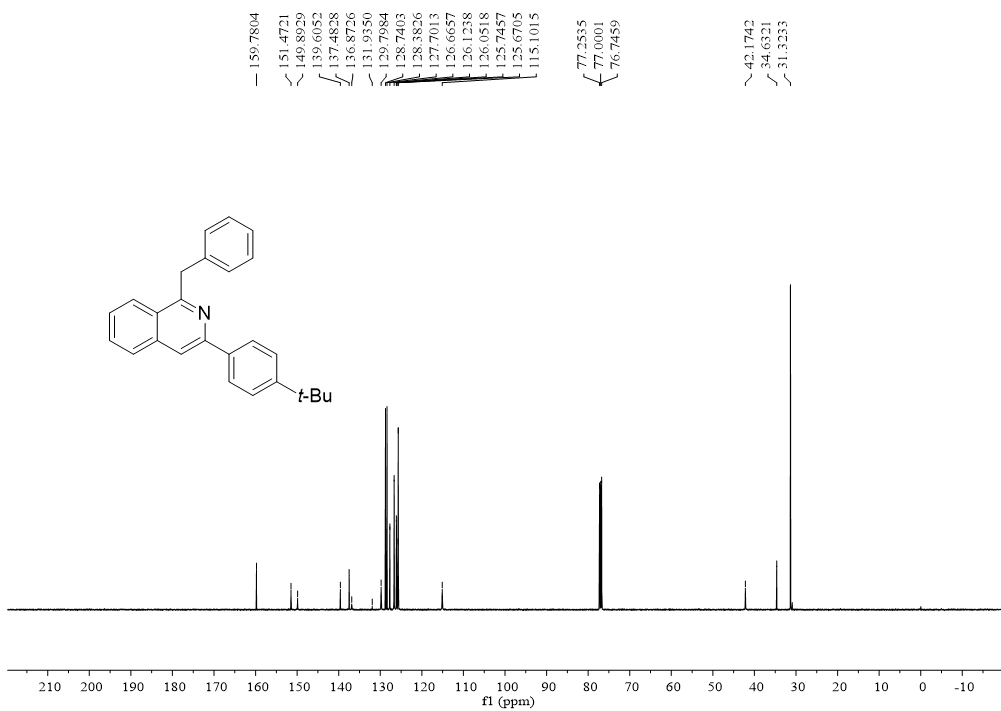


**1H NMR (400 MHz, CDCl3) spectrum of compound 3j**


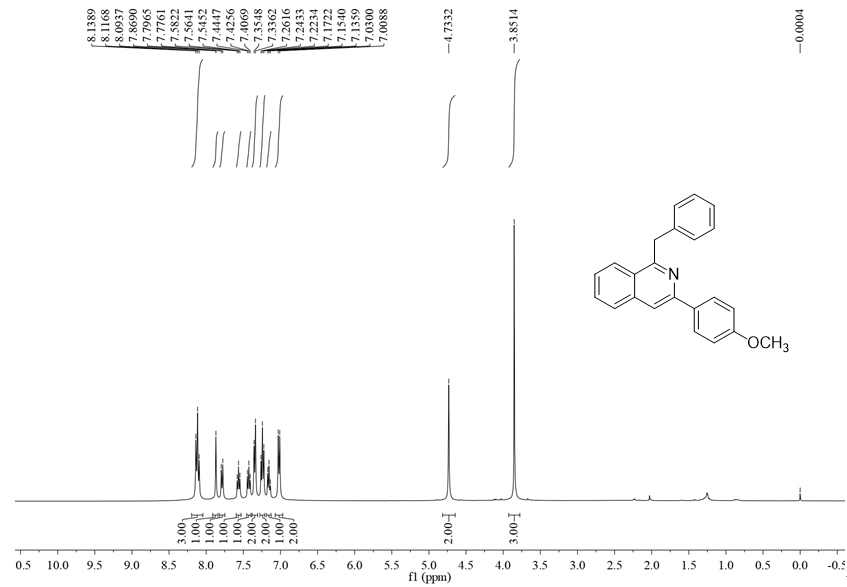


**13C NMR (100 MHz, CDCl3) spectrum of compound 3j**


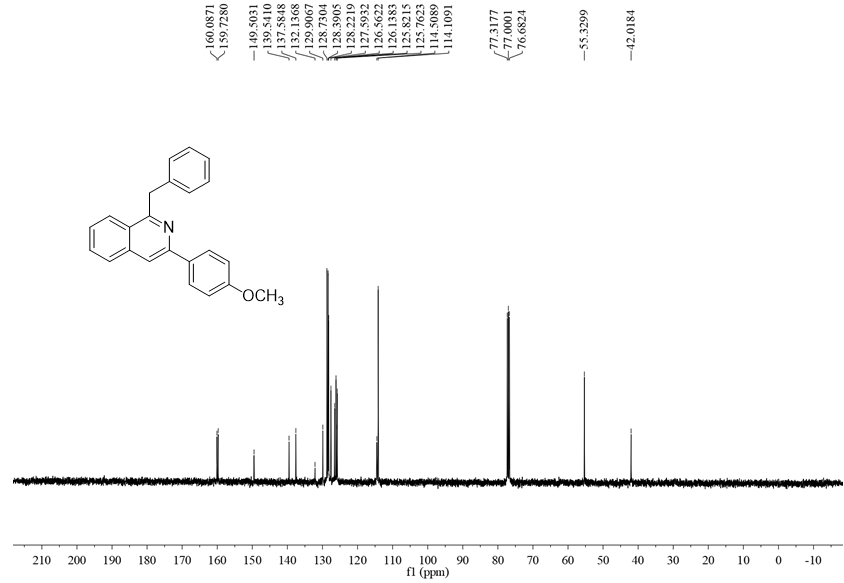


**1H NMR (400 MHz, CDCl3) spectrum of compound 3k**


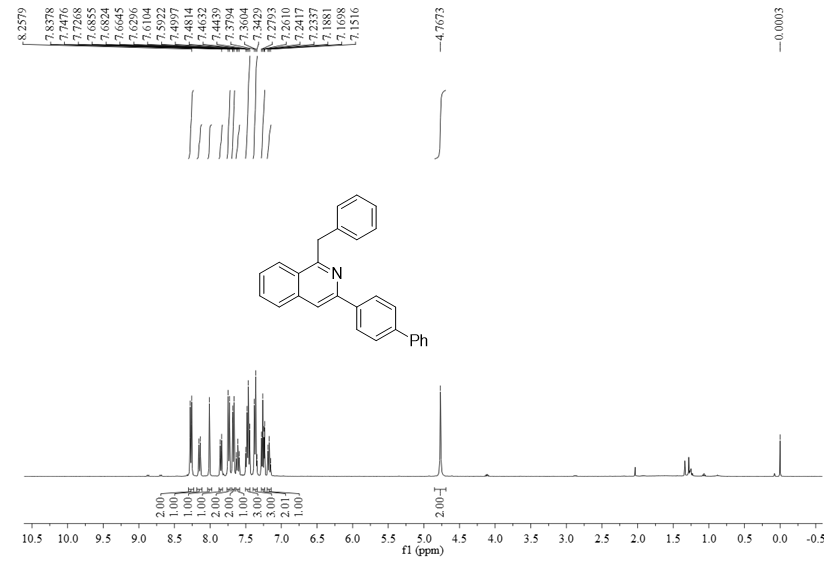


**13C NMR (100 MHz, CDCl3) spectrum of compound 3k**


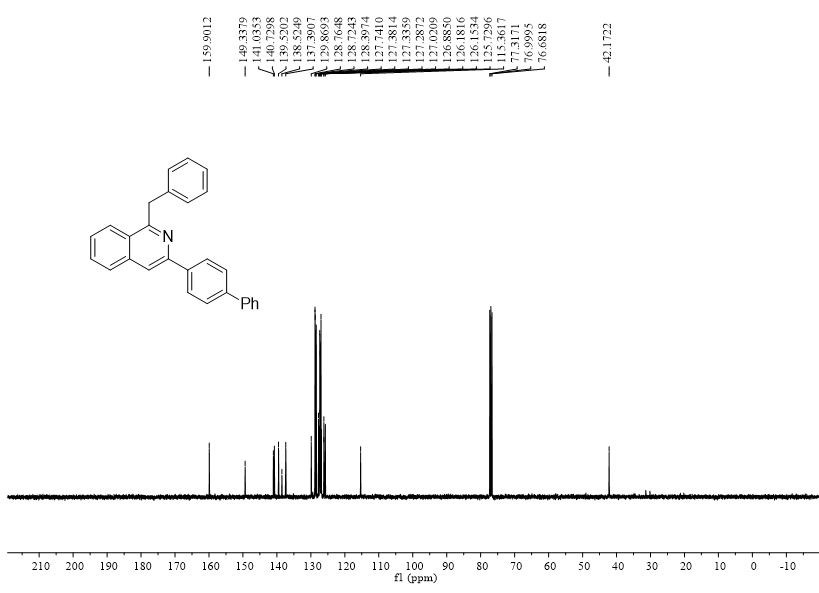


**1H NMR (500 MHz, CDCl3) spectrum of compound 3l**


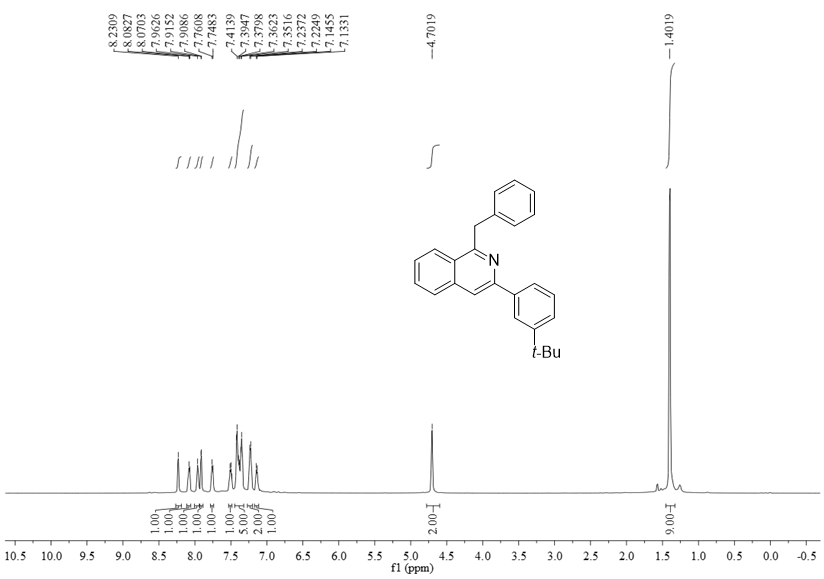


**13C NMR (125 MHz, CDCl3) spectrum of compound 3l**


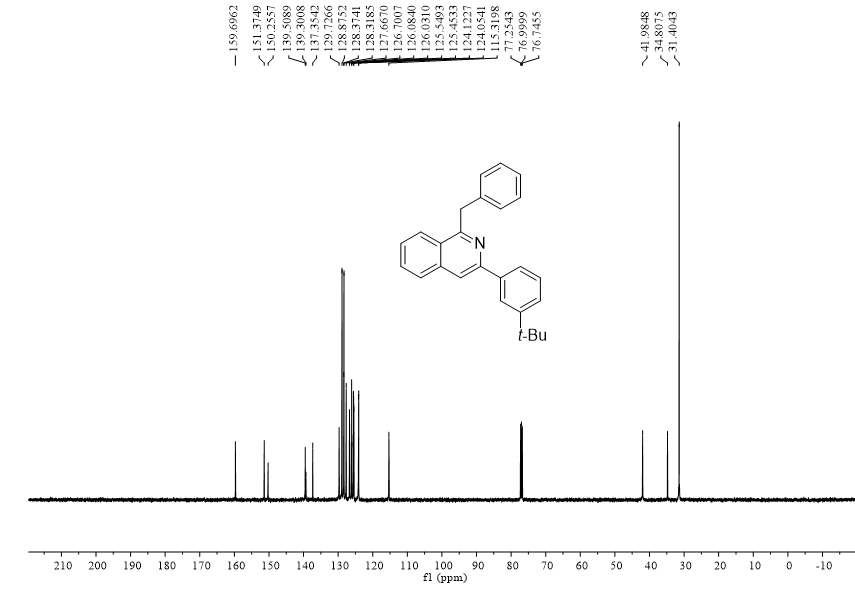


**1H NMR (400 MHz, CDCl3) spectrum of compound 3m**


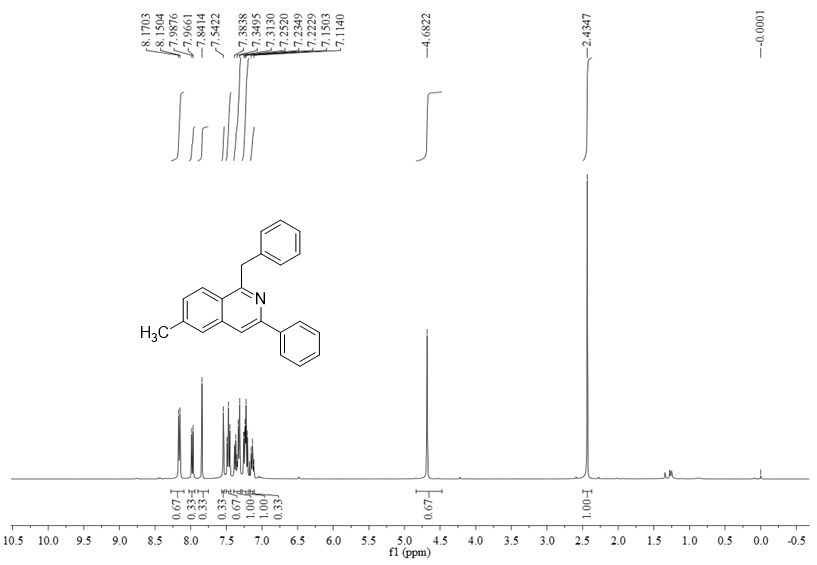


**13C NMR (100 MHz, CDCl3) spectrum of compound 3m**


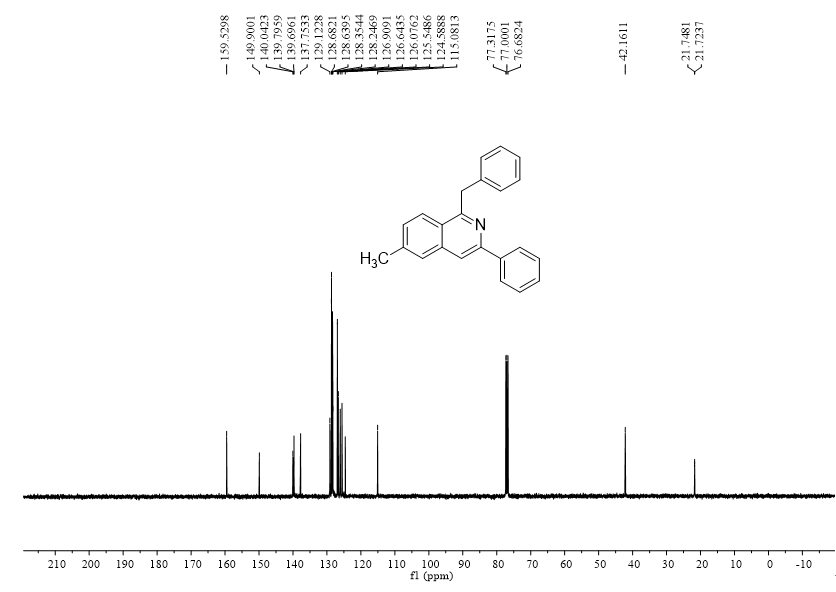


**1H NMR (400 MHz, CDCl3) spectrum of compound 3n**


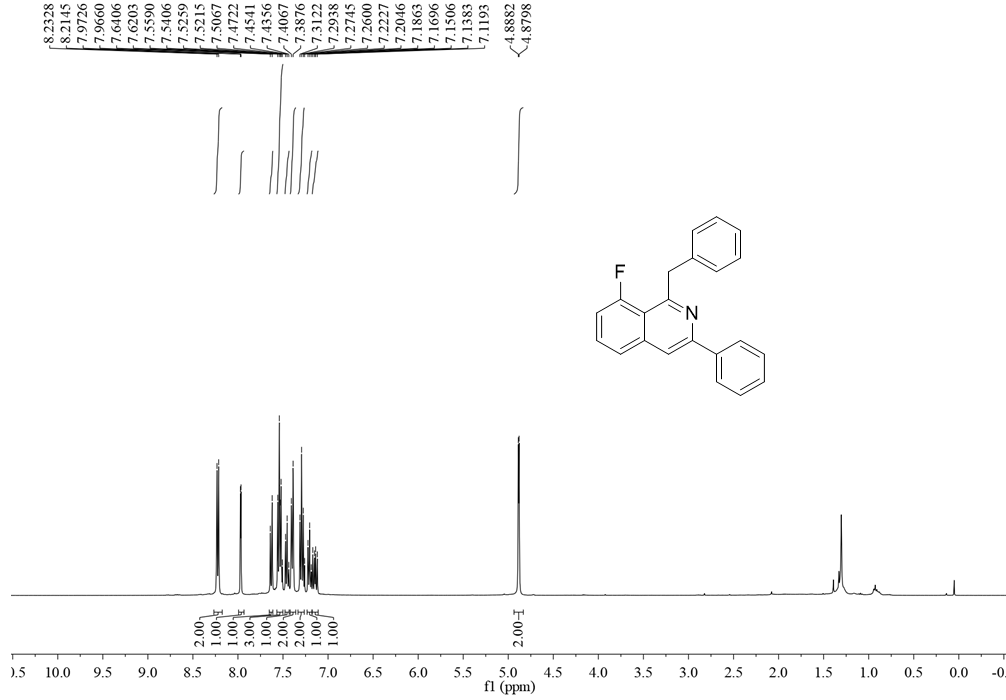


**13C NMR (100 MHz, CDCl3) spectrum of compound 3n**


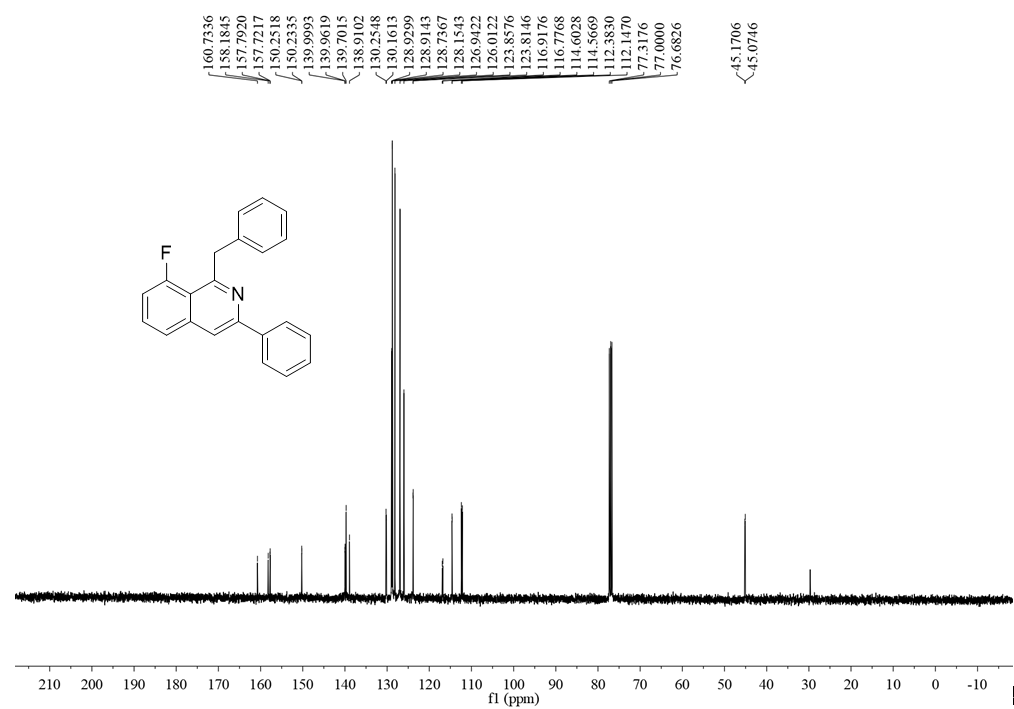


**1H NMR (500 MHz, CDCl3) spectrum of compound 3o**


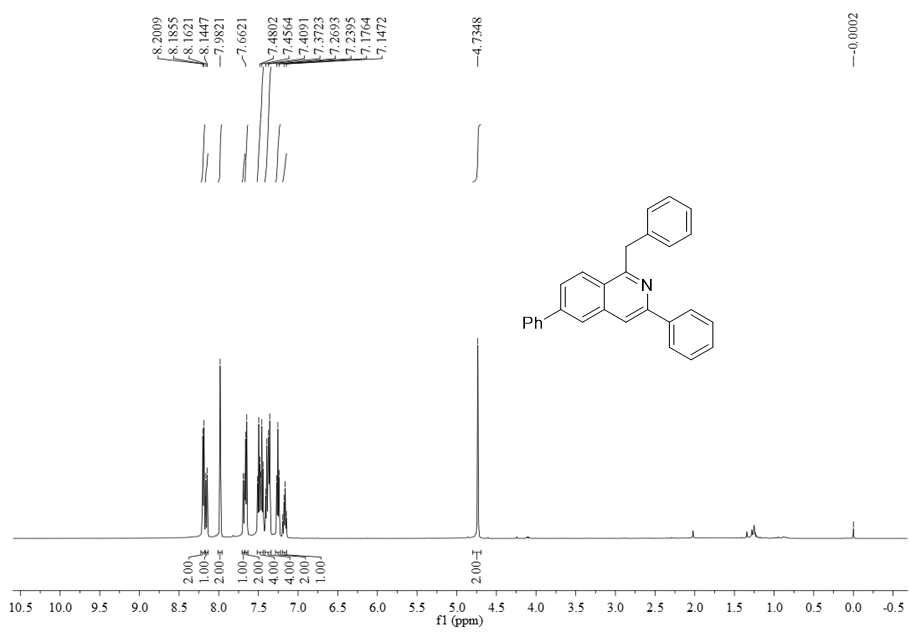


**13C NMR (125 MHz, CDCl3) spectrum of compound 3o**


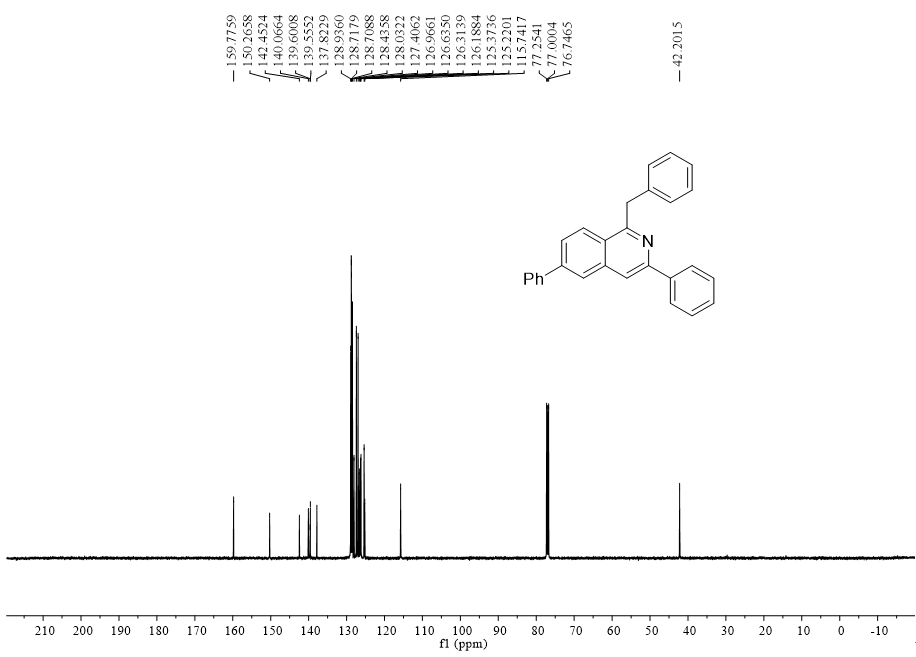


**1H NMR (500 MHz, CDCl3) spectrum of compound 3p**


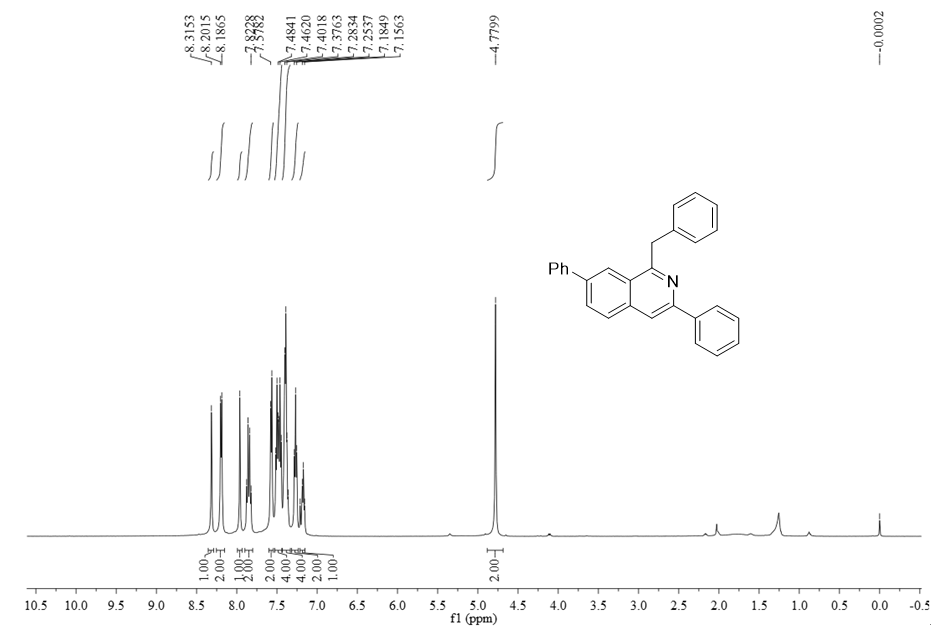


**13C NMR (125 MHz, CDCl3) spectrum of compound 3p**


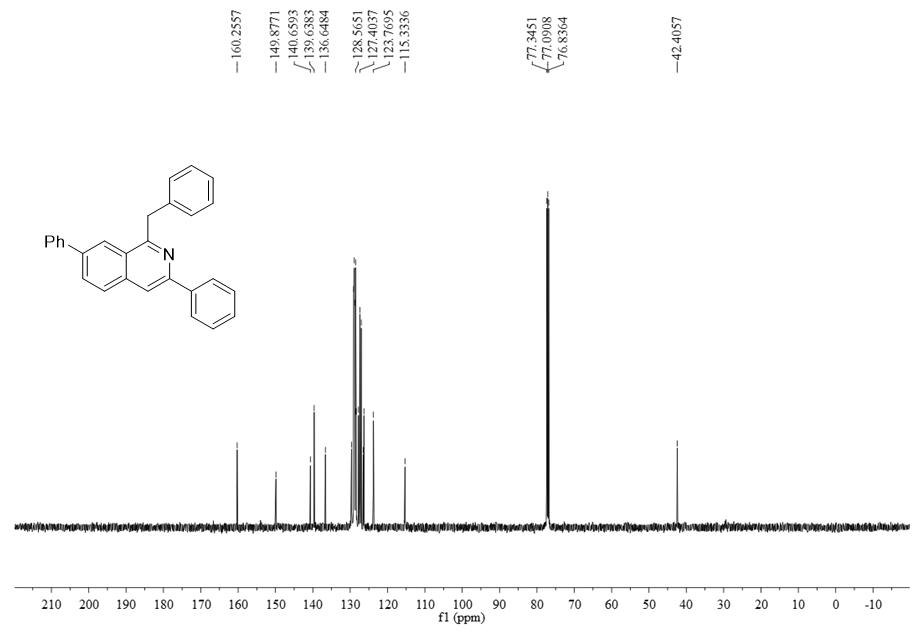


**1H NMR (400 MHz, CDCl3) spectrum of compound 3q**


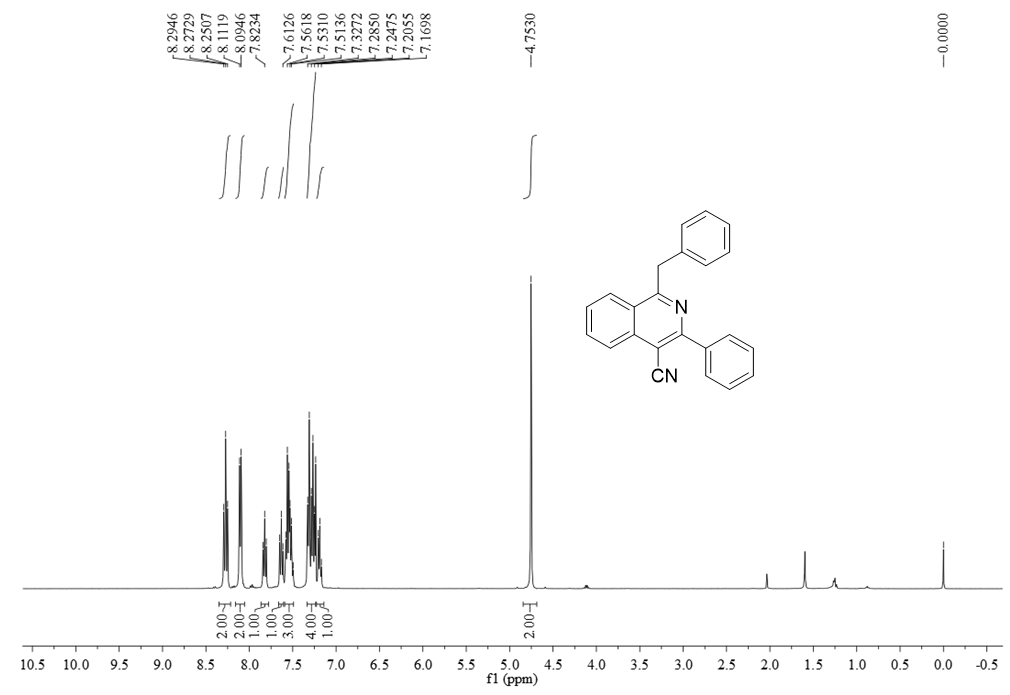


**13C NMR (100 MHz, CDCl3) spectrum of compound 3q**


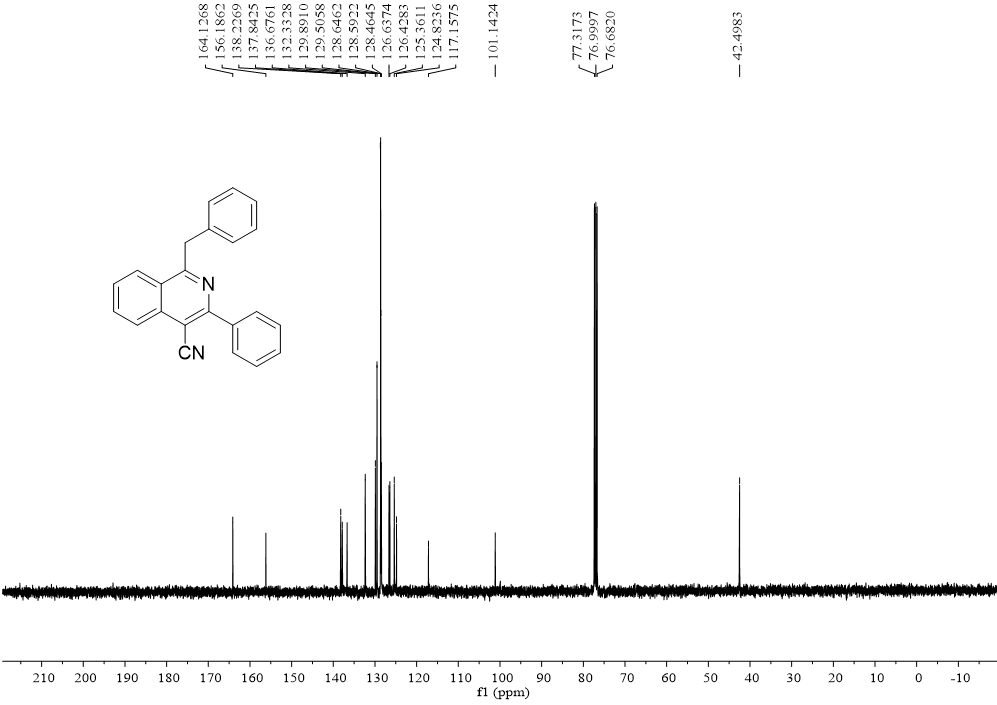


**1H NMR (400 MHz, CDCl3) spectrum of compound 3r**


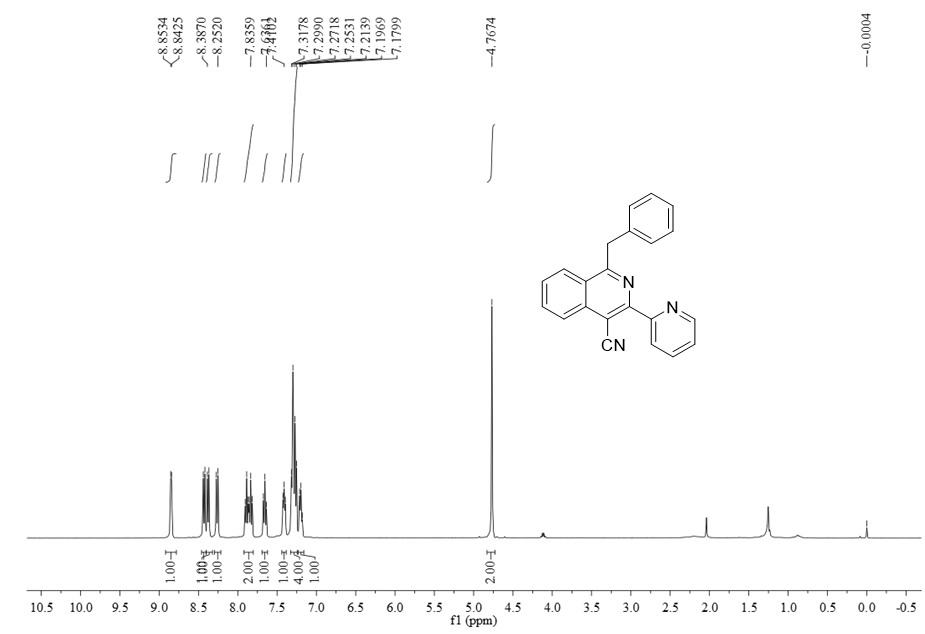


**13C NMR (100 MHz, CDCl3) spectrum of compound 3r**


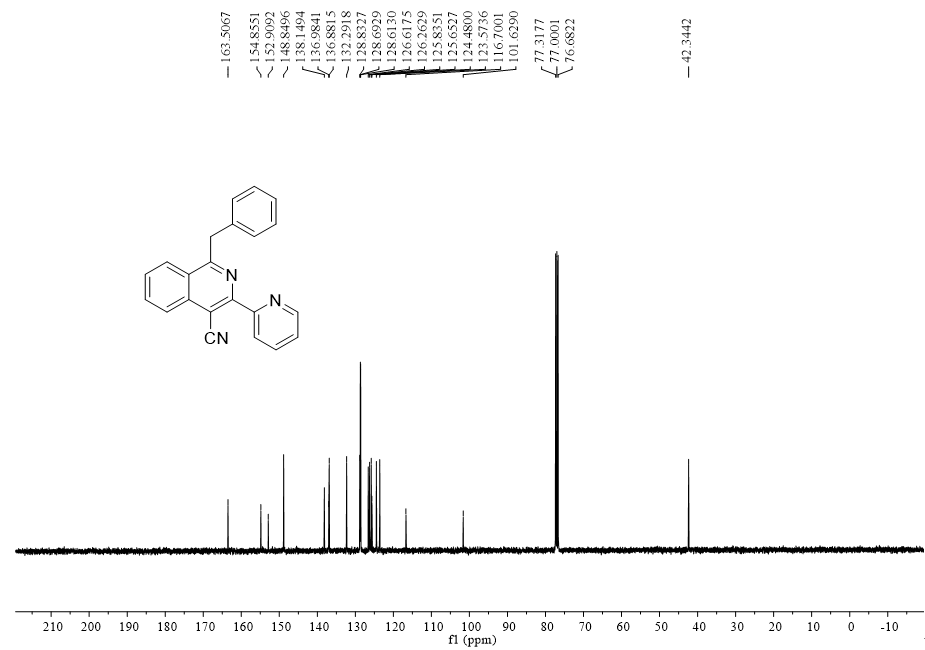


**1H NMR (500 MHz, CDCl3) spectrum of compound 3s**


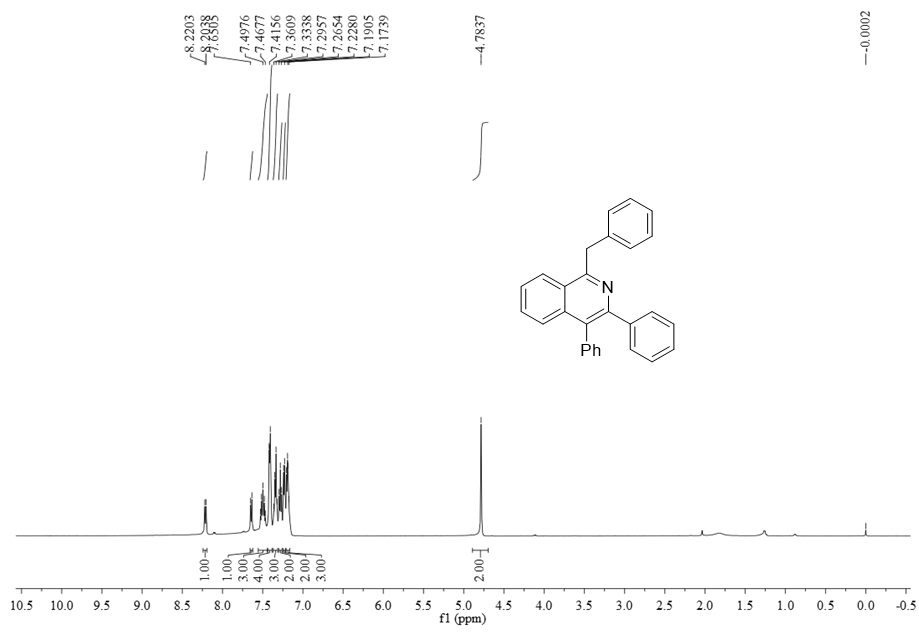


**13C NMR (125 MHz, CDCl3) spectrum of compound 3s**


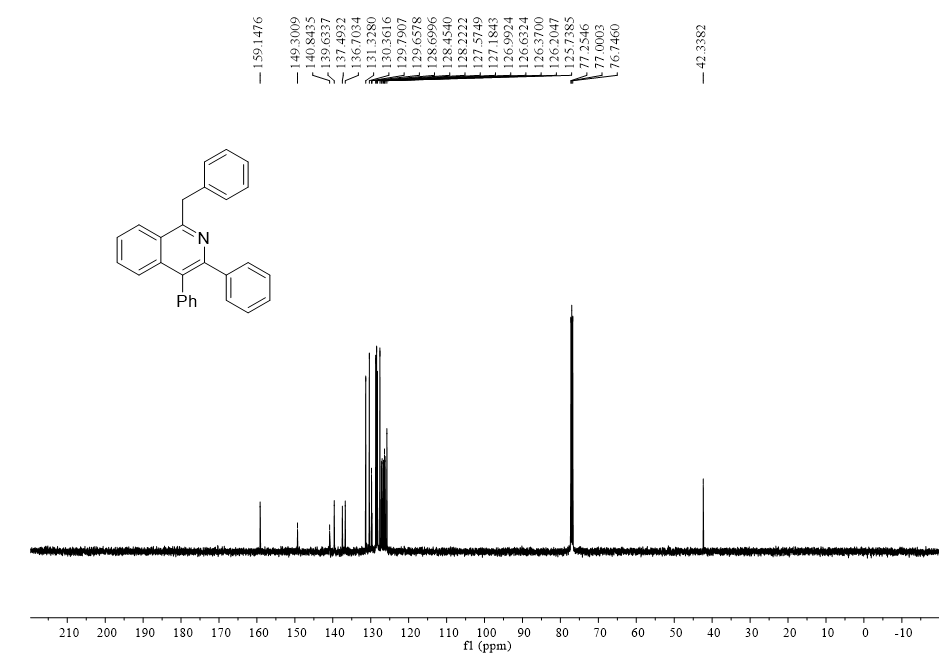


**1H NMR (400 MHz, CDCl3) spectrum of compound 3t**


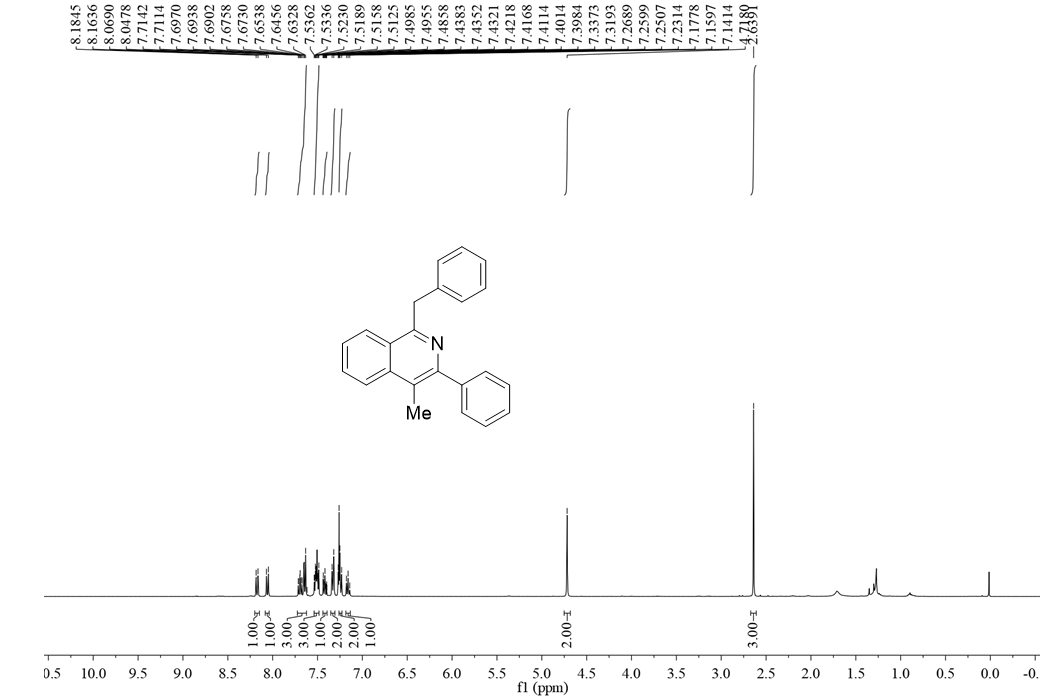


**13C NMR (100 MHz, CDCl3) spectrum of compound 3t**


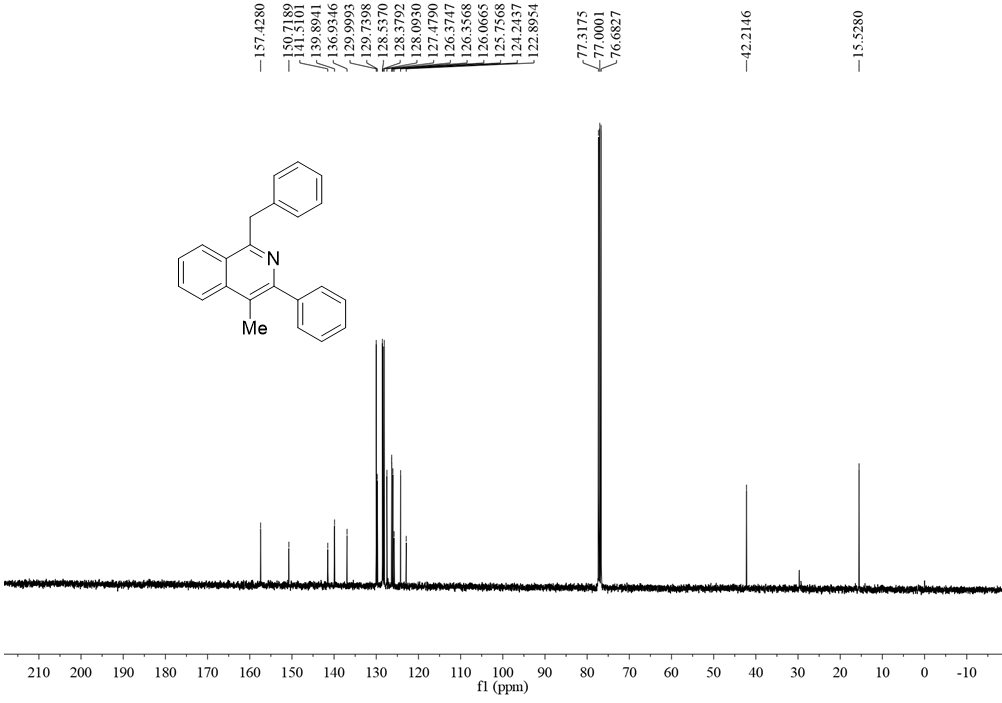


**1H NMR (400 MHz, CDCl3) spectrum of compound 5a**


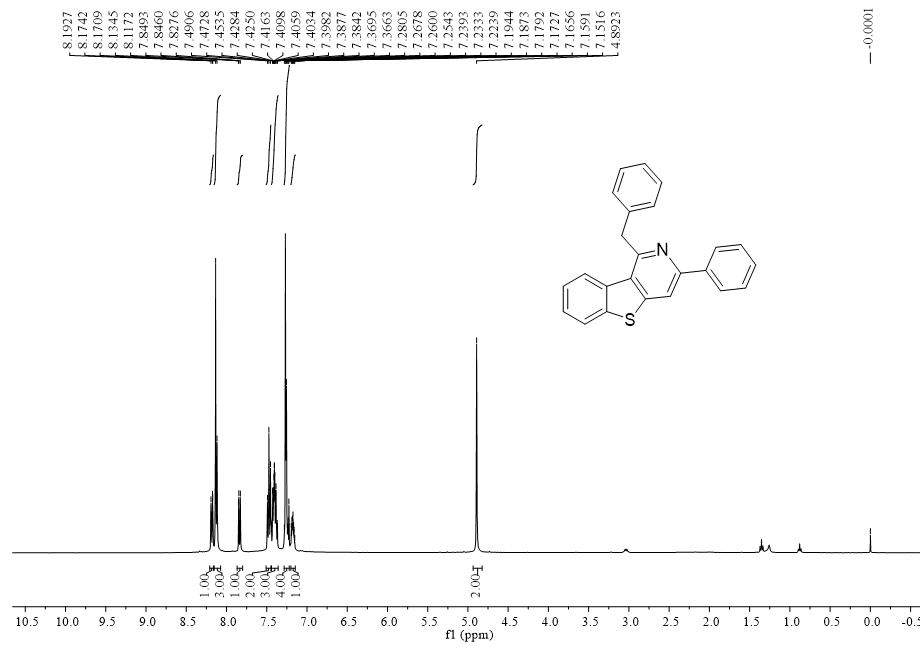


**13C NMR (100 MHz, CDCl3) spectrum of compound 5a**


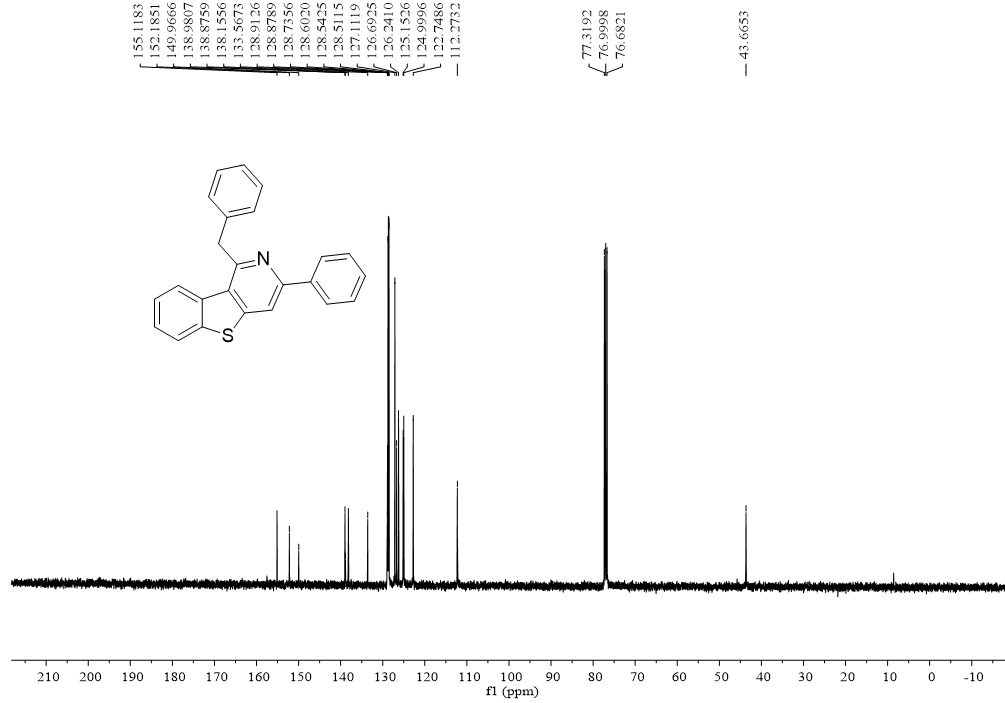


**1H NMR (400 MHz, CDCl3) spectrum of compound 5b**


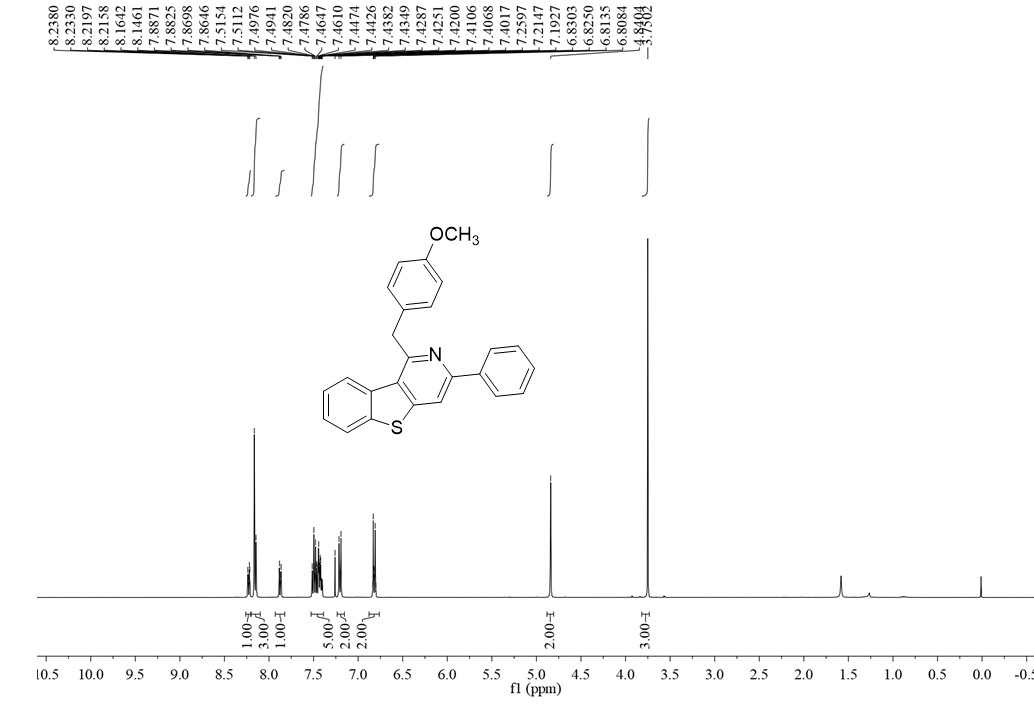


**13C NMR (100 MHz, CDCl3) spectrum of compound 5b**


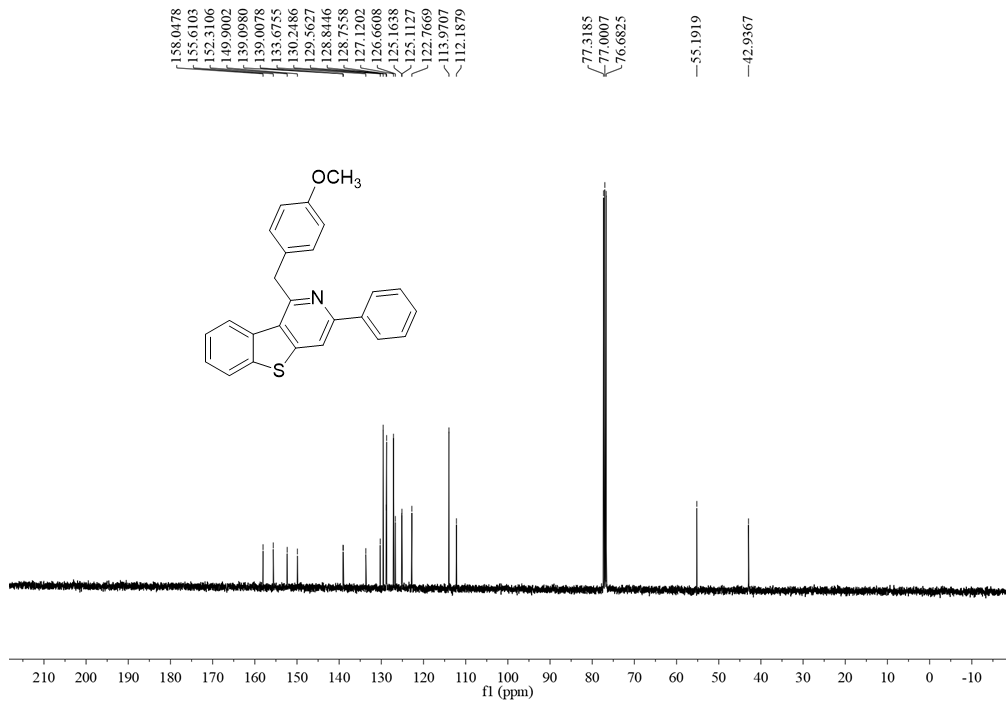


**1H NMR (400 MHz, CDCl3) spectrum of compound 5c**


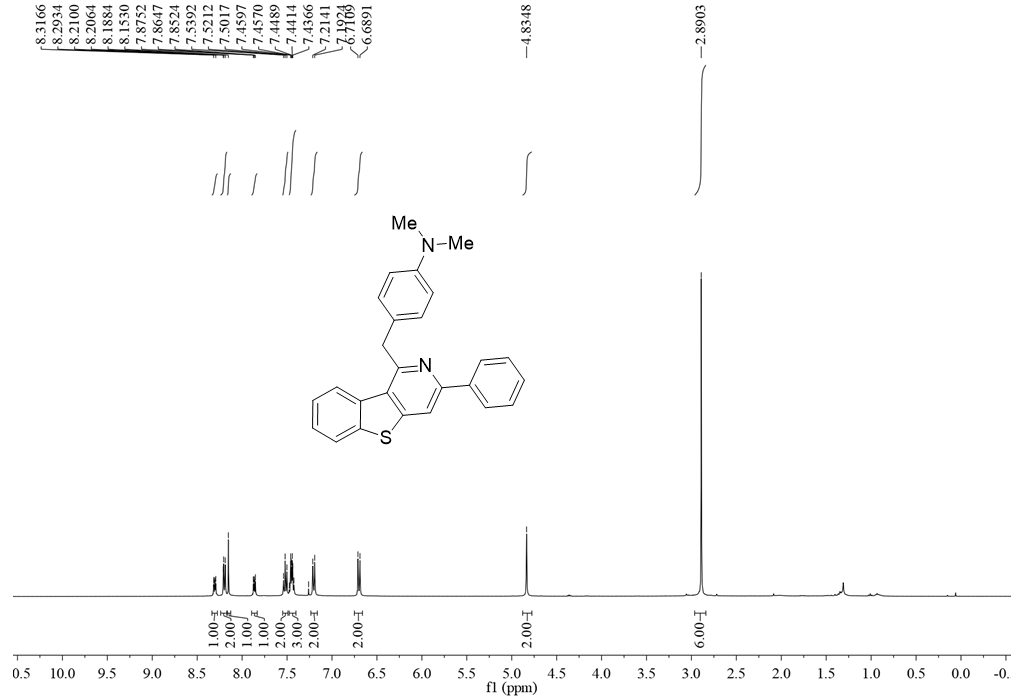


**13C NMR (100 MHz, CDCl3) spectrum of compound 5c**


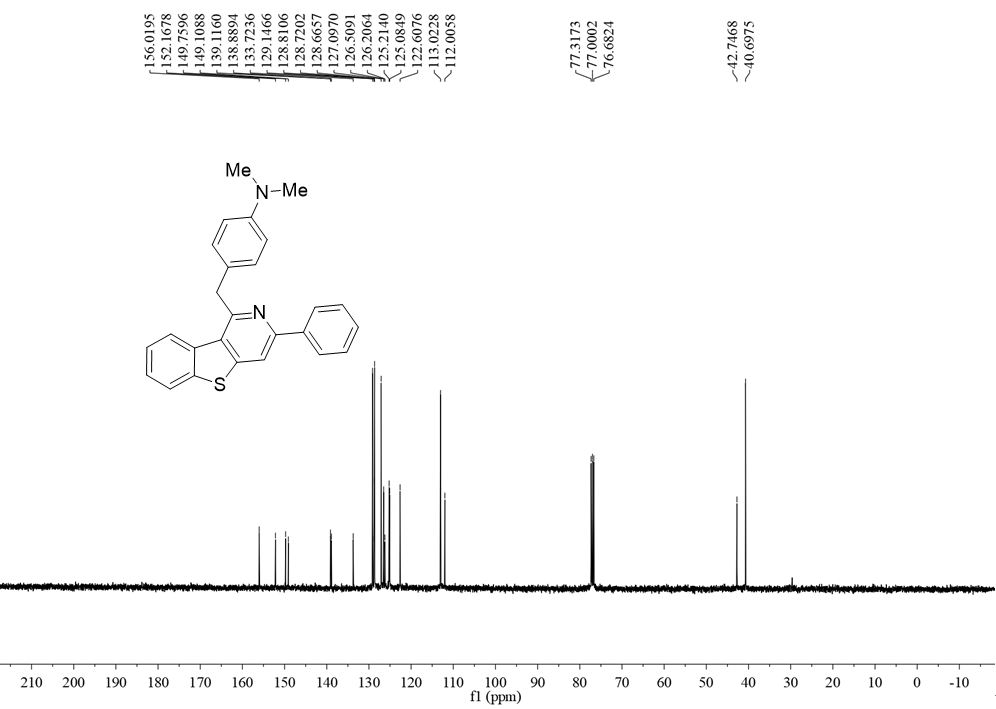


**1H NMR (400 MHz, CDCl3) spectrum of compound 5d**


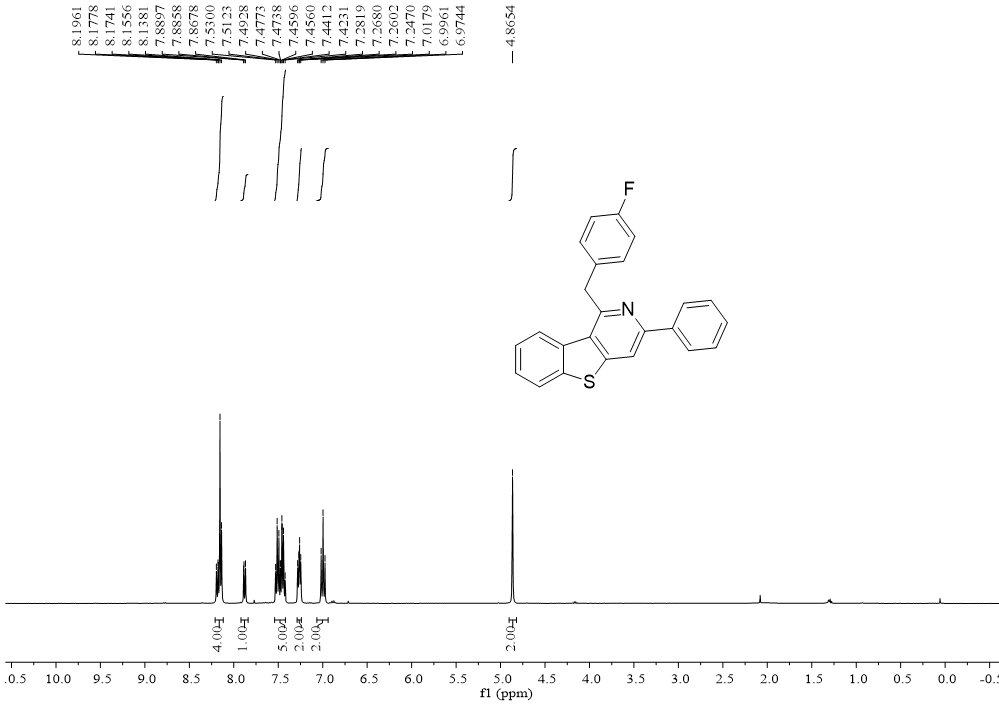


**13C NMR (100 MHz, CDCl3) spectrum of compound 5d**


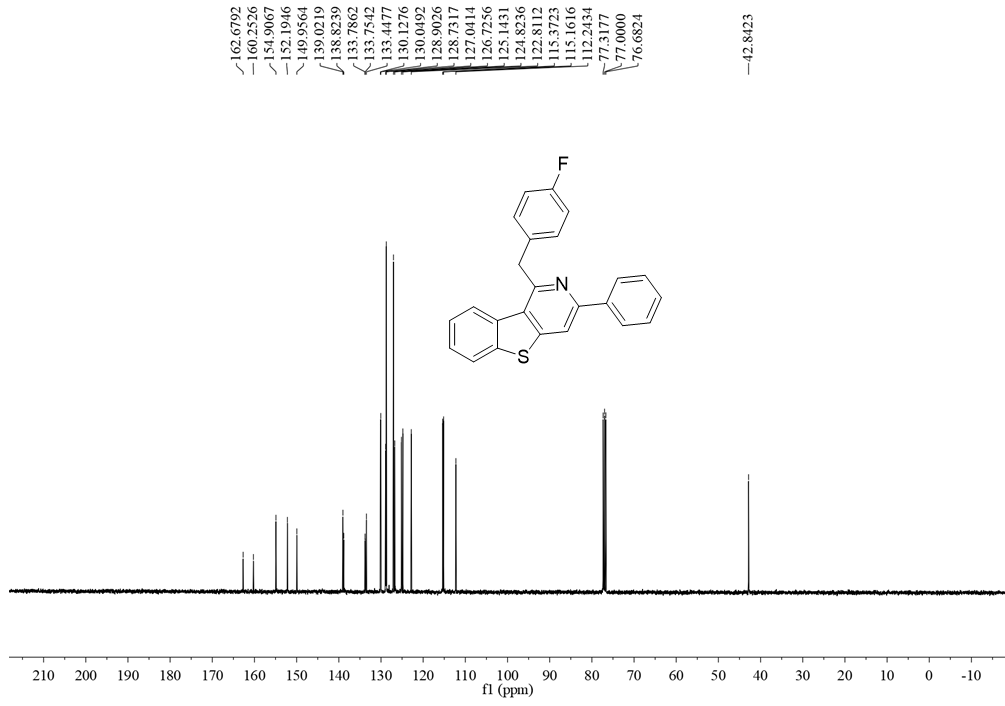


**1H NMR (400 MHz, CDCl3) spectrum of compound 5e**


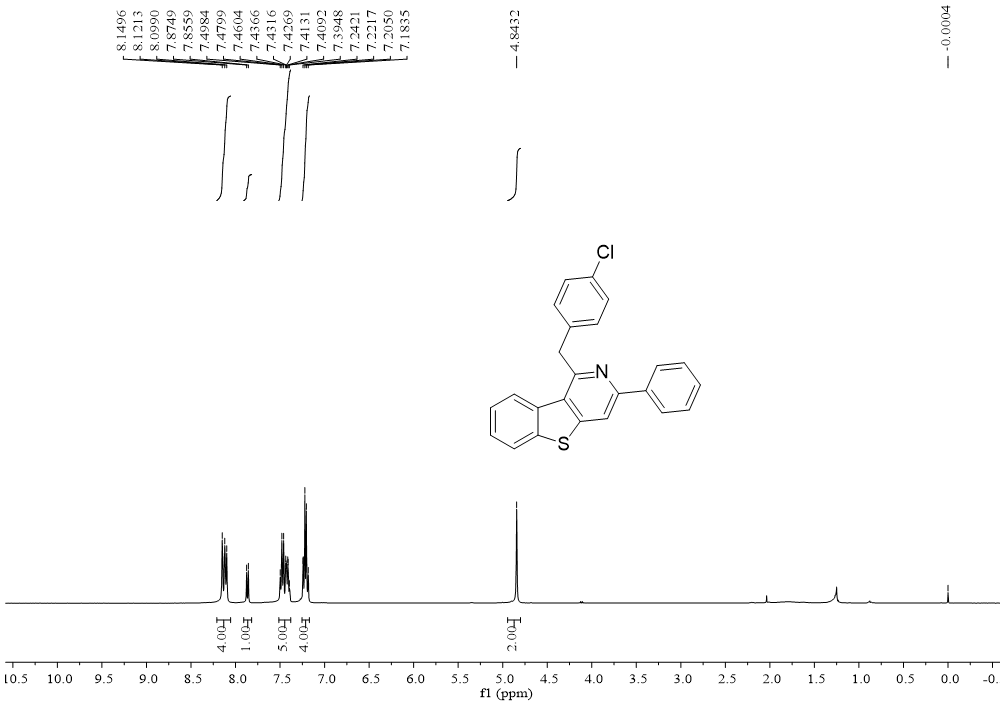


**13C NMR (100 MHz, CDCl3) spectrum of compound 5e**


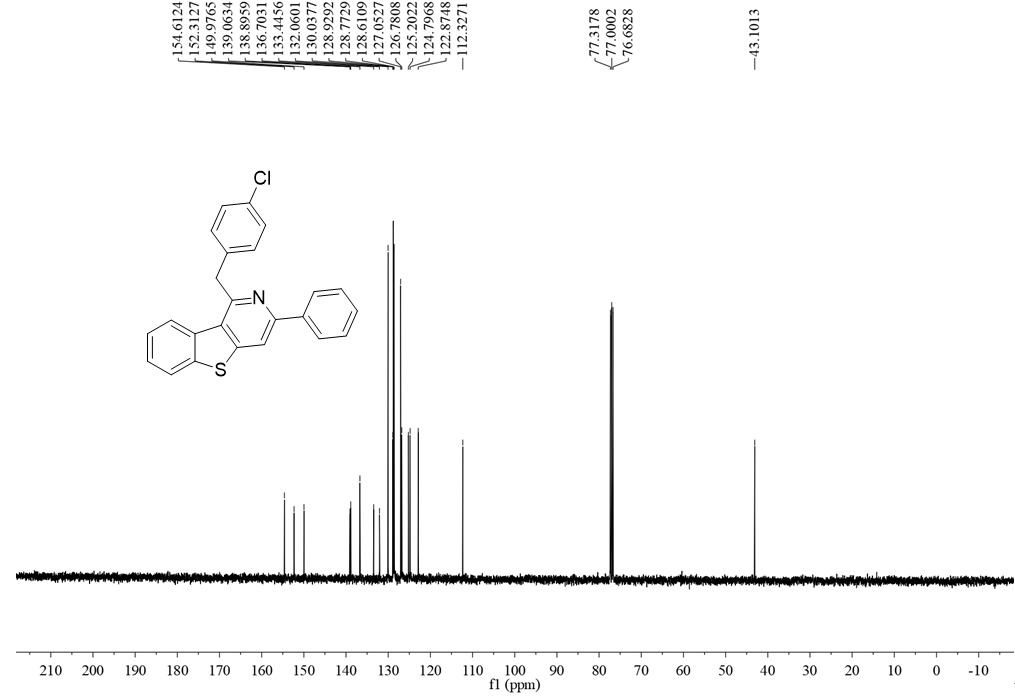


**1H NMR (400 MHz, CDCl3) spectrum of compound 5f**


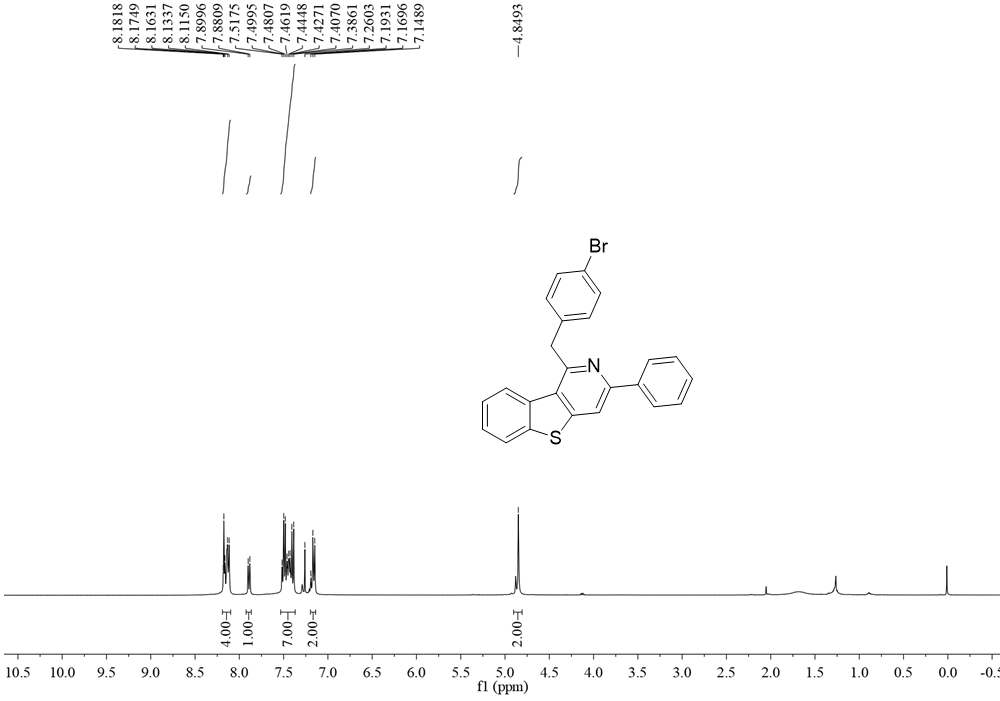


**13C NMR (100 MHz, CDCl3) spectrum of compound 5f**


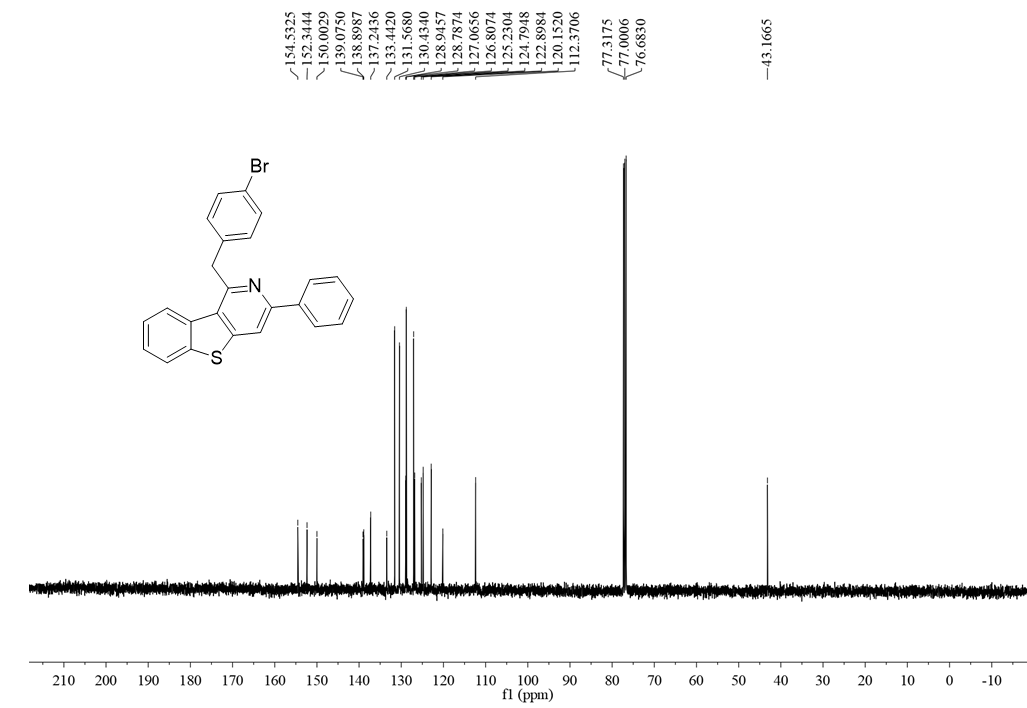


**1H NMR (400 MHz, CDCl3) spectrum of compound 5g**


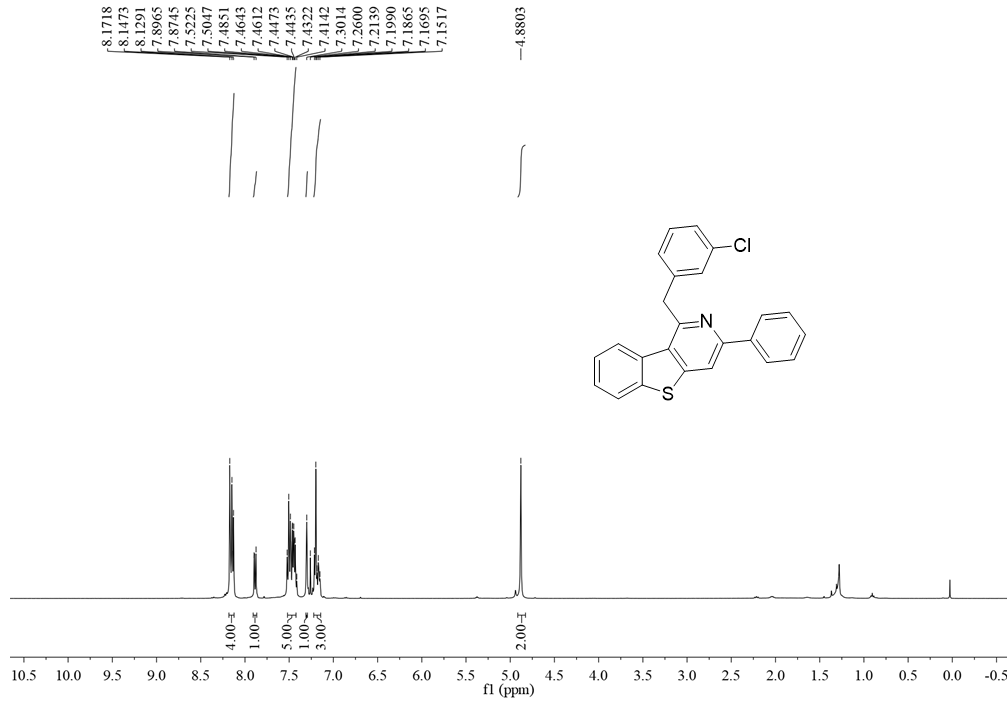


**13C NMR (100 MHz, CDCl3) spectrum of compound 5g**


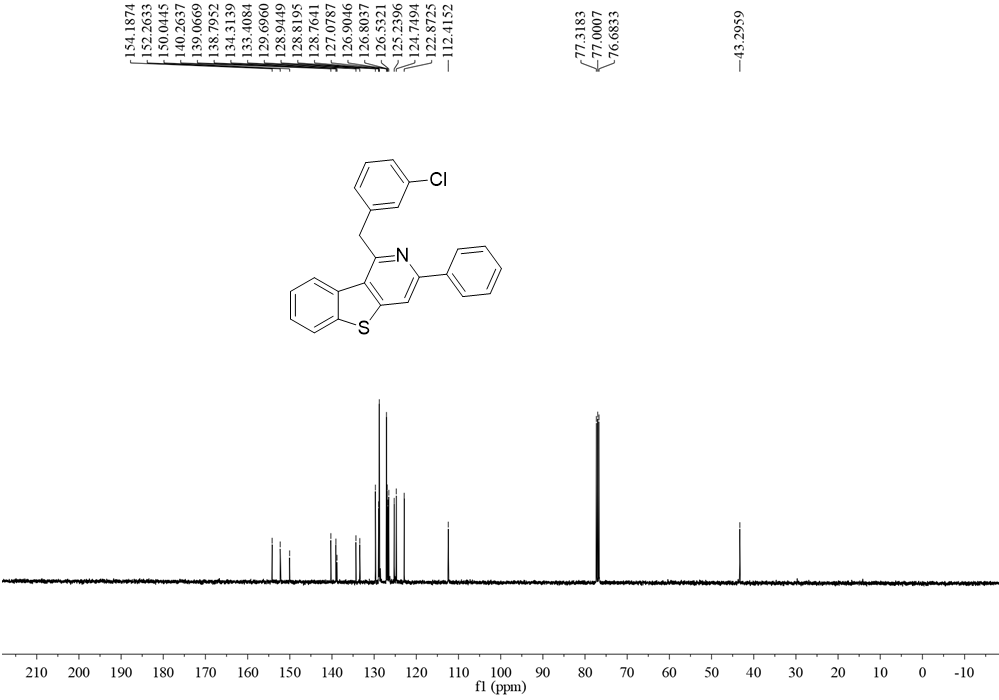


**1H NMR (400 MHz, CDCl3) spectrum of compound 5h**


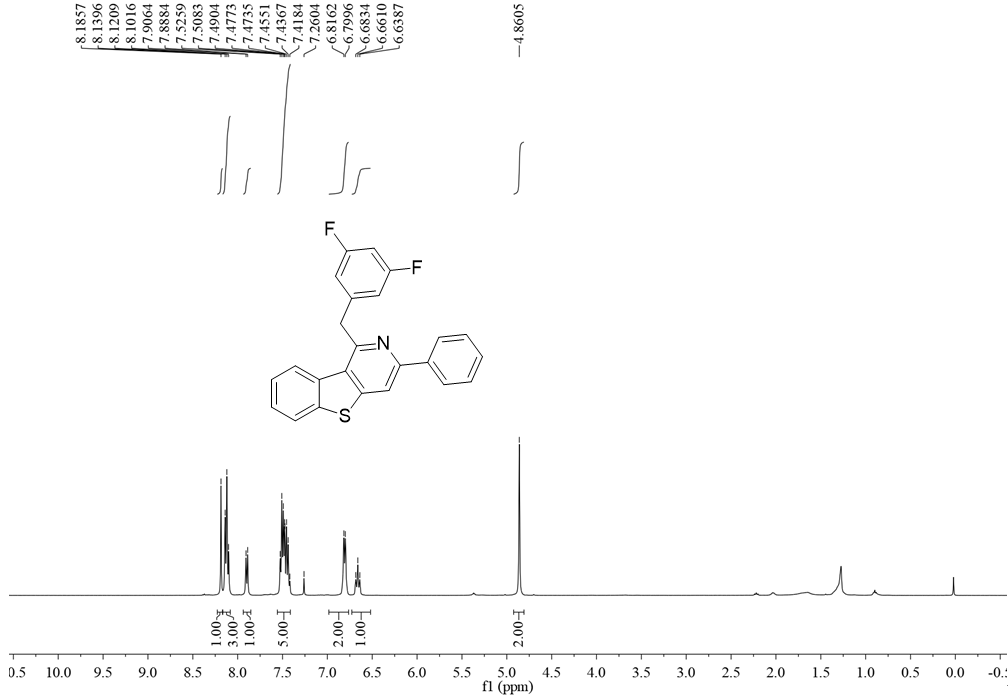


**13C NMR (100 MHz, CDCl3) spectrum of compound 5h**


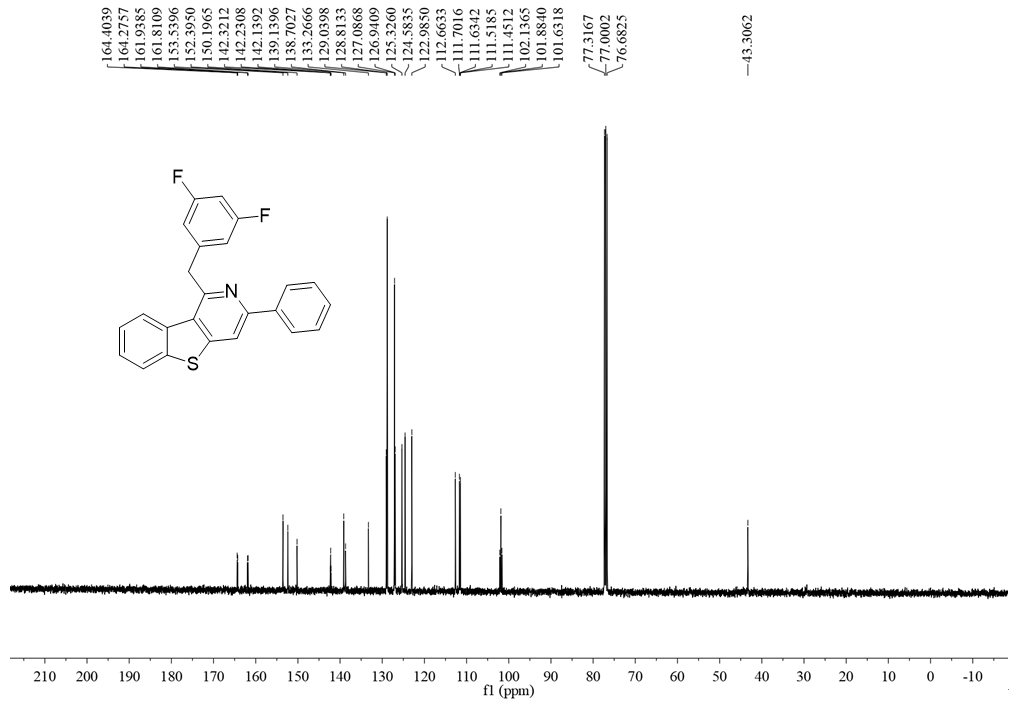


**1H NMR (400 MHz, CDCl3) spectrum of compound 5i**


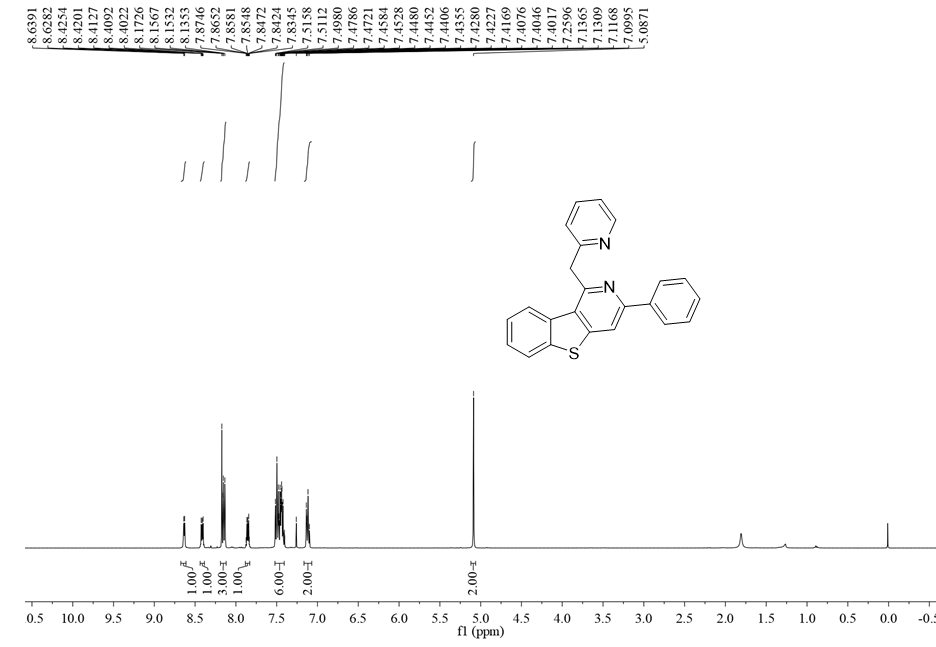


**13C NMR (100 MHz, CDCl3) spectrum of compound 5i**


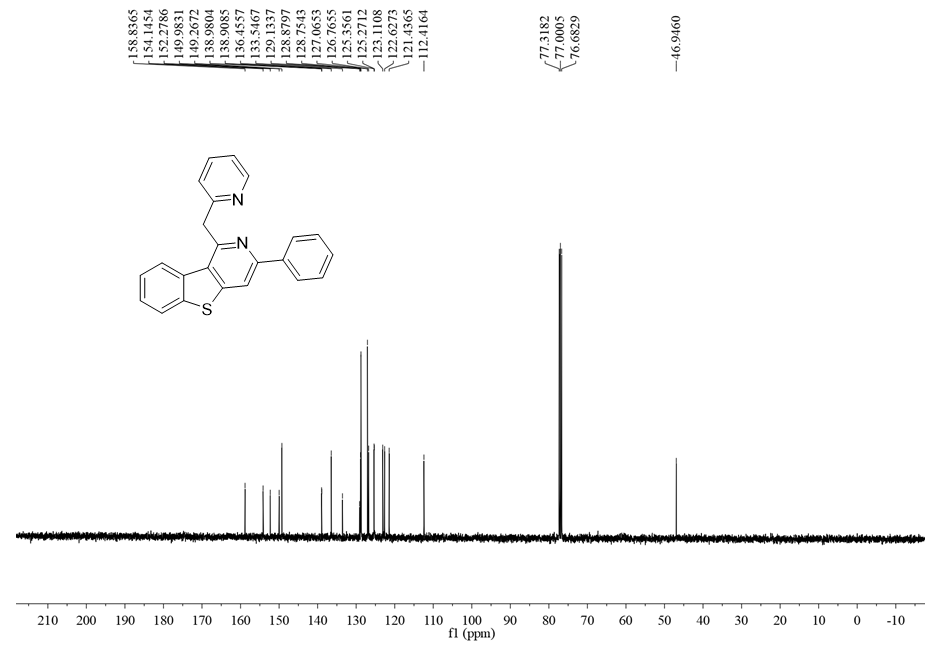


**1H NMR (400 MHz, CDCl3) spectrum of compound 5j**


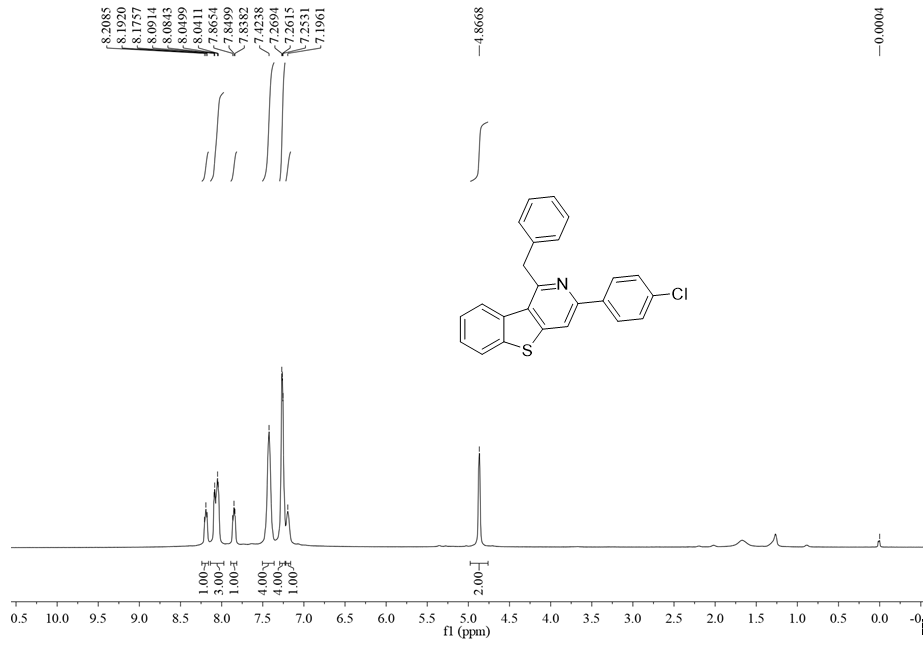


**13C NMR (100 MHz, CDCl3) spectrum of compound 5j**


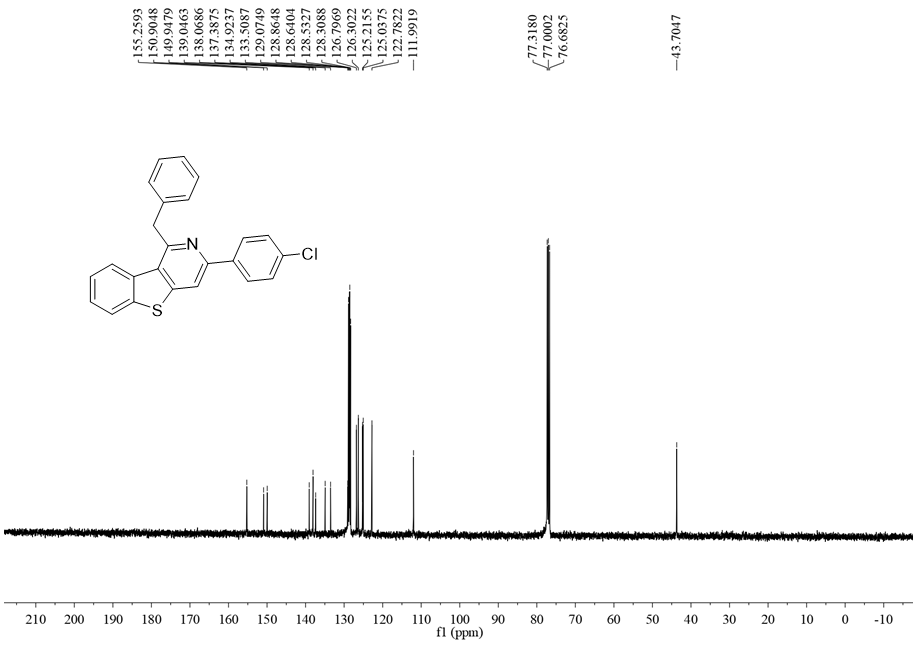


**1H NMR (400 MHz, CDCl3) spectrum of compound 5k**


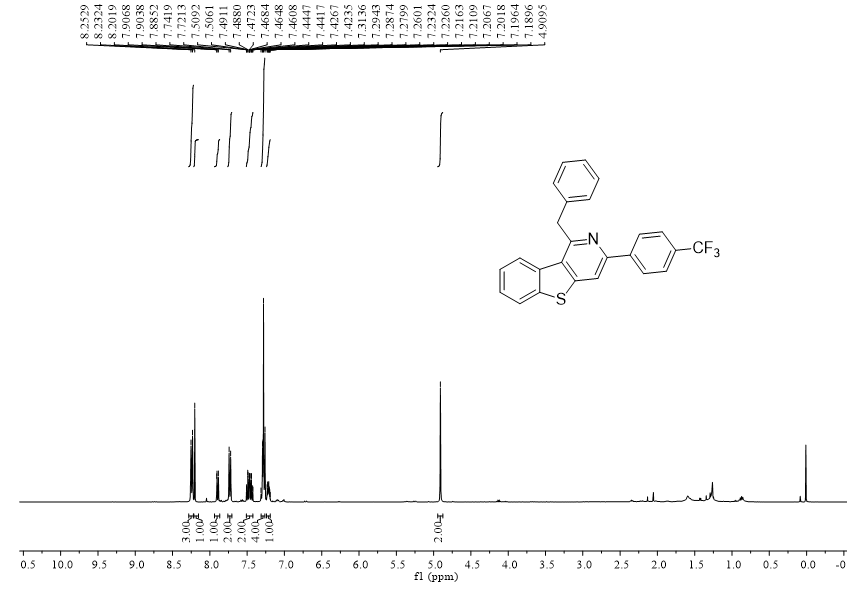


**13C NMR (100 MHz, CDCl3) spectrum of compound 5k**


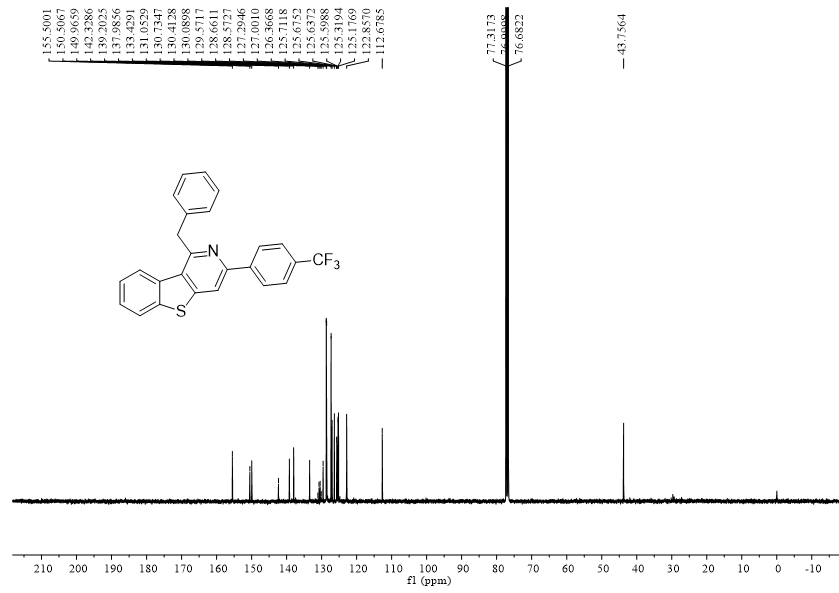


**1H NMR (400 MHz, CDCl3) spectrum of compound 5l**


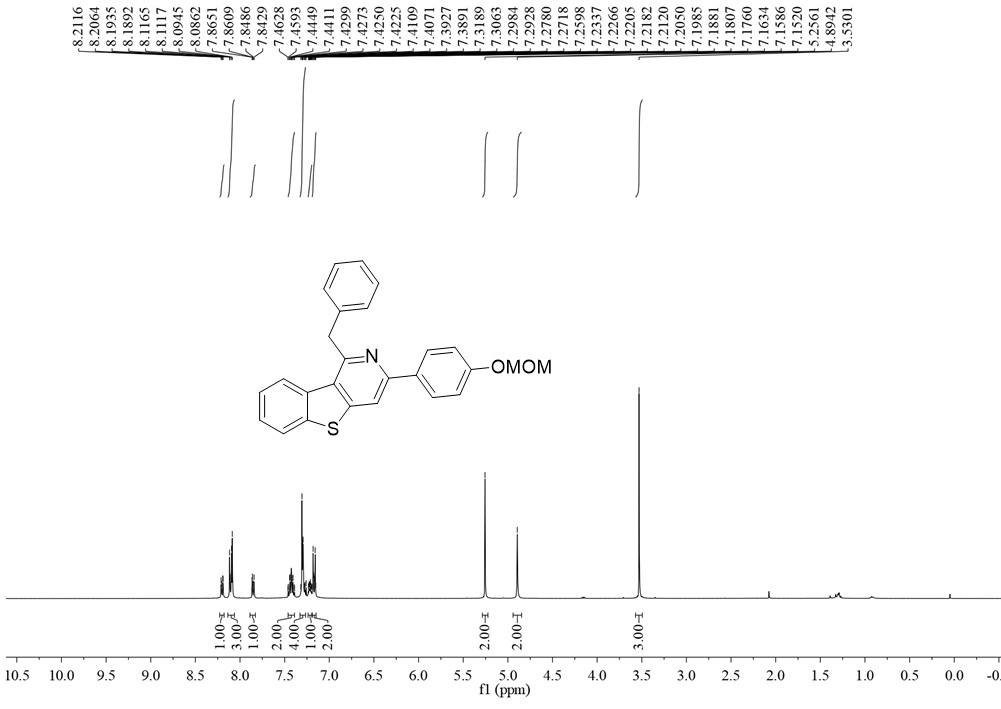


**13C NMR (100 MHz, CDCl3) spectrum of compound 5l**


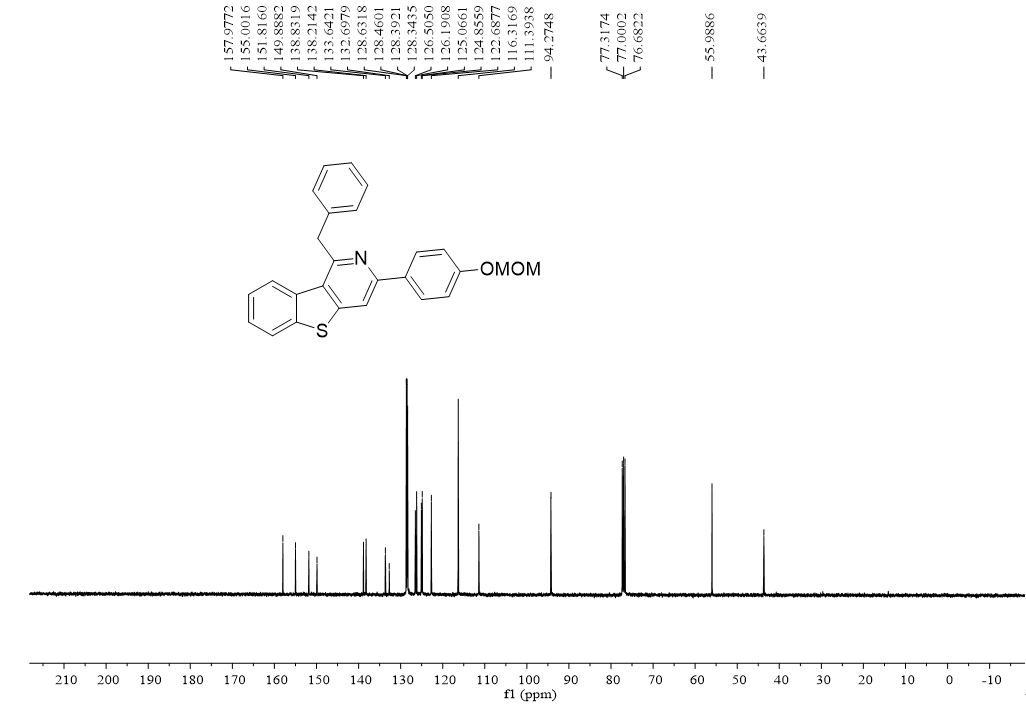


**1H NMR (400 MHz, CDCl3) spectrum of compound 5m**


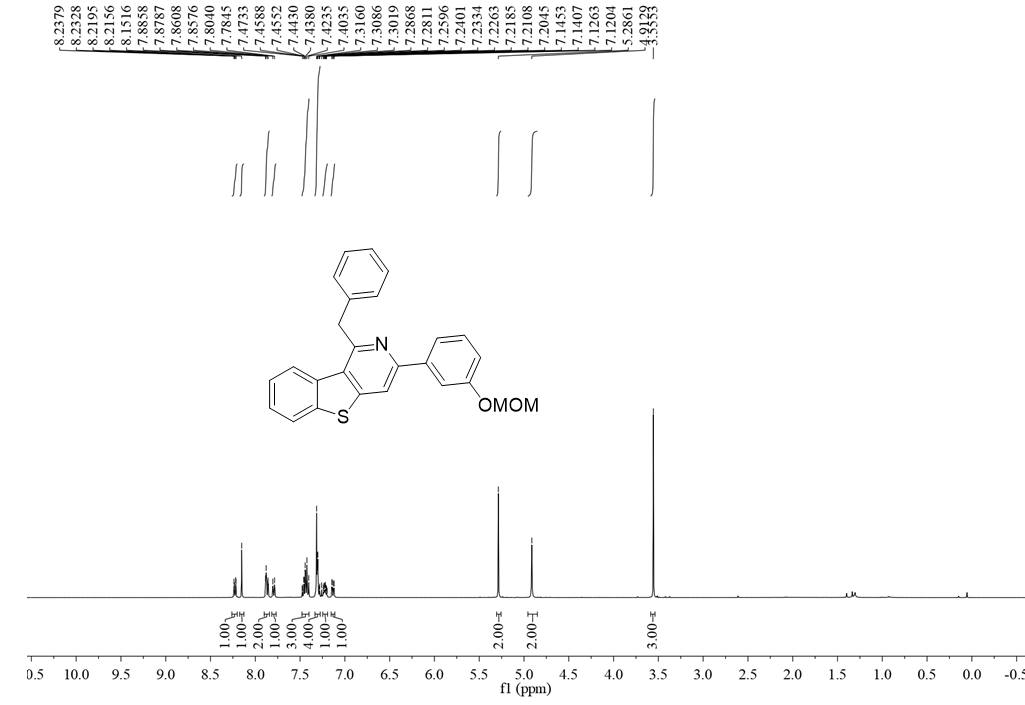


**13C NMR (100 MHz, CDCl3) spectrum of compound 5m**


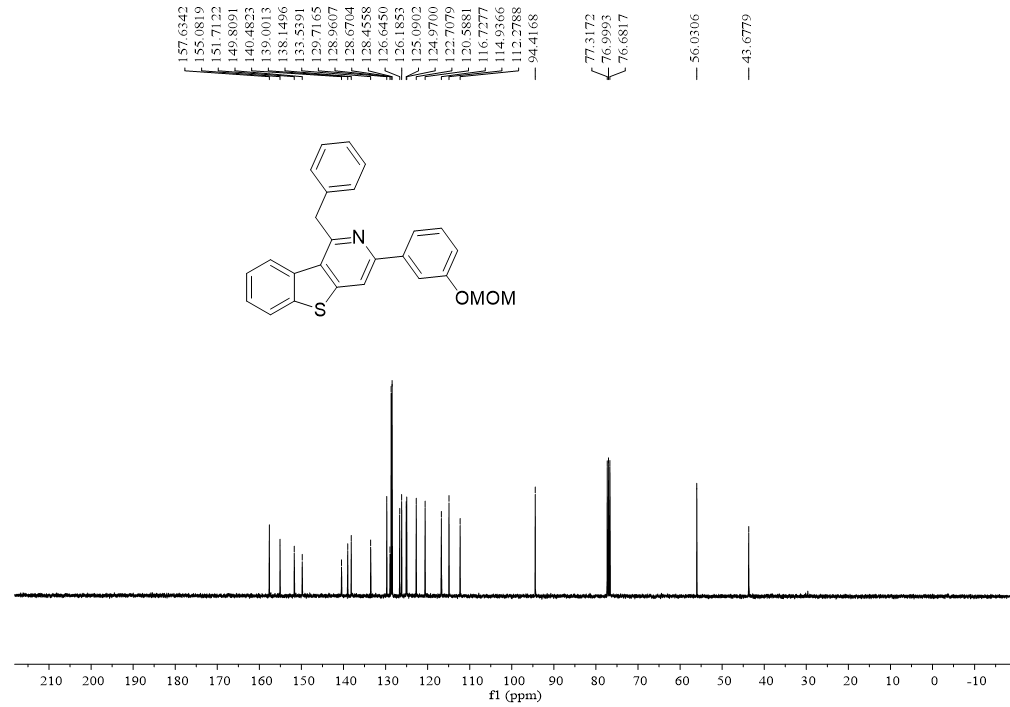


**1H NMR (400 MHz, CDCl3) spectrum of compound 5n**


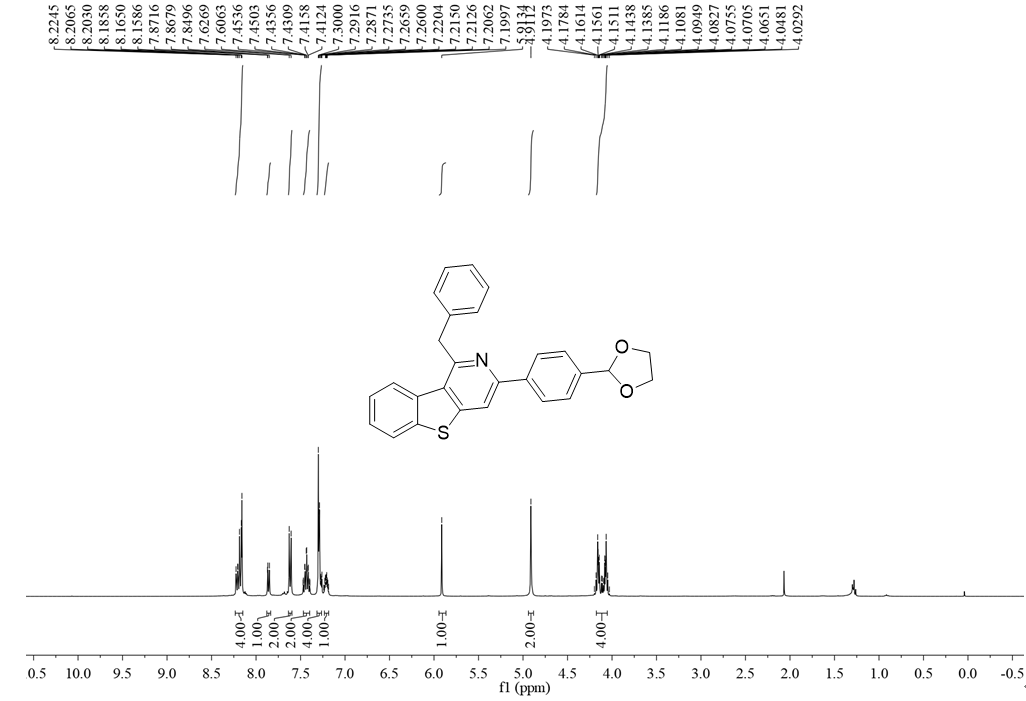


**13C NMR (100 MHz, CDCl3) spectrum of compound 5n**


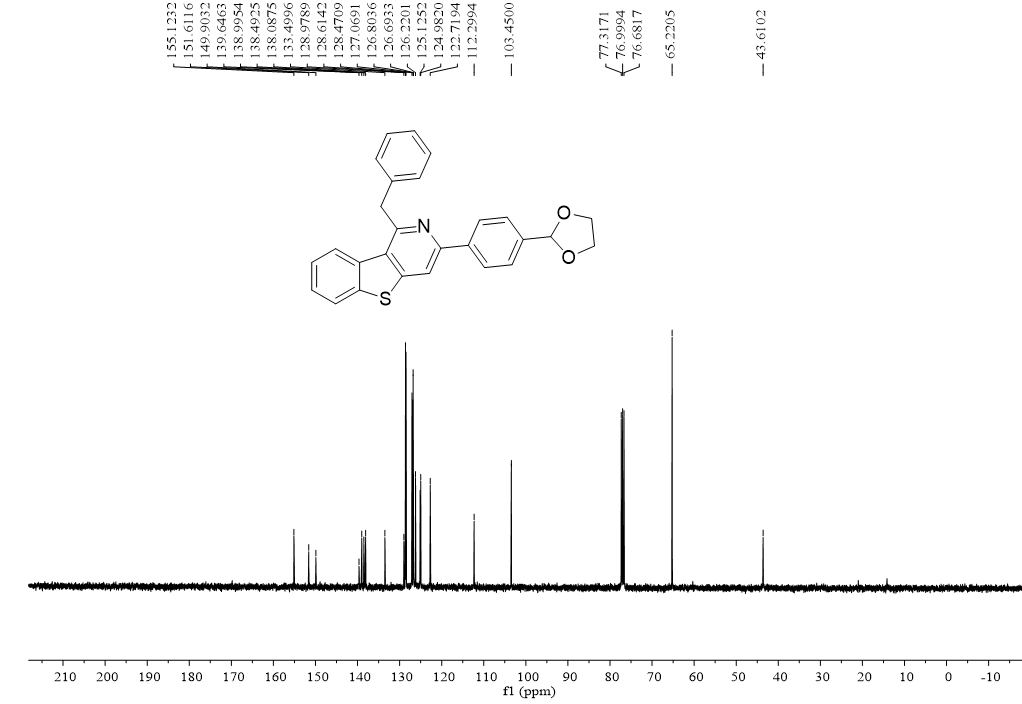


**1H NMR (400 MHz, CDCl3) spectrum of compound 5o**


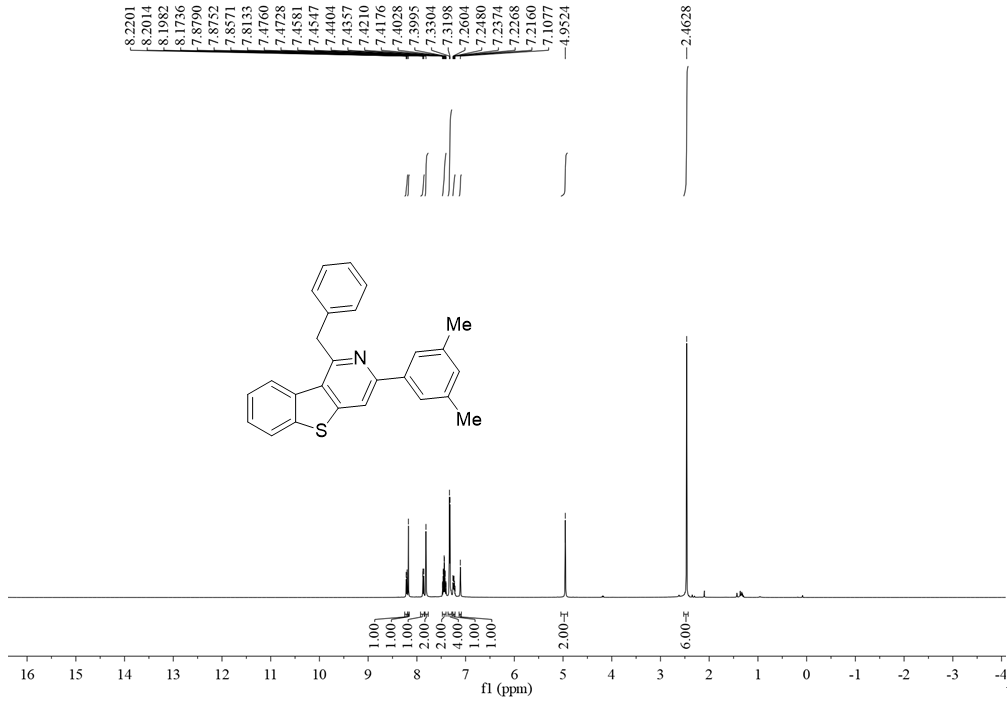


**13C NMR (100 MHz, CDCl3) spectrum of compound 5o**


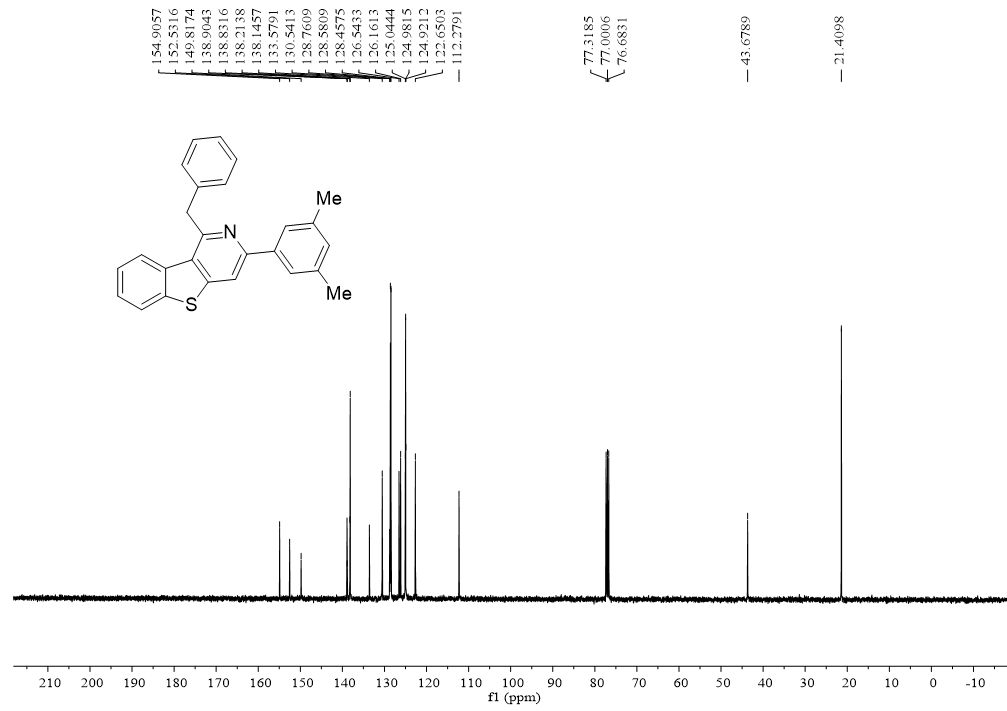


**1H NMR (400 MHz, CDCl3) spectrum of compound 5p**


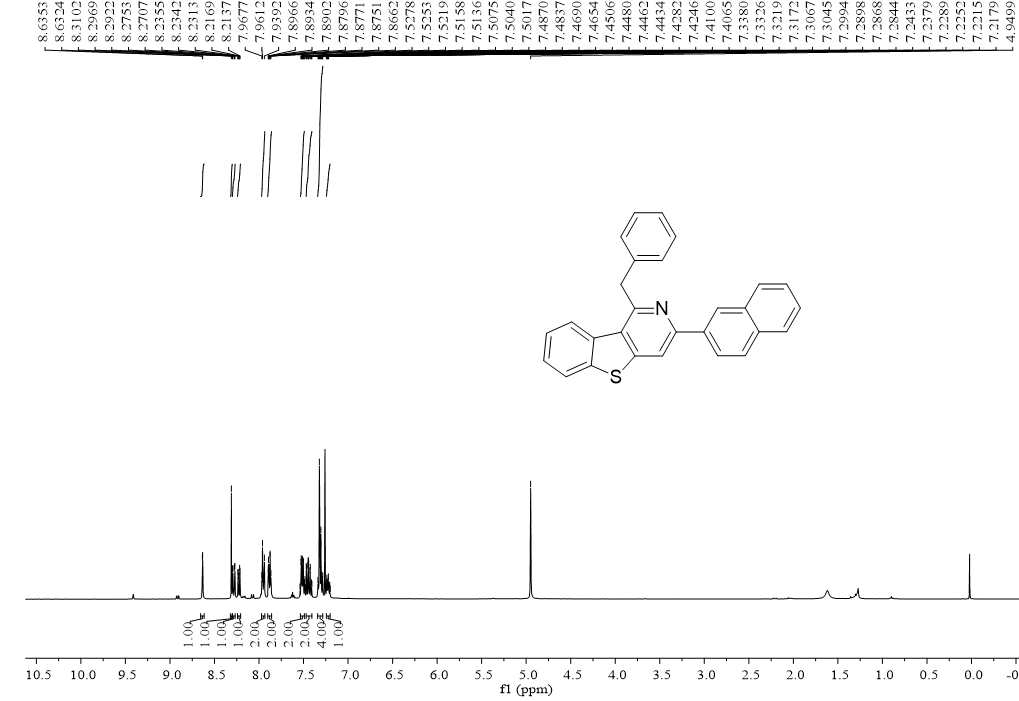


**13C NMR (100 MHz, CDCl3) spectrum of compound 5p**


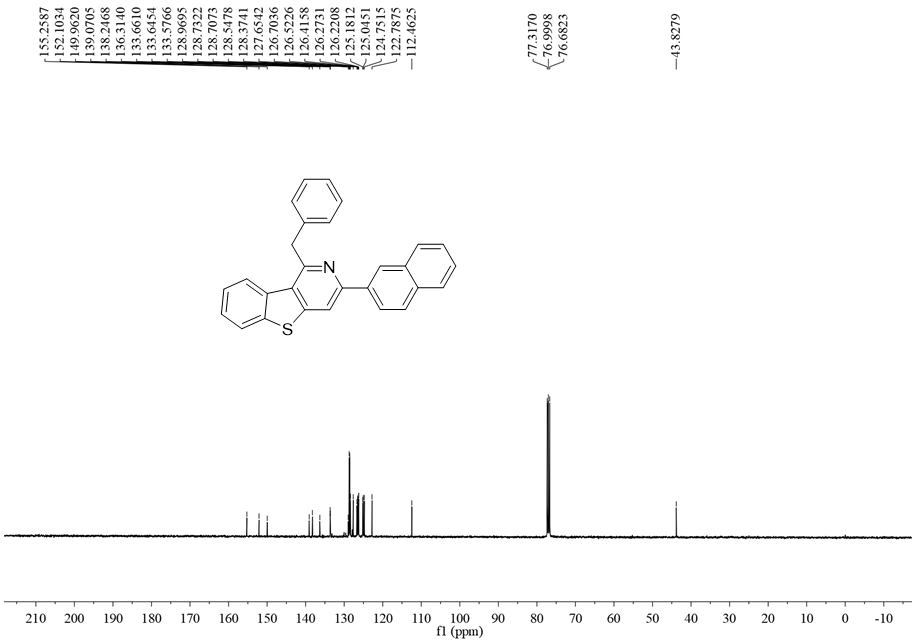


**1H NMR (400 MHz, CDCl3) spectrum of compound 5q**


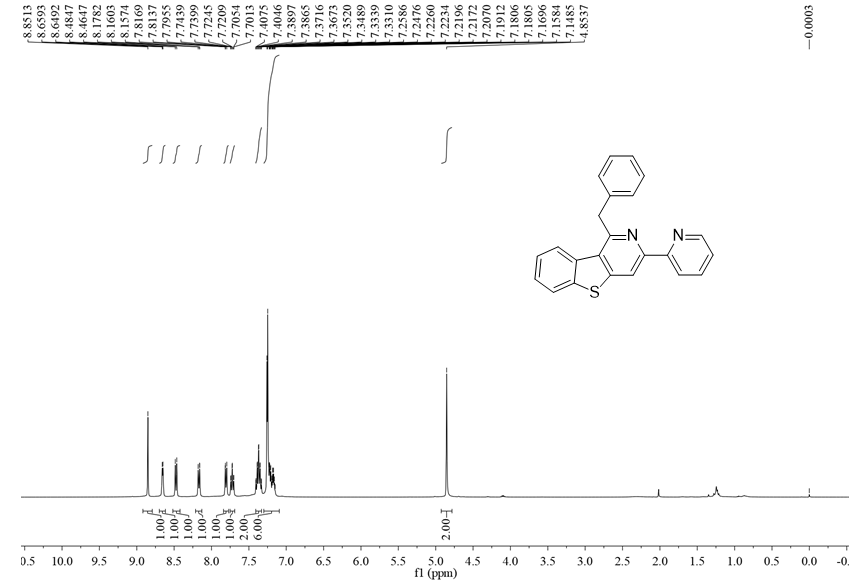


**13C NMR (100 MHz, CDCl3) spectrum of compound 5q**


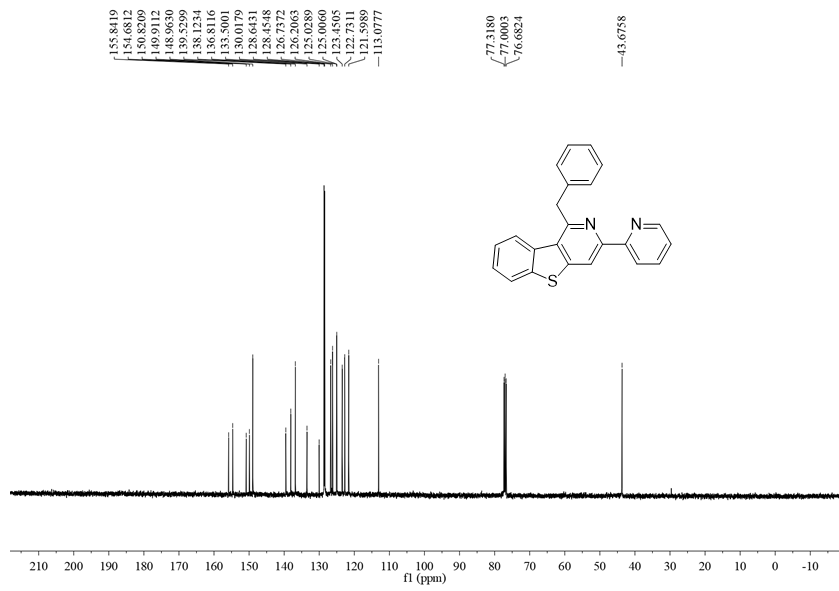


**1H NMR (400 MHz, CDCl3) spectrum of compound 5r**


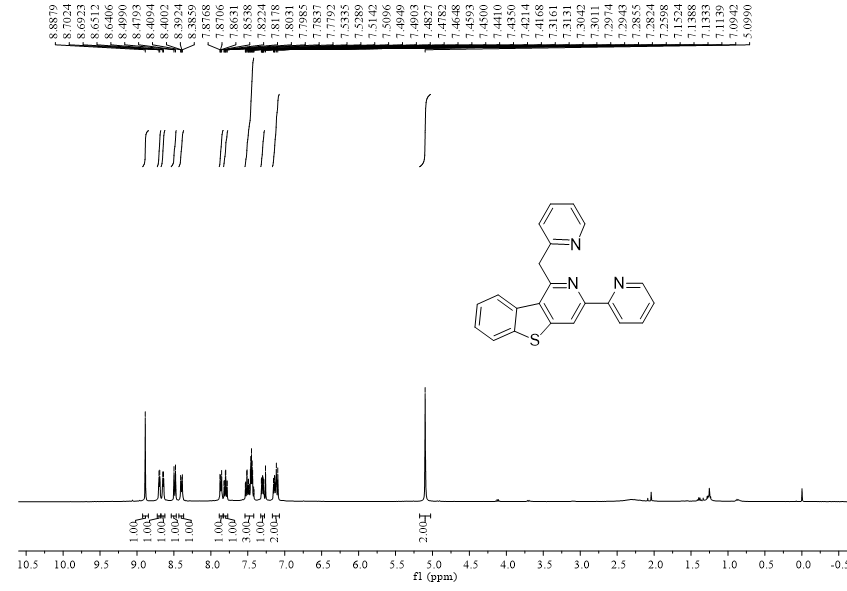


**13C NMR (100 MHz, CDCl3) spectrum of compound 5r**


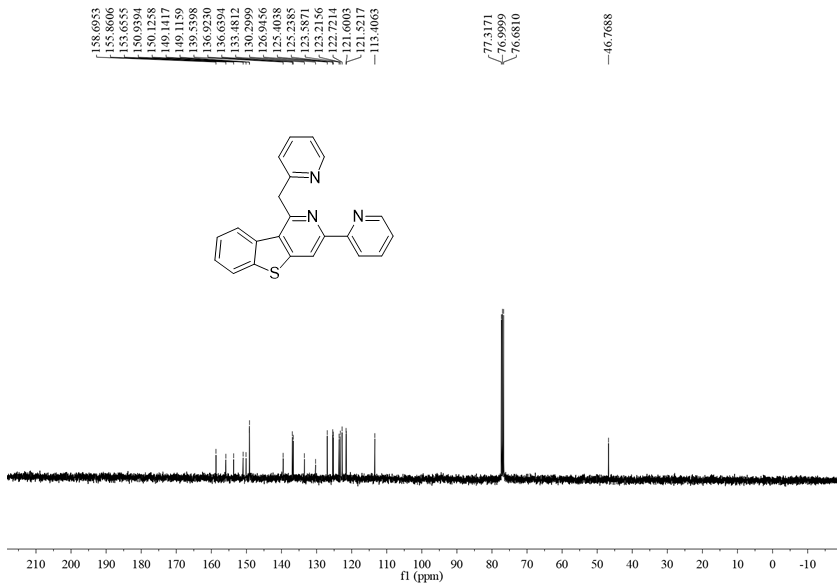


**1H NMR (400 MHz, CDCl3) spectrum of compound 5s**


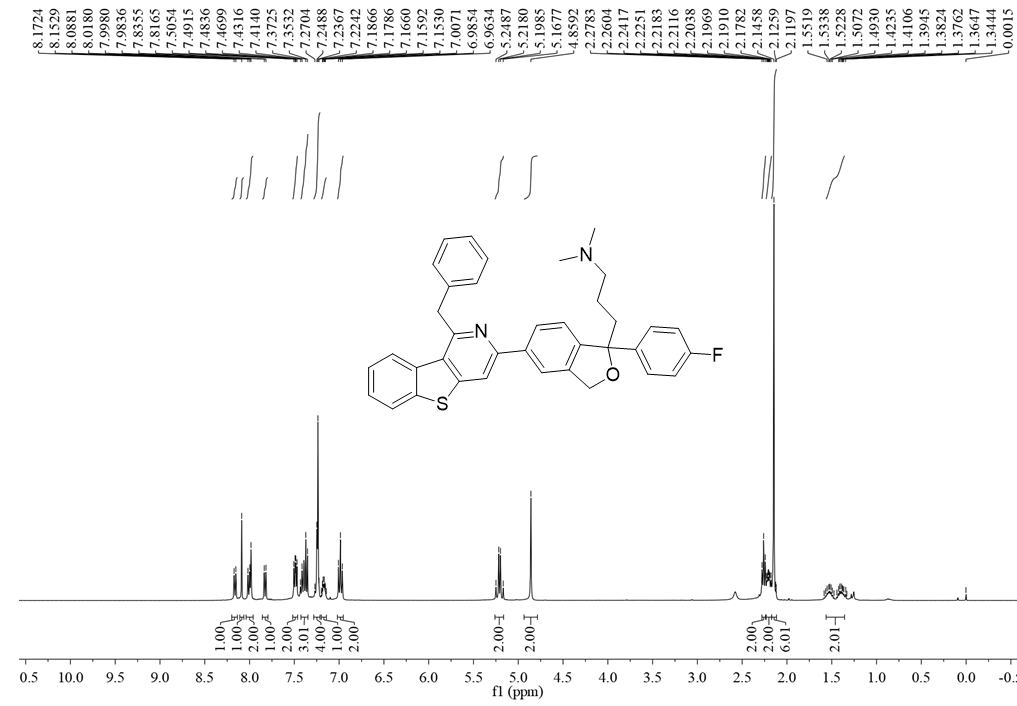


**13C NMR (100 MHz, CDCl3) spectrum of compound 5s**


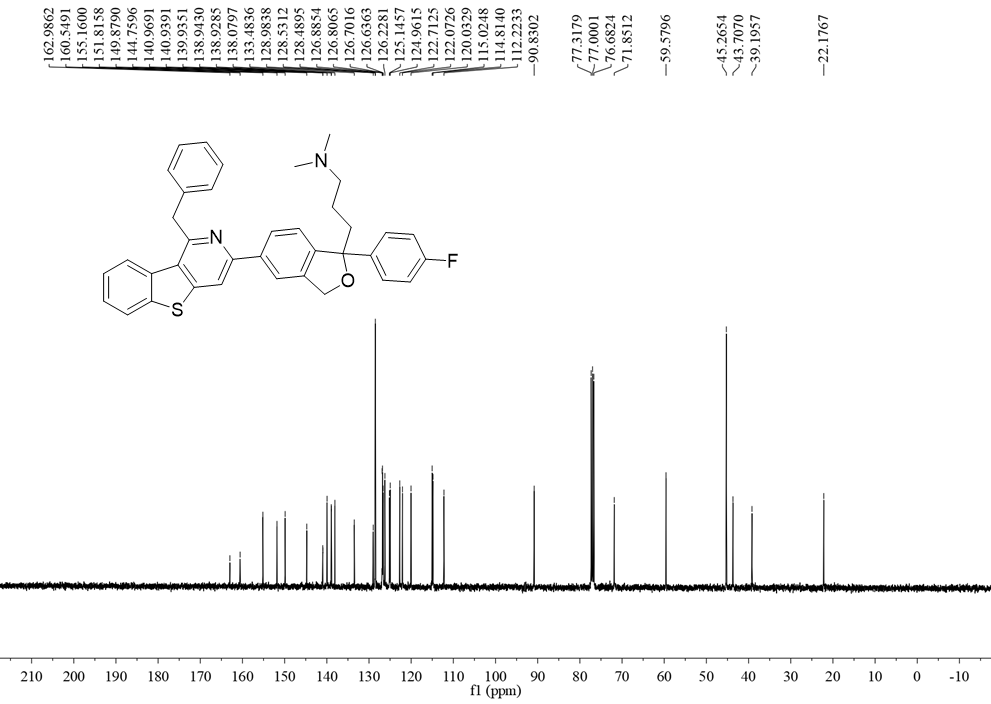


**1H NMR (400 MHz, CDCl3) spectrum of compound 7a**


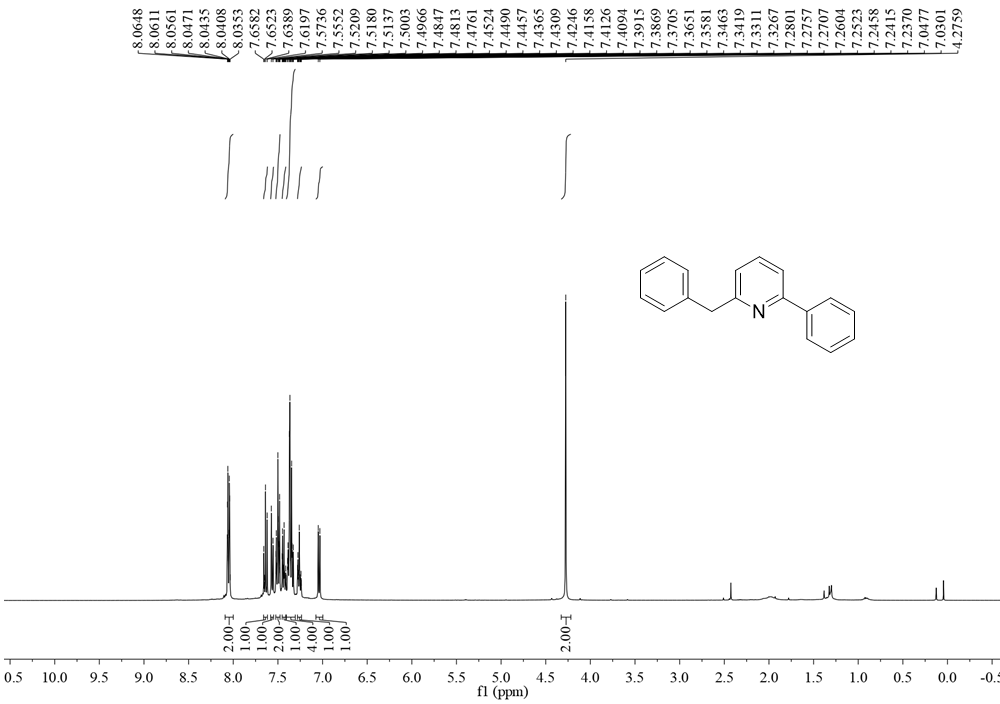


**13C NMR (100 MHz, CDCl3) spectrum of compound 7a**


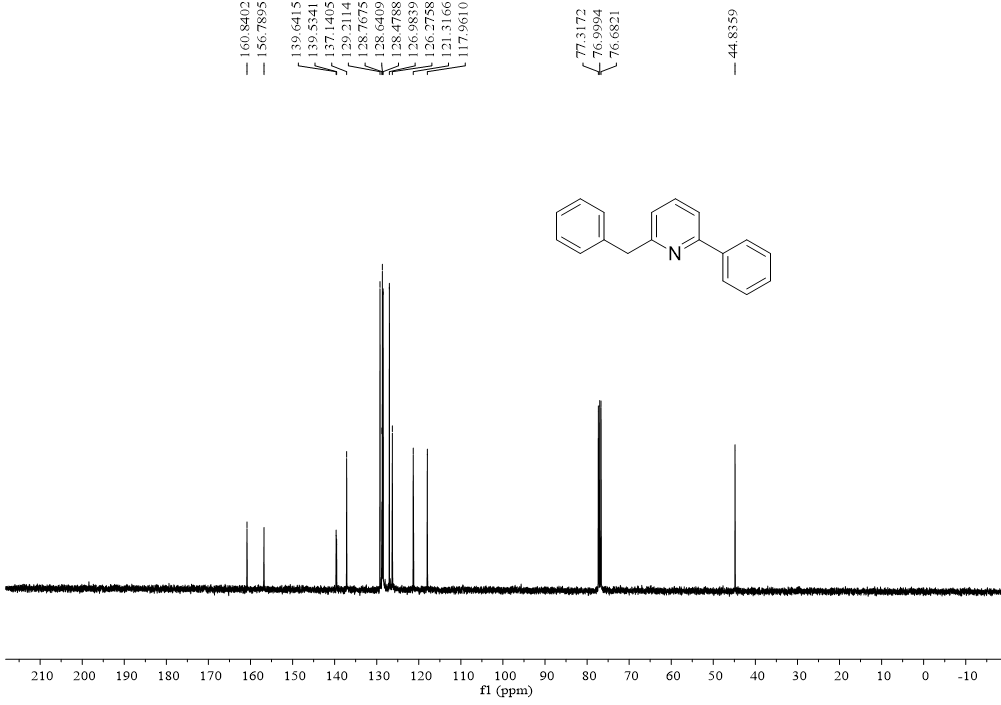


**1H NMR (400 MHz, CDCl3) spectrum of compound 7b**


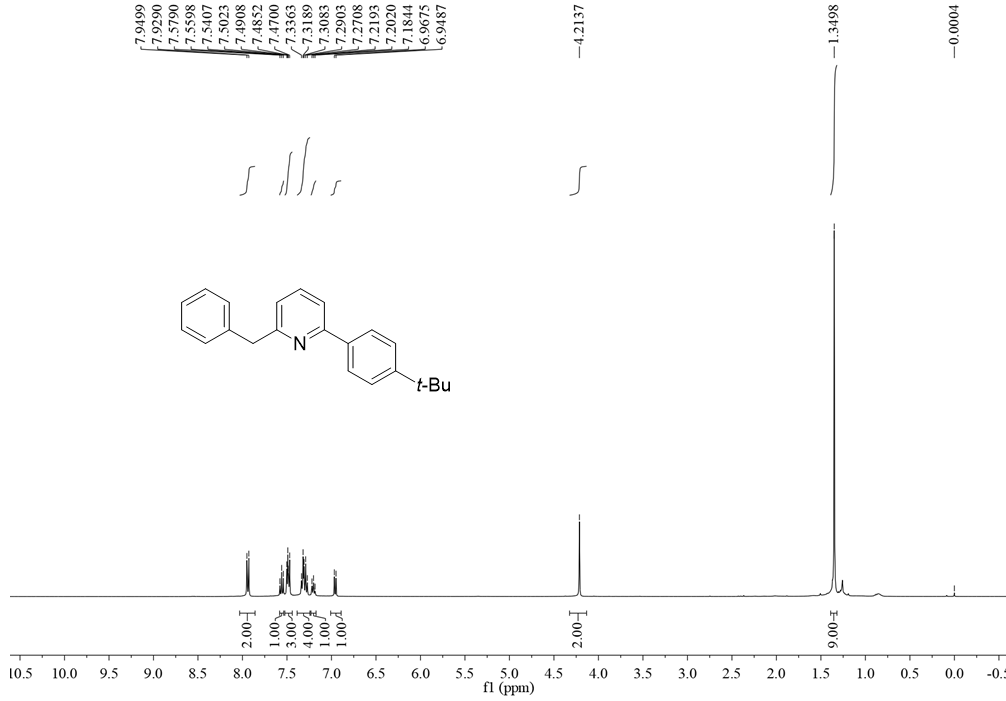


**13C NMR (100 MHz, CDCl3) spectrum of compound 7b**


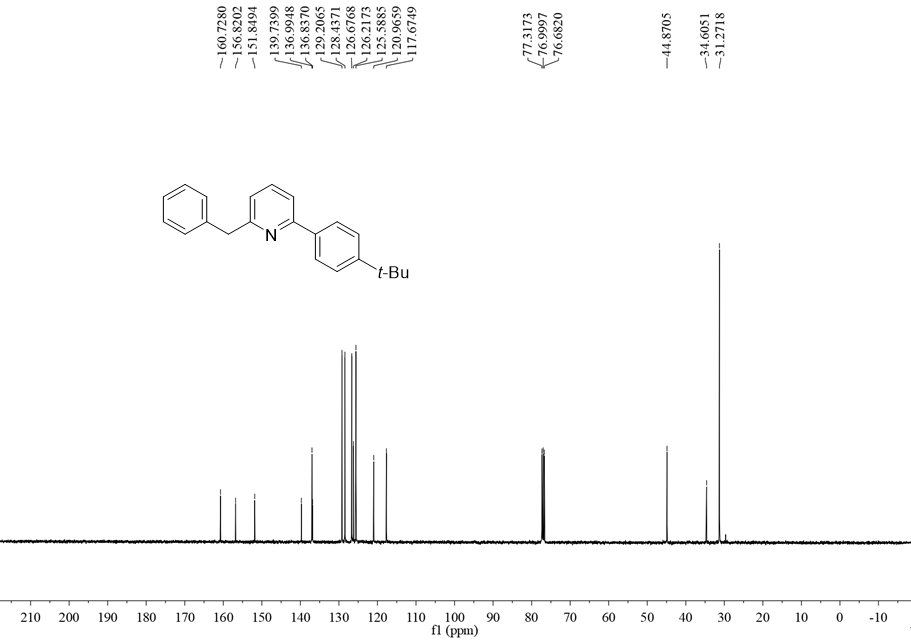


**1H NMR (400 MHz, CDCl3) spectrum of compound 7c**


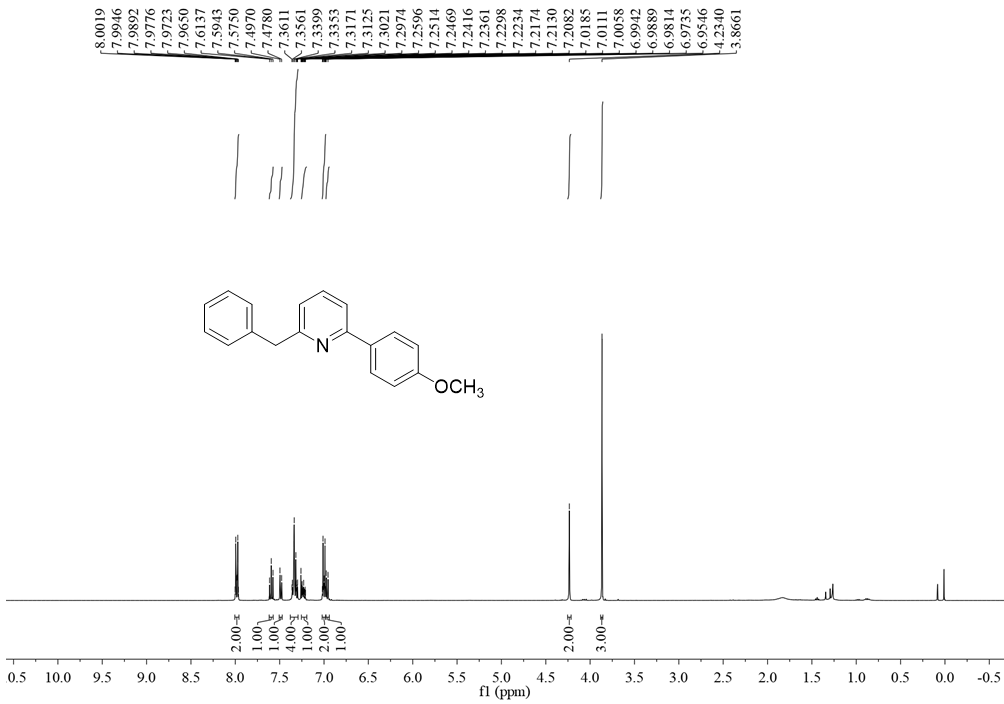


**13C NMR (100 MHz, CDCl3) spectrum of compound 7c**


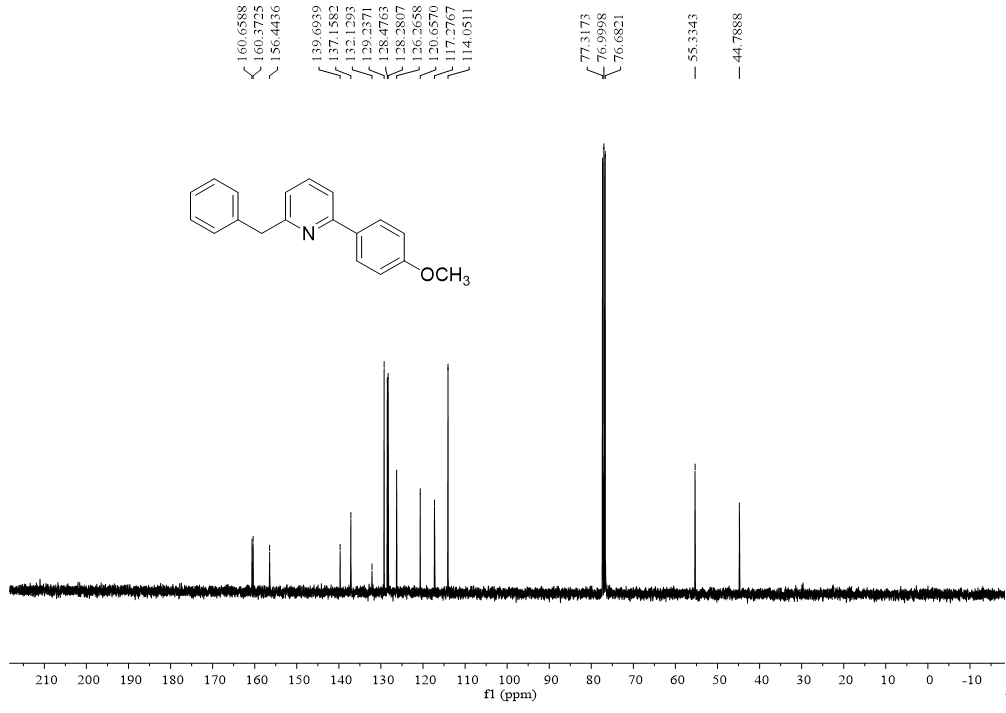


**1H NMR (400 MHz, CDCl3) spectrum of compound 7d**


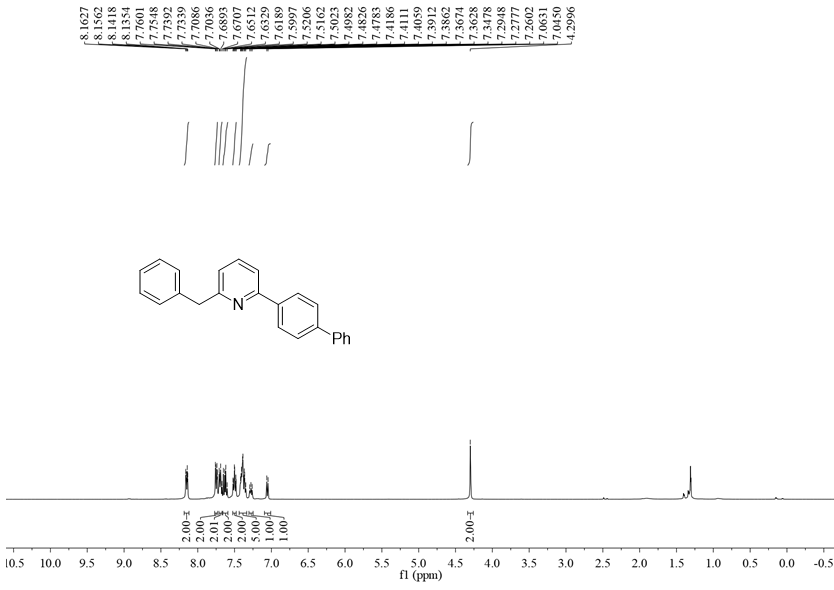


**13C NMR (100 MHz, CDCl3) spectrum of compound 7d**


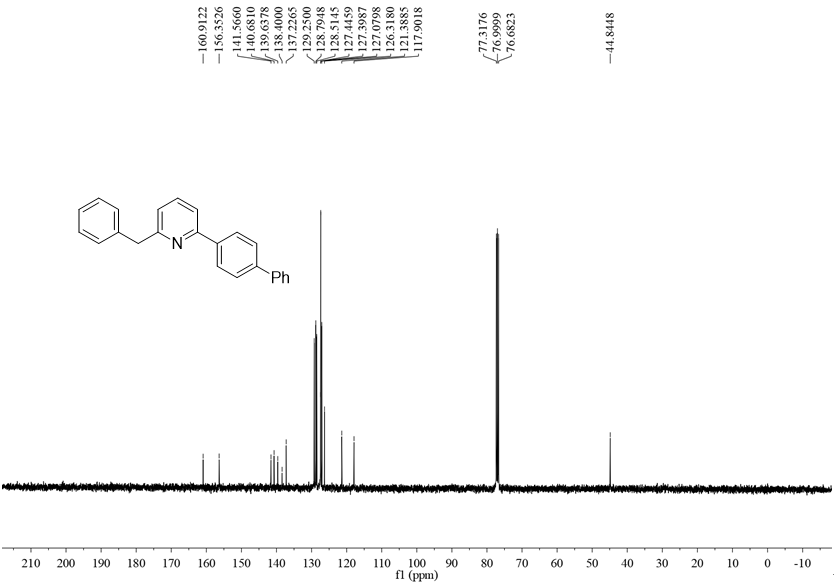


**1H NMR (400 MHz, CDCl3) spectrum of compound 7e**


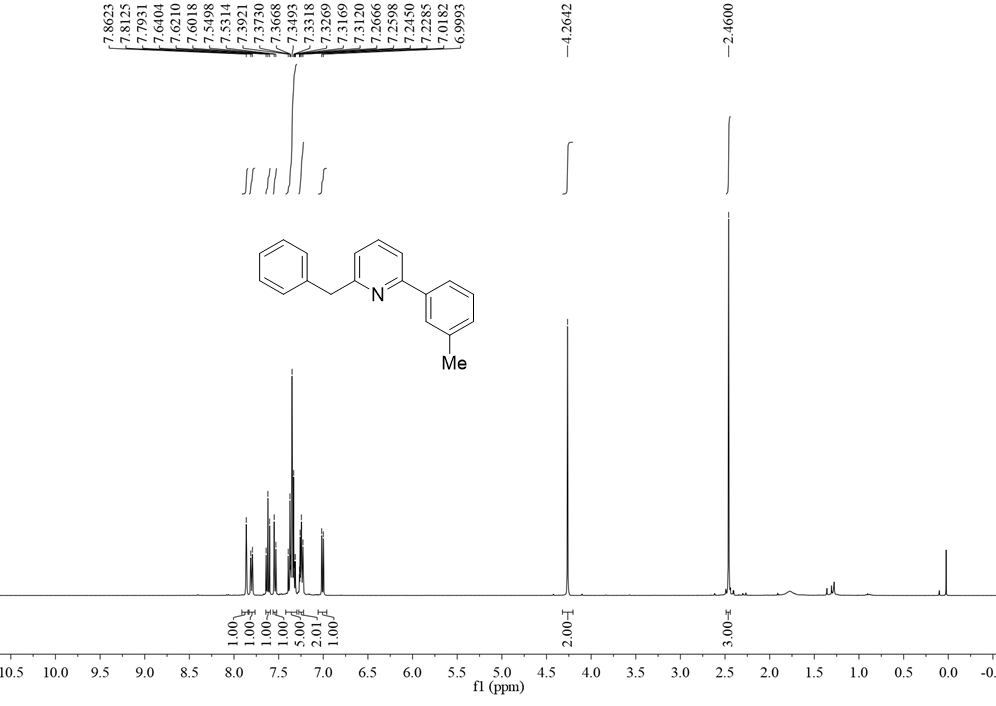


**13C NMR (100 MHz, CDCl3) spectrum of compound 7e**


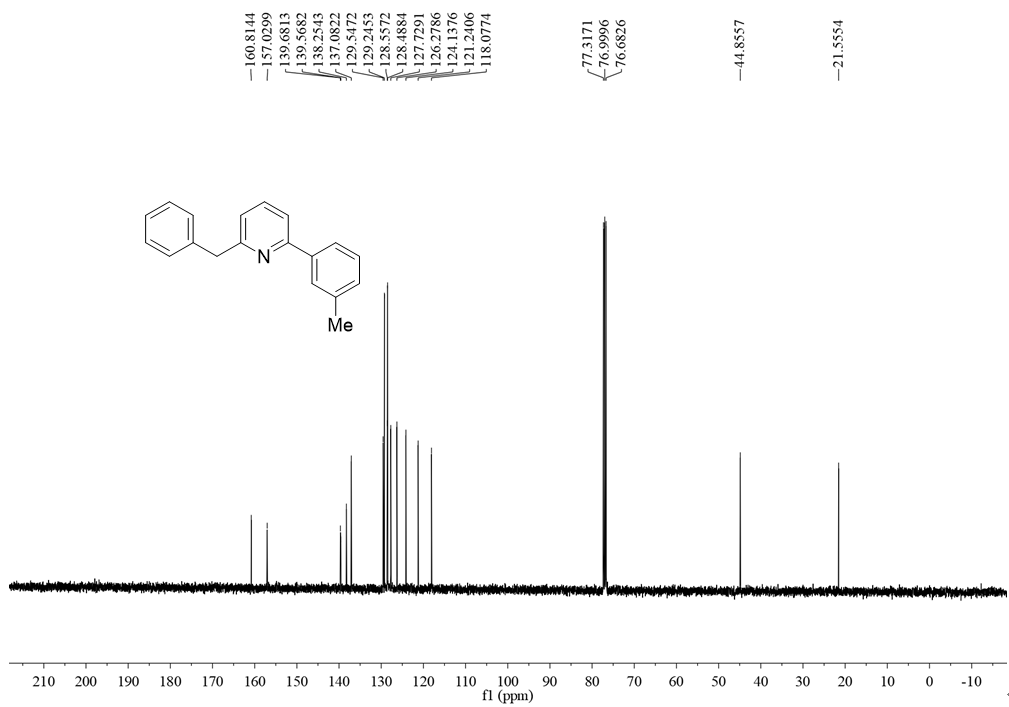


**1H NMR (400 MHz, CDCl3) spectrum of compound 7f**

**13C NMR (100 MHz, CDCl3) spectrum of compound 7f**

**1H NMR (400 MHz, DMSO) spectrum of compound 8**

**13C NMR (100 MHz, DMSO) spectrum of compound 8**

**1H NMR (400 MHz, DMSO) spectrum of compound 9**

**13C NMR (100 MHz, DMSO) spectrum of compound 9**
